# Supplementary material for: Risk assessment of metabolic syndrome prevalence involving sedentary occupations and socioeconomic status
Source: PubMed Central journal article supplement — BMJ Open. 2021 Dec 13;11(12):e042802. doi: 10.1136/bmjopen-2020-042802 (PMC8671945; doi:10.1136/bmjopen-2020-042802), 2021-12-13
Supplement: bmjopen-2020-042802.draft_revisions.pdf [file bmjopen-2020-042802.draft_revisions.pdf]

# BMJ Open

BMJ Open is committed to open peer review. As part of this commitment we make the peer review history of every article we publish publicly available.

When an article is published we post the peer reviewers' comments and the authors' responses online. We also post the versions of the paper that were used during peer review. These are the versions that the peer review comments apply to.

The versions of the paper that follow are the versions that were submitted during the peer review process. They are not the versions of record or the final published versions. They should not be cited or distributed as the published version of this manuscript.

BMJ Open is an open access journal and the full, final, typeset and author-corrected version of record of the manuscript is available on our site with no access controls, subscription charges or pay-per-view fees (<http://bmjopen.bmj.com>).

If you have any questions on BMJ Open's open peer review process please email [info.bmjopen@bmj.com](mailto:info.bmjopen@bmj.com)

# BMJ Open

## Health hazards of a sedentary occupation: Risk assessment of metabolic syndrome prevalence in taxi driving and other occupations

|                               |                                                                                                                                                                                                                                             |
|-------------------------------|---------------------------------------------------------------------------------------------------------------------------------------------------------------------------------------------------------------------------------------------|
| Journal:                      | <i>BMJ Open</i>                                                                                                                                                                                                                             |
| Manuscript ID                 | bmjopen-2020-042802                                                                                                                                                                                                                         |
| Article Type:                 | Original research                                                                                                                                                                                                                           |
| Date Submitted by the Author: | 20-Jul-2020                                                                                                                                                                                                                                 |
| Complete List of Authors:     | Chen, Ming-Shu; Oriental Institute of Technology, Department of Health Care Administration<br>Chiu, Chi-Hao; Far Eastern Memorial Hospital, Department of Medical Affairs<br>Chen, Shih-Hsin; Cheng Shiu University, Information Management |
| Keywords:                     | Other metabolic, e.g. iron, porphyria < DIABETES & ENDOCRINOLOGY, Health policy < HEALTH SERVICES ADMINISTRATION & MANAGEMENT, Risk management < HEALTH SERVICES ADMINISTRATION & MANAGEMENT, PUBLIC HEALTH                                 |
|                               |                                                                                                                                                                                                                                             |

SCHOLARONE™  
Manuscripts

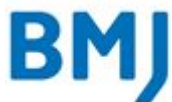

I, the Submitting Author has the right to grant and does grant on behalf of all authors of the Work (as defined in the below author licence), an exclusive licence and/or a non-exclusive licence for contributions from authors who are: i) UK Crown employees; ii) where BMJ has agreed a CC-BY licence shall apply, and/or iii) in accordance with the terms applicable for US Federal Government officers or employees acting as part of their official duties; on a worldwide, perpetual, irrevocable, royalty-free basis to BMJ Publishing Group Ltd ("BMJ") its licensees and where the relevant Journal is co-owned by BMJ to the co-owners of the Journal, to publish the Work in this journal and any other BMJ products and to exploit all rights, as set out in our [licence](#).

The Submitting Author accepts and understands that any supply made under these terms is made by BMJ to the Submitting Author unless you are acting as an employee on behalf of your employer or a postgraduate student of an affiliated institution which is paying any applicable article publishing charge ("APC") for Open Access articles. Where the Submitting Author wishes to make the Work available on an Open Access basis (and intends to pay the relevant APC), the terms of reuse of such Open Access shall be governed by a Creative Commons licence – details of these licences and which [Creative Commons](#) licence will apply to this Work are set out in our licence referred to above.

Other than as permitted in any relevant BMJ Author's Self Archiving Policies, I confirm this Work has not been accepted for publication elsewhere, is not being considered for publication elsewhere and does not duplicate material already published. I confirm all authors consent to publication of this Work and authorise the granting of this licence.

# Health hazards of a sedentary occupation: Risk assessment of metabolic syndrome prevalence in taxi driving and other occupations

Ming-Shu Chena, Chi-Hao Chiub, and Shih-Hsin Chen\*<sup>c</sup>

<sup>a</sup>Department of Healthcare Administration, Oriental Institute of Technology, No.58, Sec. 2, Sichuan Rd., Pan-Chiao Dist., New Taipei City 22061, Taiwan (R.O.C.)

<sup>b</sup>Department of Medical Affairs, Far Eastern Memorial Hospital, No.21, Sec. 2, Nanya S. Rd., Banqiao Dist., New Taipei City 22061, Taiwan (R.O.C.)

<sup>c</sup>Department of Information Management, Cheng Shiu University, No.840, Chengcing Rd., Niasong Dist., Kaohsiung City 83347, Taiwan (R.O.C.)

## ABSTRACT

**Objectives:** To determine the association between metabolic syndrome (MetS) prevalence and occupation—distinguished by being sedentary and nonsedentary and by socioeconomic status (SES)—with taxi driving as the representative sedentary occupation. Numerous occupations, lawyers, teachers, engineers, senior section chiefs of enterprises, taxi Driving, and so on are considered.

**Methods:** Two data sets with 64,578 cases were analyzed. MetS was identified according to criteria of the modified Adult Treatment Panel III. A binary longitudinal algorithm was used to test factors for three age segments. R for Windows (version 3.5.1) was used for all statistical analyses.

**Results:** MetS prevalence was 23.01%, 32.83%, and 35.92% for the younger, middle-aged, and older age groups, respectively. MetS was significantly more likely for sedentary occupations (OR = 0.89,  $p < 0.001$ ) including taxi drivers (33.41%), managers (32.52%), and workers in the service sector (29.53%). Taxi drivers were most likely to have MetS. Those working in occupations that are sedentary and associated with a high SES were more likely to have MetS (OR = 1.02) compared with those working in sedentary occupations associated with no particular SES.

**Conclusions:** Because high-SES and sedentary occupations increase MetS risk, we suggest for the authorities to focus them, specifically in tracking their trends for MetS indexes and tailoring health promotion programs to these groups.

**Keywords:** Sedentary occupation, Metabolic Syndrome, Risk assessment, Regression Model, Binary Longitudinal

## Algorithm

### Strengths and limitations of this study

- Even though the association between metabolic syndrome (MetS) prevalence and numerous occupations involving socioeconomic status (SES) have been studied in some works, we might be the first one to evaluate sedentary/non-sedentary occupations and by SES extensively.
- Two data sets with 64,578 cases were employed.
- The results show that sedentary occupations with high SES are at higher risk of MetS than non-sedentary ones.
- The main limitations of this study is that the data was only collected in Taiwan. The results might be not the same for other countries.

## INTRODUCTION

MetS has been established as a public health concern in Western countries and is an increasingly severe public health problem in East Asian countries. In the United States, 34% of adults satisfy the MetS criteria, which was formulated in the National Cholesterol Education Program Adult Treatment Panel (NCEP ATP III); in particular, US adults aged more than 60 years are more prone to having MetS [1]. The health status of the Taiwanese population was estimated in 2002 using

Corresponding author: shchen@csu.edu.tw

the data of 7566 participants in a nationwide cross-sectional population-based survey, named the Taiwanese Survey on Prevalence of Hyperglycemia, Hyperlipidemia, and Hypertension (TwSHHH). Hwang et al. [2] reported that the prevalence of MetS in women increases rapidly after the menopausal period to become higher than that in men; they also noted MetS' high correlations with age as well as overweight and obesity. In other Asian countries, MetS is also an important health issue, and studies on MetS have been conducted in Thailand [3], Malaysia [4], South Korea [5], and Japan [6] in addition to studies in Taiwan [2, 7, 8].

MetS is highly correlated with overweight and obesity [2, 9], and it comprises a constellation of interrelated metabolic disorders—including hypertension [10, 11, 12], type 2 diabetes mellitus (T2DM) [13, 14, 15], cardiovascular disease (CVD) [11, 11, 15], and stroke [16, 17]. In addition, people with MetS have fivefold diabetes [18]. The scholarly evidence has also preponderantly indicated that individuals with MetS or a sedentary occupation have increased the incidence of T2DM and coronary heart disease as well as increased mortality due to CVD [11, 13, 14, 15, 19].

As a result, the reasons causing MetS must be investigated. The risk factors for MetS include aging, sedentary, long working hours, physical inactivity, Western diet, sleep durations greater than 7 hours [20], and high occupational stress [21]. Socioeconomic status (SES) and lifestyle are the possible risk factors for MetS [22, 23]. Of these factors, prolonged sitting is an ostensible risk factor for negative health outcomes across all ages due to the rapid automation of the workplace [24, 25]. More recent studies have begun discussing the correlation of sedentary occupation with MetS or CVD risk [9, 26, 27, 28, 29, 30]. Bakrania et al. [27] demonstrated that sedentary behavior affects not only physical but also cognitive health. Another study on workers in a petroleum company reported that sedentary behavior—specifically for 10 h/day with two-thirds of those 10 h spent sitting at work—was significantly associated with cardiometabolic risk factors [31]. An individual having a sedentary occupation is significantly more likely to be obese. Strauß et al. [9] found that office workers had a significantly greater abdominal waist circumference (WC) than do firefighters and that 33% of sedentary German office workers had MetS.

However, its risk association must be replicated with respect to occupational condition or SES [23, 31, 32, 33]. Al-Thani et al. [32] shown that no statistical significant association was founded for occupation. Mehrdad et al. [23] found the association between MetS and three job ranks in a company didn't cause significant difference. Therefore, this study focused on MetS prevalence—and the related chronic disease biochemi-

cal test indexes—with respect to occupation among adults in Taiwan. The current study focused on sedentary occupations and occupations associated with different SES brackets. We selected taxi driving as the representative sedentary occupation, in addition to analyzing some high-SES-associated occupations.

In Taiwan, taxi drivers work more than 10 hours a day. They spend most of their working hours in the vehicle, and their meal times are irregular. Wu [34] reported that taxi drivers have back pain caused by a sedentary lifestyle over the long term and a lack of outdoor activity. Similarly, Shin et al. [30] found that middle-aged male occupational drivers in South Korea's Gwangju city were more likely to develop cardiovascular (CV) event compared with their peers of the same age in other occupations. According to the most recent survey report on taxi drivers in Taiwan by Taiwan's Ministry of Transportation and Communications<sup>1</sup>, as of the end of September 2018, there were 86.6% were 54.2 years-old in average and spent 9.7 h/day driving, not including the time taken to eat and rest. Considering the aforementioned survey report, this study analyzed the health status of taxi drivers due to they are explicitly seating for a long time.

In addition, although there are numerous studies that include some occupations or SES condition, this research might be the first one to study those in other sedentary or more high-SES-associated occupations, especially occupations that increase MetS risk which haven't explored yet by prior researches. The occupation studied in this research include lawyers, teachers, engineers, senior section chiefs of enterprises, taxi Driving, and so on. The next section explain the methods used in this paper.

## METHODS

### Definition of a sedentary occupation

According to the US Department of Labor's Dictionary of Occupational Titles, sedentary work is the occasional exertion of >10 lbs of force and/or a frequent exertion of a negligible amount of force. In this definition, "occasional" and "frequent" are defined as being present <1/3 and 1/3–2/3 of the time, respectively. Such force can be used to lift, carry, push, pull, or move objects—including the human body. Sedentary work involves sitting most of the time, but it may involve walking or standing for brief periods<sup>2</sup>. Thus, a job was defined to be sedentary if walking and standing are required only occasionally and all other sedentary criteria are met [35].

<sup>1</sup><https://www.motc.gov.tw/ch/home.jsp?id=56parentpath=0,6mcustomize=statistics101.jsp>  
<sup>2</sup><https://www.thehortongroup.com/resources/the-strength-test-levels>

## Definition of MetS

MetS was defined in this study according to guidelines from the Health Promotion Administration of Taiwan's Ministry of Health and Welfare. MetS prevalence was evaluated using the definitions of the modified ATP III and the MetS criteria for Taiwanese (MetS-TW). Five major factors were used to determine whether a person had MetS: WC, high blood pressure, fasting blood sugar (BS), triglyceride (TG) level, and HDL-C level. High blood pressure included the rates of systolic blood pressure (SBP) and diastolic blood pressure (DBP). Specifically, a Taiwanese person is defined as having MetS if they have three or more of the following five conditions in the ATP III: abdominal obesity, high TG, low HDL-C, hypertension, and hyperglycemia; the rules are detailed in Table 1.

## Data resource and data collection

Two data sets were analyzed. The first was the New Taipei City Government Annual Taxi Health Examination Survey, which covers the 2012–2016 period and is conducted by Far Eastern Memorial Hospital (FEMH), and the second was the MJ Health Check-Up–Based Population Database (MJPD) (2012–2016). The MJPD is accessible to researchers upon request<sup>3</sup>, and the data were collected from four MJ clinics, which provide periodical health examinations to their members. Each member participated in a check-up program that offered a reduced fee in exchange for returning to take the examination regularly over multiple years. All of the data sets used in this study were authorized and given to this study's researchers by the MJPD Health Research Foundation. The laboratory data of the two databases were obtained from the same biochemical examination apparatus (Hitachi-7600), and the data sets conform to the ISO-15189 guidelines. Regarding ethical data use, the protocol of this study was approved by the Research Ethics Review Committee at FEMH (FEMH-IRB-107126-E and ) and the MJ Health Research Foundation.

## Definition of other terms

Participants in both data sets had participated in one or more health examination sessions. A person can have one or more sets of records in the data sets. To distinguish between a person and the record of a person, we defined a "case" as a person and a "record" as the data on one person obtained from one health examination session.

<sup>3</sup><http://www.mjhrf.org/main/page/release1/en/release01>

## Data preprocessing

The FEMH database had 2,294 cases of taxi drivers (2,182 male and 112 female). To ensure representativeness in the analysis, we excluded female taxi drivers because their data only comprised 4.87% of the data set. The MJPD database had 117,076 cases (62,396 male and 54,680 female). We also excluded female taxi drivers to control for the effects of gender. Therefore, we analyzed data of 64,578 cases: 2,182 cases of taxi drivers from the FEMH database, and 62,396 health screening cases from the MJ database. After combining the two databases, MetS was identified based on the NCEP ATP III MetS criteria, and MetS prevalence was calculated. Because age has been demonstrated to be an essential influence on MetS risk, we stratified the data into  $\leq 40$ -, 40–60-, and  $\geq 60$ -year-old groups. We focused on the effect on MetS risk from occupation—distinguished first by whether the occupation is sedentary versus or non-sedentary and second, by the occupation's association with SES. We employed nine occupational categories: "Professional-1," including lawyers, teachers, accountants, and nurses; "Technical-2," including engineers, architects, and programmers; "Managerial-3," including senior executives of government departments or section chiefs of enterprises; "Sales-4;" "Service-5;" "Clerical and Administrative-6;" "Manual Labor-7;" "Taxi Driving-8;" and "Others-9." These categories fell into one of the following three groups, which were defined with respect to SES and sedentary status: (I) general and sedentary, (II) nonsedentary, and (III) sedentary and high-SES-associated. We excluded data entries falling under the occupational category "Others" and entries with missing values. Group I contained three categories: Service-5, Clerical and Administrative-6, and Taxi Driver-8; Group II contained two categories: Sales-4 and Manual Labor-7; and Group III contained three categories: Professional-1, Technical-2, and Managerial-3.

## Statistical analysis

The statistical analysis and graphs in this study were performed using an R (v3.5.1) package for binary longitudinal data (*bild*). A p-value of  $< 0.05$  indicated statistical significance between the two test populations. In the univariate analysis, a two-sample independent *t* test was adopted to analyze the difference in the mean value of continuous variables between participants with and without MetS. An exact chi-square test was used to define the differences between categorical variables. Multiple logistic regression was used to determine the effect of all influential variables. Finally, the *bild* package was judged to be most suitable, considering that most participants were examined multiple times.

**Table 1** MetS criteria

| No. | Factors                                      | Abnormal Condition                       |
|-----|----------------------------------------------|------------------------------------------|
| 1   | Fasting Plasma Glucose (FPG)                 | FPG $\geq$ 100mg/dL                      |
| 2   | High Density Lipoprotein Cholesterol (HDL-C) | Male $<$ 40mg/dL or Female $<$ 50mg/dL   |
| 3   | High Blood Pressure                          | SBP $\geq$ 130mmHg or DBP $\geq$ 85mmHg  |
| 4   | Triglyceride (TG)                            | TG $\geq$ 150mg/dL                       |
| 5   | Waist Circumference (WC)                     | Male $\geq$ 90 cm or Female $\geq$ 80 cm |

## RESULTS

We only analyzed the data of those who first, were taxi drivers and second, had two records in the database. Any personal information of all individuals was removed to protect their privacy. We analyzed 201,087 records in total, including those for gender, height, weight, WC, blood pressure, TG level, HDL-C, SBP, DBP, and fasting BS. We computed the BMI from the height and weight data. In the next sub-sections, we present the descriptive statistics and the correlations among factors.

### Descriptive Statistics

After processing the data, the original database comprised 64,578 cases: 2,182 cases of taxi drivers from the FEMH database, and 62,396 health screening cases from the MJ database. We excluded the data entries with the occupational category "Others" and with "missing values," leaving 43,782 cases for data analysis. Of these 43,782 cases, 31,454 did not have MetS and 12,328 had MetS. MetS prevalence in this study thus was 28.16%. We conducted comparisons for the various physiological parameters, such as weight, SBP, and DBP (Table 2). Compared with those with MetS, individuals without MetS were healthier: their weight, SBP, WC, TG level, and BMI were lower and their HDL-C level was greater. All characteristics were significantly related to MetS ( $p < 0.001$ ).

We further stratified the cases into three age groups: 21,410 cases were in the younger age group ( $\leq 40$  years old), 20,565 cases were in the middle-aged group (40–60 years old), and 1,807 cases were in the older age group ( $> 60$  years old). Table 3 details the age-stratified data—most cases were aged  $\leq 40$  years. MetS prevalence was 23.01%, 32.83%, and 35.92% for the younger, middle-aged, and older age groups, respectively. The result is consistent with studies reporting that MetS becomes more likely with age [1, 16]. Furthermore, as noted in table 3, all factors—such as weight, SBP, DBP, and WC—were significantly related ( $p < 0.001$ ) to MetS prevalence for all age groups, identical to the findings for the unstratified data in Table 2.

### Chi-square exact test and multiple logistic regression analysis

Because some variables for characteristics were categorical, we used a chi-square test to analyze the relationships among them. Table 4 presents the results. Age and occupation were significantly associated with MetS ( $p < 0.001$ ). To explore the public perception of risk indicators of MetS, we further analyzed the eight aforementioned occupational categories. All occupation categories were significantly associated with MetS ( $p < 0.001$ ). Among the occupations, taxi driving had the highest MetS prevalence (33.41%), which was much higher than the 28.16% prevalence in the unstratified data. The occupational categories with the highest MetS prevalence were Taxi Driver-8, Managerial-3, and Sales-4 at 33.41%, 32.52%, and 29.53%, respectively.

We further analyzed the associations between major factors in a multiple logistic regression (Table 5). BMI (%), body weight (kg), body fat percentage (%) and total cholesterol (mg/dL) were revealed to be the important risk factors for MetS ( $p < 0.001$ ). Age is the most important risk indicator, with MetS becoming more likely with age. As for the three occupational groups that the eight occupational categories fell under, those in group-II (i.e., non-sedentary) occupations were less likely to develop MetS (OR = 0.89, CI: 0.82-0.97,  $p = 0.0107$ ) compared with the two other groups, and those in group-III (i.e., sedentary and high-SES-associated) occupations were more likely to develop MetS compared with group-I occupations (i.e., sedentary occupations associated with no particular SES, including taxi driving) at an OR of 1.02 (CI: 0.96-1.09).

## DISCUSSION

Owen et al. reported that the average person spends (1) 71% of their daily waking hours in a sedentary state and (2) only 30 min daily on moderate intensity physical activity on most days of a week [25]. As noted in the literature review in the Introduction section, MetS likelihood significantly increases with sedentary time and sedentary behavior [25, 36, 37]. Being sedentary also makes one significantly more likely to be obese

**Table 2** Comparison of MetS characteristics

| Variables               | Metabolism syndrome |         |                       |        |                    |         | p-value |
|-------------------------|---------------------|---------|-----------------------|--------|--------------------|---------|---------|
|                         | Total               |         | Without<br>(n=31,454) |        | With<br>(n=12,328) |         |         |
|                         | Mean                | (SD)    | Mean                  | (SD)   | Mean               | (SD)    |         |
| Weight(Kg)              | 72.8                | (11.3)  | 69.7                  | (9.3)  | 80.9               | (12.1)  | <0.001  |
| SBP(mmHg)               | 120.6               | (15.0)  | 116.8                 | (13.0) | 130.3              | (15.4)  | <0.001  |
| DBP(mmHg)               | 77.4                | (10.5)  | 74.8                  | (9.2)  | 84.0               | (10.6)  | <0.001  |
| WC(cm)                  | 84.1                | (8.7)   | 81.2                  | (7.0)  | 91.5               | (8.3)   | <0.001  |
| Body Fat (%)            | 24.3                | (5.5)   | 22.8                  | (4.8)  | 28.0               | (5.3)   | <0.001  |
| FPG(mg/dl)              | 103.2               | (18.7)  | 99.5                  | (12.6) | 112.6              | (26.8)  | <0.001  |
| TG(mg/dl)               | 136.8               | (103.5) | 113.6                 | (74.7) | 196.0              | (137.7) | <0.001  |
| CHOL                    | 197.5               | (34.2)  | 195.4                 | (33.1) | 202.8              | (36.1)  | <0.001  |
| HDL-C(mg/dl)            | 52.0                | (11.4)  | 54.3                  | (11.3) | 46.0               | (9.3)   | <0.001  |
| LDL-C(mg/dl)            | 124.8               | (32.1)  | 122.9                 | (31.1) | 129.6              | (33.9)  | <0.001  |
| BMI(Kg/m <sup>2</sup> ) | 24.8                | (3.4)   | 23.7                  | (2.7)  | 27.4               | (3.5)   | <0.001  |

**Table 3** Comparisons of MetS characteristics stratified by age

| Variables               | Age≤40<br>(n=21,410) |              | p-value | 40<Age≤60<br>(n=20,565) |              | p-value | Age>60<br>(n=1,807) |              | p-value |
|-------------------------|----------------------|--------------|---------|-------------------------|--------------|---------|---------------------|--------------|---------|
|                         | Non<br>MetS          | MetS         |         | Non<br>MetS             | MetS         |         | Non<br>MetS         | MetS         |         |
|                         | Mean (SD)            | Mean (SD)    |         | Mean (SD)               | Mean (SD)    |         | Mean (SD)           | Mean (SD)    |         |
| Weight(Kg)              | 70.8(9.7)            | 85.1(12.5)   | <0.001  | 68.7(8.5)               | 78.6(11.0)   | <0.001  | 64.9(8.5)           | 73.5(9.6)    | <0.001  |
| SBP(mmHg)               | 115.9(11.7)          | 128.9(14.7)  | <0.001  | 117.1(13.7)             | 130.5(15.6)  | <0.001  | 125.8(17.2)         | 139.2(16.2)  | <0.001  |
| DBP(mmHg)               | 73.4(8.6)            | 82.4(10.6)   | <0.001  | 76.1(9.5)               | 85.0(10.5)   | <0.001  | 77.8(10.5)          | 85.0(10.0)   | <0.001  |
| WC(cm)                  | 80.8(7.2)            | 92.6(8.6)    | <0.001  | 81.6(6.7)               | 90.6(8.1)    | <0.001  | 83.0(7.4)           | 91.5(8.0)    | <0.001  |
| Body Fat (%)            | 23.3(5.0)            | 29.6(5.3)    | <0.001  | 22.3(4.5)               | 27.0(5.0)    | <0.001  | 21.3(4.8)           | 25.8(5.4)    | <0.001  |
| FPG(mg/dl)              | 97.8(9.3)            | 108.5(22.8)  | <0.001  | 101.2(14.7)             | 114.6(27.7)  | <0.001  | 103.3(21.0)         | 122.0(37.6)  | <0.001  |
| TG(mg/dl)               | 109.1(74.0)          | 198.9(148.4) | <0.001  | 120.1(77.0)             | 196.0(132.2) | <0.001  | 101.1(47.2)         | 173.7(103.5) | <0.001  |
| CHOL                    | 192.1(32.8)          | 203.5(36.2)  | <0.001  | 199.6(33.0)             | 203.1(36.0)  | <0.001  | 192.0(34.0)         | 194.6(35.3)  | <0.001  |
| HDL-C(mg/dl)            | 54.4(11.2)           | 45.4(8.9)    | <0.001  | 54.2(11.3)              | 46.3(9.5)    | <0.001  | 55.3(11.8)          | 46.3(10.5)   | <0.001  |
| LDL-C(mg/dl)            | 120.6(31.1)          | 131.9(33.9)  | <0.001  | 125.8(30.9)             | 128.7(34.0)  | <0.001  | 120.2(31.3)         | 122.0(32.0)  | <0.001  |
| BMI(Kg/m <sup>2</sup> ) | 23.7(2.9)            | 28.2(3.7)    | <0.001  | 23.7(2.5)               | 27.0(3.2)    | <0.001  | 23.8(2.8)           | 26.6(3.3)    | <0.001  |

**Table 4** Chi-square test results of categorical variables for characteristics as well as MetS criteria variables

| Variables  | Item                          | Non-MetS |         | MetS  |         | p-value |
|------------|-------------------------------|----------|---------|-------|---------|---------|
|            |                               | No.      | (%)     | No.   | (%)     |         |
| Age        | Age≤40                        | 16,483   | (76.99) | 4,927 | (23.01) | <0.001  |
|            | 40<Age≤60                     | 13,813   | (67.17) | 6,752 | (32.83) | <0.001  |
|            | Age>60                        | 1,158    | (64.08) | 649   | (35.92) | <0.001  |
| Occupation | Professional-1                | 1,936    | (74.18) | 674   | (25.82) | <0.001  |
|            | Technical-2                   | 12,603   | (74.5)  | 4,314 | (25.5)  | <0.001  |
|            | Managerial-3                  | 5,704    | (67.48) | 2,749 | (32.52) | <0.001  |
|            | Sales-4                       | 4,516    | (70.47) | 1,892 | (29.53) | <0.001  |
|            | Service-5                     | 1,557    | (71.32) | 626   | (28.68) | <0.001  |
|            | Clerical and Administrative-6 | 1,558    | (73.94) | 549   | (26.06) | <0.001  |
|            | Manual Labor-7                | 2,127    | (72.79) | 795   | (27.21) | <0.001  |
|            | Taxi Driver-8                 | 1,453    | (66.59) | 729   | (33.41) | <0.001  |



**Table 5** Multiple logistic regression results for risk-factor associations

| Variables                | Condition     | OR   | 95%CI     | p-value |
|--------------------------|---------------|------|-----------|---------|
| Age                      | Age ≤ 40      | 1.00 |           |         |
|                          | 40 < Age ≤ 60 | 2.32 | 2.20 2.46 | <0.001  |
|                          | Age > 60      | 3.65 | 3.22 4.14 | <0.001  |
| Occupation               | Group-I*      | 1.00 |           |         |
|                          | Group-II†     | 0.89 | 0.82 0.97 | 0.0107  |
|                          | Group-III‡    | 1.02 | 0.96 1.09 | 0.523   |
| Weight(Kg)               |               | 1.03 | 1.03 1.04 | <0.001  |
| BMI                      |               | 1.28 | 1.26 1.31 | <0.001  |
| Body Fat Percentage(%)   |               | 1.08 | 1.07 1.08 | <0.001  |
| HDL-C(mg/dl)             |               | 0.99 | 0.99 1.00 | <0.001  |
| Total Cholesterol(mg/dl) |               | 1.01 | 1.01 1.01 | <0.001  |

\*Group-I: sedentary-related occupations with low social-economic status, including taxi drivers

†Group-II: non sedentary-related occupations

‡Group-III: sedentary-related occupations with high SES

[9], have poor cardiometabolic health [19, 31], and have poor cognitive health [27]. An increasing number of researchers are beginning to investigate the correlation of a sedentary occupation with MetS or CVD risk [9, 26, 27, 28, 29, 30]. However, most studies on MetS risk factors have focused on lack of physical activity rather than sedentary time or a sedentary occupation. These studies have noted that in adults, spending more time being sedentary increases metabolic risk [38, 39]. Recent research has also demonstrated that lifestyle and SES are significant risk factors for MetS [22, 23] and CVD [22, 40, 41]. Nonetheless, Kim et al. argued that a causal relationship of SES with MetS and CVD risks—as indicated by the Framingham risk score—cannot be established by the current body of cross-sectional evidence [42]. Furthermore, scholars have yet to investigate the role of occupation in MetS risk, with occupation further distinguished by sedentary status and SES associations. In particular, MetS risk is likely to differ between those working in typically sedentary white-collar occupations (such as doctors, professors, managers, and engineers) and those working in sedentary blue-collar occupations (such as administrative staff, service staff, and even taxi drivers).

The current results indicated that those working in sedentary, high-SES-associated occupations are at a higher risk of MetS. We also confirmed the importance of age as a MetS risk factor (Table 4). In particular, we further stratified the cases into three age groups: 21,410 cases were in the younger age group (≤40 years old), 20,565 cases were in the middle-aged group (40–60 years old), and 1,807 cases were in the older age group (>60 years old). Most cases were in the younger age group. Moreover, MetS prevalence was 23.01%, 32.83%, and 35.92% for the younger, middle-aged, and older age groups,

respectively, and the middle-aged significantly higher than younger people. Regarding occupation, sedentary (group-I) occupations were more significantly associated with MetS related to nonsedentary (group-II) occupations (OR = 0.89,  $p = 0.0107$ ). Taxi drivers (33.41%), managers (32.52%) and service staff (29.53%) were the three occupational groups most likely to get MetS. Furthermore, as noted in Table 5, those in sedentary occupations that are associated with a high SES (group-III) were more likely to have MetS compared with those working in sedentary (group-I) occupations associated with no SES in particular (OR = 1.02).

## CONCLUSIONS

Although prolonged sitting is an ostensibly novel risk factor for health outcomes across all ages, its association must be replicated in occupational conditions [31]. In this study, we noted that age and occupation categories were risk factors for MetS, although a sedentary occupation has been known to be unhealthy. The study found that taxi drivers were indeed a high-risk group. However, high-SES-associated but sedentary occupations, such as a lawyer, teacher, accountant, doctor, nurse, engineer, and manager, were also high-risk groups for MetS. A study in South Korea's Gwangju city noted bus drivers to be a high-risk group for MetS and CV [30], but without specifically analyzing the occupational categories in the communities that taxi drivers were living in. In the current study, taxi driving, among eight occupational categories, had the highest MetS prevalence. However, after the eight categories were grouped into three groups, sedentary (group-I) occupations, of which taxi driving falls under, had a lower MetS prevalence than did sedentary and high-SES (group-III)

occupations. This means that in general, high-SES and sedentary workers are more at risk of MetS than their low-SES and sedentary counterparts. Nevertheless, those in non-sedentary (group-II) occupations (e.g., sales and manual labor) had a lower risk of MetS compared with their sedentary counterparts. We recommend for government authorities to focus on taxi drivers, sedentary blue-collar workers, and sedentary high-SES workers in their policies, particularly in tailoring health promotion programs to these groups.

## ACKNOWLEDGEMENTS

We thank the Ministry of Science and Technology for supporting this research (grant numbers: MOST-107-2221-E-161-002 and MOST-108-2221-E-161-003-MY2). We also thank the Far Eastern Memorial Hospital for their support (grant number: NSC-RD-106-1-12-504). The authors would like to express their thanks for the aid rendered by Dr. Yen-Ling Chiu (Nephrologist) and Dr. Yen-Wen Wu (Cardiologist) of Far Eastern Memorial Hospital.

## FOOTNOTES

### Contributors

M.-S.C. (Ming-Shu Chen) conceived and designed the experiments; M.-S.C. and C.-H.C. (Chi-Hao Chiu) performed the experiments; C.-H.C., and S.-H.C. (Shih-Hsin Chen) analyzed the data; M.-S.C. were supervised the study; M.-S.C. contributed investigation material; M.-S.C., C.-H.C., and S.-H.C. wrote this paper together. S.-H.C. submitted this paper.

### Funding

This research was funded by a grant from the Ministry of Science and Technology in Taiwan (grant numbers: MOST-107-2221-E-161-002 & MOST-108-2221-E-161-003-MY2). The authors declare no conflict of interest. The founding sponsors had no role in the design of the study; in the collection, analyses, or interpretation of data; in the writing of the manuscript; or in the decision to publish the results.

## COMPETING INTERESTS

The authors declare no conflicts of interest concerning this study.

### Ethics approval

Ethical approval was obtained from the Research Ethics Review Committee at the Far Eastern Memorial Hospital in

New Taipei City, Taiwan (Institutional Review Board approval number: FEMH-IRB-107126-E, v.02; board meeting and approval date: September 10, 2018). The MJ Health Research Foundation also approved this study. This study also has a PPS receipt (ClinicalTrials.gov ID: NCT04142593, Date: October 25, 2019)

### Data sharing statement

The data used in this study are restricted by the Research Ethics Review Committee of the Far Eastern Memorial Hospital (FEMH-IRB-107126-E, v.02) in order to protect participant privacy. Data are available from Ming-Shu Chen (email: tree1013@gmail.com) for researchers who meet the criteria for access to confidential data.

### Consent to patient and public involvement statement

Not applicable.

## REFERENCES

- 1 R Bethene Ervin. Prevalence of metabolic syndrome among adults 20 years of age and over, by sex, age, race and ethnicity, and body mass index: United states. *National health statistics reports*, 13:1–8, 2009.
- 2 Lee-Ching Hwang, Chyi-Huey Bai, and Chien-Jen Chen. Prevalence of obesity and metabolic syndrome in taiwan. *Journal of the Formosan Medical Association*, 105(8):626–635, 2006.
- 3 Apilak Worachartcheewan, Chanin Nantasenamat, Chartchalerm Isarankura-Na-Ayudhya, Phannee Pidetcha, and Virapong Prachayasittikul. Identification of metabolic syndrome using decision tree analysis. *Diabetes Research and Clinical Practice*, 90(1):e15–e18, 2010.
- 4 Yuan Ching, Yit Chin, Mahenderan Appukutty, Wan Gan, Vasudevan Ramachandran, and Yoke Chan. Prevalence of metabolic syndrome and its associated factors among vegetarians in malaysia. *International journal of environmental research and public health*, 15(9):2031, 2018.
- 5 SuJin Song, Hee Young Paik, Won O Song, and YoonJu Song. Metabolic syndrome risk factors are associated with white rice intake in korean adolescent girls and boys. *British Journal of Nutrition*, 113(3):479–487, 2015.
- 6 Hideo Matsuura, Kanae Mure, Nobuhiro Nishio, Naomi Kitano, Naoko Nagai, and Tatsuya Takeshita. Relationship

- between coffee consumption and prevalence of metabolic syndrome among japanese civil servants. *Journal of epidemiology*, 22(2):160–166, 2012.
- 7 Ming-Shu Chen and Shih-Hsin Chen. A data-driven assessment of the metabolic syndrome criteria for adult health management in taiwan. *International journal of environmental research and public health*, 16(1):92, 2019.
- 8 Xinghua Yang, Qiushan Tao, Feng Sun, and Siyan Zhan. The impact of socioeconomic status on the incidence of metabolic syndrome in a taiwanese health screening population. *International Journal of Public Health*, 57(3):551–559, 2012.
- 9 Markus Strauß, Peter Foshag, Bianca Przybylek, Marc Horlitz, Alejandro Lucia, Fabian Sanchis-Gomar, and Roman Leischik. Occupation and metabolic syndrome: is there correlation? a cross sectional study in different work activity occupations of german firefighters and office workers. *Diabetology & metabolic syndrome*, 8(1):57, 2016.
- 10 Enzo Bonora, Stefan Kiechl, Johann Willeit, Friedrich Oberhollenzer, Georg Egger, Riccardo C Bonadonna, and Michele Muggeo. Carotid atherosclerosis and coronary heart disease in the metabolic syndrome: prospective data from the bruneck study. *Diabetes care*, 26(4):1251–1257, 2003.
- 11 BO Isomaa, Peter Almgren, Tiinamaija Tuomi, Björn Forsén, Kaj Lahti, Michael Nissén, Marja-Riitta Taskinen, and Leif Groop. Cardiovascular morbidity and mortality associated with the metabolic syndrome. *Diabetes care*, 24(4):683–689, 2001.
- 12 Hanna-Maaria Lakka, David E Laaksonen, Timo A Lakka, Leo K Niskanen, Esko Kumpusalo, Jaakko Tuomilehto, and Jukka T Salonen. The metabolic syndrome and total and cardiovascular disease mortality in middle-aged men. *Jama*, 288(21):2709–2716, 2002.
- 13 Joseph Henson, David W Dunstan, Melanie J Davies, and Thomas Yates. Sedentary behaviour as a new behavioural target in the prevention and treatment of type 2 diabetes. *Diabetes/metabolism research and reviews*, 32(S1):213–220, 2016.
- 14 Robert L Hanson, Giuseppina Imperatore, Peter H Bennett, and William C Knowler. Components of the “metabolic syndrome” and incidence of type 2 diabetes. *Diabetes*, 51(10):3120–3127, 2002.
- 15 Peter WF Wilson, Ralph B D’Agostino, Helen Parise, Lisa Sullivan, and James B Meigs. Metabolic syndrome as a precursor of cardiovascular disease and type 2 diabetes mellitus. *Circulation*, 112(20):3066–3072, 2005.
- 16 Ann Marie McNeill, Ronit Katz, Cynthia J Girman, Wayne D Rosamond, Lynne E Wagenknecht, Joshua I Barzilay, Russell P Tracy, Peter J Savage, and Sharon A Jackson. Metabolic syndrome and cardiovascular disease in older people: the cardiovascular health study. *Journal of the American Geriatrics Society*, 54(9):1317–1324, 2006.
- 17 Wei-Wei Zhang, Chun-Yu Liu, Yan-Jiang Wang, Zhi-Qiang Xu, Yang Chen, and Hua-Dong Zhou. Metabolic syndrome increases the risk of stroke: a 5-year follow-up study in a chinese population. *Journal of neurology*, 256(9):1493–1499, 2009.
- 18 MusaSaulawaIbrahim, DongPang, GurchRandhawa, and Yannis Pappas. Risk models and scores for metabolic syndrome: systematic review protocol. *BMJ open*, 9(9):e027326, 2019.
- 19 Kishan Bakrania, Charlotte L Edwardson, Danielle H Bodicoat, Dale W Esliger, Jason MR Gill, Aadil Kazi, Latha Velayudhan, Alan J Sinclair, Naveed Sattar, Stuart JH Biddle, et al. Associations of mutually exclusive categories of physical activity and sedentary time with markers of cardiometabolic health in english adults: a cross-sectional analysis of the health survey for england. *BMC public health*, 16(1):25, 2016.
- 20 Jason Brocato, Fen Wu, Yu Chen, Magdy Shamy, Mansour A Alghamdi, Mamdouh I Khoder, Alser A Alkhatim, Mamdouh H Abdou, and Max Costa. Association between sleeping hours and cardiometabolic risk factors for metabolic syndrome in a saudi arabian population. *BMJ open*, 5(11), 2015.
- 21 Jui Hua Huang, Ren Hau Li, Shu Ling Huang, Hon Ke Sia, Yu Ling Chen, and Feng Cheng Tang. Lifestyle factors and metabolic syndrome among workers: The role of interactions between smoking and alcohol to nutrition and exercise. *International Journal of Environmental Research Public Health*, 12(12):15967–15978, 2015.
- 22 Chen-Mao Liao and Chih-Ming Lin. Life course effects of socioeconomic and lifestyle factors on metabolic syndrome and 10-year risk of cardiovascular disease: A longitudinal study in taiwan adults. *International Journal of Environmental Research and Public Health*, 15(10):2178, 2018.

- 23 R Mehrdad, G Pouryaghoub, and M Moradi. Association between metabolic syndrome and job rank. *Int J Occup Environ Med*, 9(1):45–51, 2018.
- 24 Andrea Bankoski, Tamara B Harris, James J McClain, Robert J Brychta, Paolo Caserotti, Kong Y Chen, David Berrigan, Richard P Troiano, and Annemarie Koster. Sedentary activity associated with metabolic syndrome independent of physical activity. *Diabetes care*, 34(2):497–503, 2011.
- 25 Neville Owen, Geneviève N Healy, Charles E Matthews, and David W Dunstan. Too much sitting: the population-health science of sedentary behavior. *Exercise and sport sciences reviews*, 38(3):105, 2010.
- 26 Maria Aguilar, Taft Bhuket, Sharon Torres, Benny Liu, and Robert J Wong. Prevalence of the metabolic syndrome in the united states, 2003-2012. *Jama*, 313(19):1973–1974, 2015.
- 27 Kishan Bakrania, Charlotte L Edwardson, Kamlesh Khunti, Stephan Bandelow, Melanie J Davies, and Thomas Yates. Associations between sedentary behaviours and cognitive function: cross-sectional and prospective findings from the uk biobank. *American Journal of Epidemiology*, 2017.
- 28 Duk Cho and Jung-Wan Koo. Differences in metabolic syndrome prevalence by employment type and sex. *International journal of environmental research and public health*, 15(9):1798, 2018.
- 29 Asuka Sakuraya, Kazuhiro Watanabe, Norito Kawakami, Kotaro Imamura, Emiko Ando, Yumi Asai, Hisashi Eguchi, Yuka Kobayashi, Norimitsu Nishida, Hideaki Arima, et al. Work-related psychosocial factors and onset of metabolic syndrome among workers: a systematic review and meta-analysis protocol. *BMJ open*, 7(6):e016716, 2017.
- 30 Seung Yong Shin, Chul Gab Lee, Han Soo Song, Sul Ha Kim, Hyun Seung Lee, Min Soo Jung, and Sang Kon Yoo. Cardiovascular disease risk of bus drivers in a city of Korea. *Annals of occupational and environmental medicine*, 25(1):34, 2013.
- 31 Chutima Jalayondeja, Wattana Jalayondeja, Keerin Mekhora, Petcharatana Bhuanantanondh, Asadang Dusadi-Isariyavong, and Rujiret Upiriyasakul. Break in sedentary behavior reduces the risk of noncommunicable diseases and cardiometabolic risk factors among workers in a petroleum company. *International journal of environmental research and public health*, 14(5):501, 2017.
- 32 Mohamed Hamad Al-Thani, Sohaila Cheema, Javaid Sheikh, Ravinder Mamtani, Albert B Lowenfels, Walaa Fattah Al-Chetachi, Badria Ali Almalki, Shamseldin Ali Hassan Khalifa, Ahmad Omar Haj Bakri, Patrick Maisonneuve, et al. Prevalence and determinants of metabolic syndrome in qatar: results from a national health survey. *BMJ open*, 6(9), 2016.
- 33 Anne Kouvonen, Mika Kivimäki, Marko Elovainio, Jaana Pentti, Anne Linna, Marianna Virtanen, and Jussi Vahtera. Effort/reward imbalance and sedentary lifestyle: an observational study in a large occupational cohort. *Occupational and environmental medicine*, 63(6):422–427, 2006.
- 34 Li-Yu Wu. The survey on self-care physiological status and preventive health behaviour of taxi driver - an example of the taxi driver in taipei. *Health Promotion Health Education Journal*, (23):1–13, 2003.
- 35 Pamela S Cain and Donald J Treiman. The dictionary of occupational titles as a source of occupational data. *American Sociological Review*, pages 253–278, 1981.
- 36 Earl S Ford, Harold W Kohl, Ali H Mokdad, and Umed A Ajani. Sedentary behavior, physical activity, and the metabolic syndrome among us adults. *Obesity*, 13(3):608–614, 2005.
- 37 Katrien Wijndaele, N Duvigneaud, Lynn Matton, William Duquet, Christophe Delecluse, Martine Thomis, Gaston Beunen, Johan Lefevre, and RM Philippaerts. Sedentary behaviour, physical activity and a continuous metabolic syndrome risk score in adults. *European journal of clinical nutrition*, 63(3):421, 2009.
- 38 Genevieve N Healy, Katrien Wijndaele, David W Dunstan, Jonathan E Shaw, Jo Salmon, Paul Z Zimmet, and Neville Owen. Objectively measured sedentary time, physical activity, and metabolic risk. *Diabetes care*, 31(2):369–371, 2008.
- 39 RJ Shephard. Breaks in sedentary time: Beneficial associations with metabolic risk. Healy GN, Dunstan DW, Salmon J, et al (the univ of queensland, brisbane, australia; the international diabetes inst, melbourne, australia; deakin univ, melbourne, australia; et al) *Diabetes care* 31: 661-666, 2008. *Year Book of Sports Medicine*, 2010:183–185, 2010.
- 40 Eric B Loucks, David H Rehkopf, Rebecca C Thurston, and Ichiro Kawachi. Socioeconomic disparities in

1  
2  
3 metabolic syndrome differ by gender: evidence from  
4 nhanes iii. *Annals of epidemiology*, 17(1):19–26, 2007.  
5

6 41 Sunmi Yoo, Hong-Jun Cho, and Young-Ho Khang.  
7 General and abdominal obesity in south korea, 1998–  
8 2007: gender and socioeconomic differences. *Preventive*  
9 *medicine*, 51(6):460–465, 2010.  
10

11 42 Ji Young Kim, Sung Hi Kim, and Yoon Jeong Cho. So-  
12 cioeconomic status in association with metabolic syn-  
13 drome and coronary heart disease risk. *Korean journal*  
14 *of family medicine*, 34(2):131, 2013.  
15  
16  
17  
18  
19  
20  
21  
22  
23  
24  
25  
26  
27  
28  
29  
30  
31  
32  
33  
34  
35  
36  
37  
38  
39  
40  
41  
42  
43  
44  
45  
46  
47  
48  
49  
50  
51  
52  
53  
54  
55  
56  
57  
58  
59  
60

**ClinicalTrials.gov PRS DRAFT Receipt (Working Version)**

Last Update: 10/25/2019 04:49

**ClinicalTrials.gov ID: NCT04142593****Study Identification**

Unique Protocol ID: 107126-E

Brief Title: Application of Decision Analysis Techniques' in Huge Health-checkup Database to Explore the High-risk Group With Metabolic Syndrome

NOTE : Brief Title should have no more than 120 characters.

Official Title: Application of Decision Analysis Techniques' in Huge Health-checkup Database to Explore the High-risk Group With Metabolic Syndrome

Secondary IDs:

**Study Status**

Record Verification: October 2019

Overall Status: Active, not recruiting

Study Start: September 1, 2018 [Actual]

Primary Completion: September 15, 2019 [Actual]

Study Completion: September 30, 2021 [Anticipated]

**Sponsor/Collaborators**

Sponsor: Far Eastern Memorial Hospital

Responsible Party: Sponsor

Collaborators:

**Oversight**

U.S. FDA-regulated Drug: No

U.S. FDA-regulated Device: No

U.S. FDA IND/IDE: No

Human Subjects Review: Board Status: Exempt

Data Monitoring:

**Study Description**

Brief Summary: Application of Decision Analysis Techniques' in Huge Health-checkup Database to Explore the High-risk Group With Metabolic Syndrome (MetS)

Detailed Description: According to the American Heart Association#AHA#modified Adult Treatment Panel III#ATP-III# and the criteria of Health Promotion Administration, Taiwan. Five indices are used to define metabolic syndrome#MetS): including waist circumference #WC), high blood pressure#H/P#, fasting plasma glucose#FPG#, triglyceride#TG#, and high-density lipoprotein-cholesterol#HDL-C#. The recent researches showed us, there was no research applying the five criteria into their decision model. This study proposal will be the first study which evaluated the importance of the criteria related to apply these indices and decision model into the clinic for risk factors assessment.

This study was divided into 2 stages: (1) to analyze the big database of health examination to find out the major decision-making analysis module of MetS, including the level of importance and decision-making weight of 5 indicators, which can be provided as reference for suggestions on clinical medical treatments or health education focuses of health management of sub-health population; (2) to analyze other demographic variables of the database (educational background, residence, occupation, etc.) and the variables affecting health patterns (including smoking, drinking, long-term sitting work pattern) to find out the important variables affecting high risk group for MetS among populations of all ages, in order to investigate the improvement strategies for early prevention or intervention of important variables. As aging society is coming, it is estimated that the elderly people over the age of 65 in Taiwan will reach 20% by 2025. According to the estimation of Executive Yuan, the growth rate of healthcare service industry will reach at least 17%, and the annual output value will reach USD 18 billion. Therefore, this study intends to develop strategies for preventing chronic illness in the middle-aged and elderly people and find out the characteristic variables of high risk group according to different age groups to further reduce the incidence of MetS or CVD.

## Conditions

Conditions: Mets

Keywords: Metabolic Syndrome#MetS#

Classification

Decision Tree

Risk Factors Assessment

## Study Design

Study Type: Observational [Patient Registry]

Observational Study Model: Other

Time Perspective: Other

Biospecimen Retention: None Retained

Biospecimen Description:

Enrollment: 100000 [Anticipated]

Number of Groups/Cohorts: 1

Target Follow-Up Duration: 10 Years

## Groups and Interventions

Intervention Details:

no

no

## Outcome Measures

Primary Outcome Measure:

1. analyze the big database of health examination to find out the major decision-making analysis module of MetS  
This study plans to use decision analysis and new statistical techniques, including decision tree algorithms; random forest algorithms; multivariate linear regression combinations and hierarchical linear models, and with a large number of health databases.

Analysis, through the comprehensive health check report and physiological indicator data accumulated over many years, find more key variables or physiological indicators that can be used to evaluate MetS or CVD, in order to provide government departments, medical institutions or nationals early Detect or prevent, and further reduce the overall rate of MetS in Taiwan at this stage.

[Time Frame: no]

## Eligibility

**Study Population:** As aging society is coming, it is estimated that the elderly people over the age of 65 in Taiwan will reach 20% by 2025. According to the estimation of Executive Yuan, the growth rate of healthcare service industry will reach at least 17%, and the annual output value will reach USD 18 billion. Therefore, this study intends to develop strategies for preventing chronic illness in the middle-aged and elderly people and find out the characteristic variables of high risk group according to different age groups to further reduce the incidence of MetS or CVD.

**Sampling Method:** Non-Probability Sample

**Minimum Age:**

**Maximum Age:**

**Sex:** All

**Gender Based:** No

**Accepts Healthy Volunteers:** No

**Criteria:** Inclusion Criteria:

1. In 2006-2016, the MJ Health Research Foundation's member, which continuously tested twice or more of the annual health check database, about 90,000 people.
2. The person who was in charge of the taxi driver health checkup project commissioned by the New North City Transportation Bureau at Far Eastern Memorial Hospital, data period 2012-2016, about 2,000 people.

**Exclusion Criteria:**

- no

## Contacts/Locations

**Central Contact Person:** Ming-Shu Chen, PhD  
Telephone: +886-77388000 Ext. 6223  
Email: tree@mail.oit.edu.tw

**Central Contact Backup:**



Study Officials: Ming-Shu Chen, PhD  
Study Director  
Oriental Institute of Technology

Locations: **Taiwan**  
Oriental Institute of Technology / Far Eastern Memorial Hospital  
New Taipei City, Pan-Chiao Dist., Taiwan, 22061  
Contact: Ming-Shu Chen, PhD

### IPDSharing

Plan to Share IPD: No  
no

### References

Citations:

Links:

Available IPD/Information:

U.S. National Library of Medicine | U.S. National Institutes of Health | U.S. Department of Health & Human Services

Peer review only

BMJ Open  
**亞東紀念醫院人體試驗審議委員會**

Research Ethics Review Committee

Far Eastern Memorial Hospital

21, Sec. 2, Nanya S. Rd., Banciao Dist., New Taipei City 220, Taiwan (R.O.C.)

Tel : (02)7728-2152 Fax : (02)7728-1592

Email : irb@mail.femh.org.tw

**人體試驗/研究許可書**

西元二〇一八年九月十日

案件編號：107126-E

計畫名稱：應用決策分析技術於巨量健檢資料庫以探討新陳代謝症候群之高危險族群

計畫主持人：陳銘樹

共/協同主持人：吳彥雯

研究成員：邱琦皓、吳冠葦、楊雅如、葉欣

計畫書版本：Version6, 20180829, FEMH-107126-E

受試者說明及同意書版本：免除受試者說明及同意書

中文摘要：Version2,20180830, FEMH-107126-E

英文摘要：Version1,20180620, FEMH-107126-E

試驗期間：2018年9月10日至2021年9月1日

試驗人數：100000 (亞東：2000)

追蹤審查頻率：一年

上述計畫已於本院人體試驗審議委員會審查，同意人體試驗/研究進行。有效期限自二〇一八年九月十日至二〇一九年九月十日。(依照 ICH-GCP 規定，臨床試驗每屆滿一年，人體試驗委員會必須重新審查是否繼續進行。請於有效期限到期二個月前繳交持續審查報告以利本會進行審查)

主任委員 張淑雯

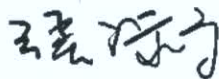

**Permission of Clinical Trial  
 Far Eastern Memorial Hospital**

Date: September 10, 2018

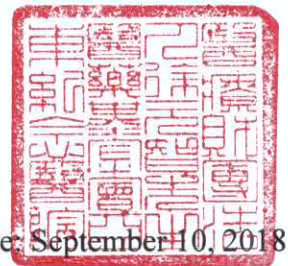

FEMH No.: 107126-E

Protocol Title: Application of decision analysis techniques' in huge health-checkup database to explore the high-risk group with metabolic syndrome (MetS)

Principal investigator: Ming-Shu Chen

Co- investigator: Yen-Wen Wu

Research Associate: Chi-Hao Chiu, Guan-Ting Wu, Ya-Ru Yang, Xin Ye

Protocol Version: Version6, 20180829, FEMH-107126-E

Informed Consent Form: Waiver

Chinese Synopsis: Version2,20180830, FEMH-107126-E

English Synopsis: Version1,20180620, FEMH-107126-E

Trial period: September 10, 2018 to September 1, 2021

Number of subjects: 100000 (FEMH: 2000)

Continuing review frequency: One year

Above study has been approved by the Research Ethics Review Committee of the Far Eastern Memorial Hospital and valid since September 10, 2018 to September 10, 2019. The Committee is organized and operates according to Good Clinical Practice and the applicable laws and regulations. Apply for a continuing review not less than two months prior to approval expiration date.

Shu-Wen Chang M.D., Professor of Ophthalmology

Chairman

Research Ethics Review Committee

# BMJ Open

## Risk assessment of metabolic syndrome prevalence involving sedentary occupations and socioeconomic status

|                                 |                                                                                                                                                                                                                                                                  |
|---------------------------------|------------------------------------------------------------------------------------------------------------------------------------------------------------------------------------------------------------------------------------------------------------------|
| Journal:                        | <i>BMJ Open</i>                                                                                                                                                                                                                                                  |
| Manuscript ID                   | bmjopen-2020-042802.R1                                                                                                                                                                                                                                           |
| Article Type:                   | Original research                                                                                                                                                                                                                                                |
| Date Submitted by the Author:   | 11-Mar-2021                                                                                                                                                                                                                                                      |
| Complete List of Authors:       | Chen, Ming-Shu; Oriental Institute of Technology, Department of Health Care Administration<br>Chiu, Chi-Hao; Far Eastern Memorial Hospital, Department of Medical Affairs<br>Chen, Shih-Hsin; Cheng Shiu University, Information Management                      |
| <b>Primary Subject Heading</b>: | Occupational and environmental medicine                                                                                                                                                                                                                          |
| Secondary Subject Heading:      | Health informatics                                                                                                                                                                                                                                               |
| Keywords:                       | Other metabolic, e.g. iron, porphyria < DIABETES & ENDOCRINOLOGY, Health policy < HEALTH SERVICES ADMINISTRATION & MANAGEMENT, Risk management < HEALTH SERVICES ADMINISTRATION & MANAGEMENT, PUBLIC HEALTH, Health informatics < BIOTECHNOLOGY & BIOINFORMATICS |
|                                 |                                                                                                                                                                                                                                                                  |

SCHOLARONE™  
Manuscripts

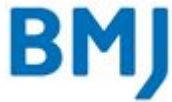

I, the Submitting Author has the right to grant and does grant on behalf of all authors of the Work (as defined in the below author licence), an exclusive licence and/or a non-exclusive licence for contributions from authors who are: i) UK Crown employees; ii) where BMJ has agreed a CC-BY licence shall apply, and/or iii) in accordance with the terms applicable for US Federal Government officers or employees acting as part of their official duties; on a worldwide, perpetual, irrevocable, royalty-free basis to BMJ Publishing Group Ltd ("BMJ") its licensees and where the relevant Journal is co-owned by BMJ to the co-owners of the Journal, to publish the Work in this journal and any other BMJ products and to exploit all rights, as set out in our [licence](#).

The Submitting Author accepts and understands that any supply made under these terms is made by BMJ to the Submitting Author unless you are acting as an employee on behalf of your employer or a postgraduate student of an affiliated institution which is paying any applicable article publishing charge ("APC") for Open Access articles. Where the Submitting Author wishes to make the Work available on an Open Access basis (and intends to pay the relevant APC), the terms of reuse of such Open Access shall be governed by a Creative Commons licence – details of these licences and which [Creative Commons](#) licence will apply to this Work are set out in our licence referred to above.

Other than as permitted in any relevant BMJ Author's Self Archiving Policies, I confirm this Work has not been accepted for publication elsewhere, is not being considered for publication elsewhere and does not duplicate material already published. I confirm all authors consent to publication of this Work and authorise the granting of this licence.

# Risk assessment of metabolic syndrome prevalence involving sedentary occupations and socioeconomic status

Ming-Shu Chen<sup>a</sup>, Chi-Hao Chiu<sup>b</sup>, and Shih-Hsin Chen<sup>\*c</sup>

<sup>a</sup>Department of Healthcare Administration, Oriental Institute of Technology, No.58, Sec. 2, Sichuan Rd., Pan-Chiao Dist., New Taipei City 22061, Taiwan (R.O.C.)

<sup>b</sup>Department of Medical Affairs, Far Eastern Memorial Hospital, No.21, Sec. 2, Nanya S. Rd., Banqiao Dist., New Taipei City 22061, Taiwan (R.O.C.)

<sup>c</sup>Department of Information Management, Cheng Shiu University, No.840, Chengcing Rd., Niasong Dist., Kaohsiung City 83347, Taiwan (R.O.C.)

## ABSTRACT

**Objectives:** To determine the association between metabolic syndrome (MetS) prevalence and occupation—distinguished by being sedentary and nonsedentary and by socioeconomic status (SES). There are eight occupation categories are extensively considered. Numerous occupations, lawyers, teachers, engineers, senior section chiefs of enterprises, taxi driving, and so on are considered.

**Methods:** Two data sets with 64,578 cases were analyzed. MetS was identified according to criteria of the modified Adult Treatment Panel III. A multiple logistic regression algorithm was used to test factors for three age segments. R for Windows (version 3.5.1) was used for all statistical analyses. **Results:** MetS prevalence was 23.01%, 32.83%, and 35.92% for the younger, middle-aged, and older age groups, respectively. MetS was significantly more likely for sedentary occupations (OR = 0.89,  $p < 0.001$ ) including taxi drivers (33.41%), managers (32.52%), and workers in the service sector (29.53%). Taxi drivers were most likely to have MetS. Those working in occupations that are sedentary and associated with a high SES were more likely to have MetS (OR = 1.02) compared with those working in sedentary occupations associated with no particular SES.

**Conclusions:** Because high-SES and sedentary occupations increase MetS risk, we suggest for the authorities to focus them, specifically in tracking their trends for MetS indexes and tailoring health promotion programs to these groups.

**Keywords:** Sedentary occupation, Metabolic Syndrome, Risk assessment, Regression Model

### Strengths and limitations of this study

- We might be the first one to evaluate sedentary/non-sedentary occupations and by SES extensively.
- Two data sets with 64,578 cases were employed.
- Three occupation groups include general sedentary-related, non-sedentary related, and sedentary-related with high-SES.
- Chi-square test are used to evaluate the categorical factors of in three age groups and occupations, and multiple logistic regression tests the risk-factor associations
- The main limitations of this study is that the data was only collected in Taiwan, which might be not the same for other countries.

## INTRODUCTION

MetS has been established as a public health concern in Western countries and is an increasingly severe public health problem in numerous countries. In the United States, 34% of adults satisfy the MetS criteria, which was formulated in the National Cholesterol Education Program Adult Treatment Panel (NCEP ATP III); in particular, US adults aged more than 60 years are more prone to having MetS [1]. The health status of the Taiwanese population was estimated in 2002 using the data of 7566 participants in a nationwide cross-sectional population-based survey, named the Taiwanese Survey on

Corresponding author: shchen@csu.edu.tw

Prevalence of Hyperglycemia, Hyperlipidemia, and Hypertension (TwSHHH). Hwang et al. [2] reported that the prevalence of MetS in women increases rapidly after the menopausal period to become higher than that in men; they also noted MetS' high correlations with age as well as overweight and obesity. In other Asian countries, MetS is also an important health issue, and studies on MetS have been conducted in Thailand [3], Malaysia [4], South Korea [5], and Japan [6] in addition to studies in Taiwan [2, 7, 8].

MetS is highly correlated with overweight and obesity [2, 9], and it comprises a constellation of interrelated metabolic disorders—including hypertension [10], type 2 diabetes mellitus (T2DM) [11, 12, 13], cardiovascular disease (CVD) [13, 14], and stroke [15]. In addition, people with MetS have fivefold diabetes [16]. The scholarly evidence has also preponderantly indicated that individuals with MetS or a sedentary occupation have increased the incidence of T2DM and coronary heart disease as well as increased mortality due to CVD [11, 12, 13, 14, 17]. The other study also pointed out the reduced muscular strength is also associated with increased CVD and CVD-related mortality [18].

As a result, the reasons causing MetS must be investigated. The risk factors for MetS include aging, sedentary, long working hours, physical inactivity, Western diet, sleep duration greater than 7 hours [19], and high occupational stress [20]. Socioeconomic status (SES) and lifestyle are the possible risk factors for MetS [21, 22]. Of these factors, prolonged sitting is an ostensible risk factor for negative health outcomes across all ages due to the rapid automation of the workplace [23, 24]. More recent studies have begun discussing the correlation of sedentary occupation with MetS or CVD risk [9, 25, 26, 27, 28, 29, 30].

Bakrania et al. [26] demonstrated that sedentary behavior affects not only physical but also cognitive health. Leischik et al. [31] compared the 97 firefighters, 55 policemen, and 46 sedentary office workers in German. Sedentary occupations show to be associated with obesity and metabolic syndrome in middle-aged men. The other study on workers in a petroleum company reported that sedentary behavior—specifically for 10 h/day with two-thirds of those 10 h spent sitting at work—was significantly associated with cardiometabolic risk factors [32]. An individual having a sedentary occupation is significantly more likely to be obese. Strauß et al. [9] found that office workers had a significantly greater abdominal waist circumference (WC) than do firefighters and that 33% of sedentary German office workers had MetS. Later on, Strauß et al. [33] further evaluated 10-year cardiovascular risk for 46 office workers in German by using the Framingham score. The office workers has tendency cardiovascular risk and higher rate

of MetS.

However, its risk association must be replicated with respect to occupational condition or SES [22, 32, 34, 35]. SES is a combination of salary, social status, and education and can be evaluated by occupation or work status [36]. Al-Thani et al. [34] shown that no statistical significant association was founded for occupation. Mehrdad et al. [22] found the association between MetS and three job ranks in a company didn't cause significant difference. Therefore, this study focused on MetS prevalence—and the related chronic disease biochemical test indexes—with respect to occupation among adults in Taiwan. The current study focused on sedentary occupations and occupations associated with different SES condition. We selected taxi driving as the representative sedentary occupation, in addition to analyzing some high-SES-associated occupations.

Finally, although there are numerous studies that include some occupations or SES condition [22, 32, 34, 35], this research might be the first one to study those in sedentary or more high-SES-associated occupations, especially occupations that increase MetS risk which haven't explored yet by prior researches. There are eight major occupations and then to be allocated in three groups, including general sedentary occupation, non-sedentary occupation, and sedentary occupations with high-SES. Our hypothesis includes whether there is a difference between the sedentary occupation, and high-SES would cause higher MetS prevalence. The next section explains the methods used in this paper.

## METHODS

### Definition of a sedentary occupation and SES

According to the US Department of Labor's Dictionary of Occupational Titles, sedentary work is the occasional exertion of >10 lbs of force and/or a frequent exertion of a negligible amount of force. In this definition, "occasional" and "frequent" are defined as being present <1/3 and 1/3–2/3 of the time, respectively. Such force can be used to lift, carry, push, pull, or move objects—including the human body. Sedentary work involves sitting most of the time, but it may involve walking or standing for brief periods. Thus, a job was defined to be sedentary if walking and standing are required only occasionally and all other sedentary criteria are met [37]. In this research, we select the taxi drivers, clerical, and administrative jobs as the representative belonged to the sedentary-related occupations in comparison with other non-sedentary-related, and sedentary-related high-SES jobs in the analysis to compare three categories of occupations. The rationale

<https://www.thehortongroup.com/resources/the-strength-test-levels>

and hypothesis of this study are based on the previous studies to determine whether sedentary-related occupations have a higher risk of developing MetS, and at the same time compare the differences between high-SES and non-SES in sedentary occupations.

We employed eight occupational categories: Professional-1, Technical-2, Managerial-3, Sales-4, Service-5, Clerical and Administrative-6, Manual Labor-7, and Taxi Driving-8. The detail occupations of the Professional-1, Technical-2, and Managerial-3 categories are shown in Table 1. According to Jans et al. [38], there are differences in sitting time among occupational groups as well as business sectors in Dutch. We put the occupation categories into three groups: general sedentary-related (Group-I), non sedentary-related (Group-II), and sedentary-related and high-SES (Group-III), based on occupational environment and social-economic status (SES) of occupations. The arrangement of the eight occupations is illustrated in Table 2.

### Definition of MetS

MetS was defined in this study according to guidelines from the Health Promotion Administration of Taiwan's Ministry of Health and Welfare. MetS prevalence was evaluated using the definitions of the modified ATP III and the MetS criteria for Taiwanese (MetS-TW). Five major factors were used to determine whether a person had MetS: WC, high blood pressure, fasting blood sugar (BS), triglyceride (TG) level, and HDL-C level. High blood pressure included the rates of systolic blood pressure (SBP) and diastolic blood pressure (DBP). Specifically, a Taiwanese person is defined as having MetS if they have three or more of the following five conditions in the ATP III: abdominal obesity, high TG, low HDL-C, hypertension, and hyperglycemia; the rules are detailed in Table 3.

### Data resource and data collection

We obtained two datasets from the New Taipei City Government Annual Taxi Health Examination Survey and MJ Health Check-Up-Based Population Database (MJPD). The duration of the first dataset covered the 2012–2016 period and was conducted by Far Eastern Memorial Hospital (FEMH)<sup>2</sup>. The second dataset MJPD was collected from four MJ clinics, which provide periodical health examinations to their members, which is accessible to researchers upon request<sup>3</sup>.

All of the data sets used in this study were authorized and

<sup>2</sup>FEMH is one of the exclusive hospitals that mainly undertakes the annual health check-up of taxi drivers in New Taipei City, and it is also the hospital with the largest number of services and the largest hospital in New Taipei City.

<sup>3</sup><http://www.mjhrf.org/main/page/release1/en/release01>

given to this study's researchers by the MJPD Health Research Foundation with FEMH IRB approval. The laboratory data of the two databases were obtained from the same biochemical examination apparatus (Hitachi-7600). The two datasets conform to the ISO-15189 guidelines. Regarding ethical data use, the protocol of this study was approved by the Research Ethics Review Committee at FEMH (FEMH-IRB-107126-E and ) and the MJ Health Research Foundation.

### Data preprocessing

The FEMH database had 2,294 cases of taxi drivers (2,182 male and 112 female). To ensure representativeness in the analysis, we excluded female taxi drivers because their data only comprised 4.87% of the data set. The MJPD database had 117,076 cases (62,396 male and 54,680 female). We also excluded female taxi drivers to control for the effects of gender. Therefore, we analyzed data of 64,578 cases: 2,182 cases of taxi drivers from the FEMH database, and 62,396 health screening cases from the MJ database. After combining the two databases, MetS was identified based on the NCEP ATP III MetS criteria, and MetS prevalence was calculated.

Because age has been demonstrated to be an essential influence on MetS risk, we stratified the data into  $\leq 40$ -, 40–60-, and  $\geq 60$ -year-old groups. We focused on the effect on MetS risk from occupation—distinguished first by whether the occupation is sedentary versus or non-sedentary and second, by the occupation's association with SES.

### Statistical analysis

The statistical analysis and graphs in this study were performed using an R (v3.5.1) package for multiple logistic regression. A p-value of  $< 0.05$  indicated statistical significance between the two test populations. In the univariate analysis, a two-sample independent *t* test was adopted to analyze the difference in the mean value of continuous variables between participants with and without MetS. An exact chi-square test was used to define the differences between categorical variables. Multiple logistic regression was used to determine the effect of all influential variables.

## RESULTS

We only analyzed the data of those who first, were taxi drivers and second, had two records in the database. Any personal information of all individuals was removed to protect their privacy. We analyzed 201,087 records in total, including those for gender, height, weight, WC, blood pressure, TG level, HDL-C, SBP, DBP, and fasting BS. We computed the BMI

**Table 1** Detail Occupation groups in the Professional-1, Technical-2, and Managerial-3 categories

| Categories     | Occupations                                                                  |
|----------------|------------------------------------------------------------------------------|
| Professional-1 | Lawyers, teachers, accountants, and nurses                                   |
| Technical-2    | Engineers, architects, and programmers                                       |
| Managerial-3   | Senior executives of government departments or section chiefs of enterprises |

**Table 2** Sedentary versus non-sedentary occupation categories association with SES

| Group number | Type                           | Categories                                                  |
|--------------|--------------------------------|-------------------------------------------------------------|
| Group-I      | General sedentary-related      | Service-5, Clerical and Administrative-6, and Taxi Driver-8 |
| Group-II     | Non sedentary-related          | Sales-4, and Manual Labor-7                                 |
| Group-III    | Sedentary-related and high-SES | Professional-1, Technical-2, and Managerial-3               |

**Table 3** MetS criteria

| No. | Factors                                      | Abnormal Condition                       |
|-----|----------------------------------------------|------------------------------------------|
| 1   | Fasting Plasma Glucose (FPG)                 | FPG $\geq$ 100mg/dL                      |
| 2   | High Density Lipoprotein Cholesterol (HDL-C) | Male $<$ 40mg/dL or Female $<$ 50mg/dL   |
| 3   | High Blood Pressure                          | SBP $\geq$ 130mmHg or DBP $\geq$ 85mmHg  |
| 4   | Triglyceride (TG)                            | TG $\geq$ 150mg/dL                       |
| 5   | Waist Circumference (WC)                     | Male $\geq$ 90 cm or Female $\geq$ 80 cm |

from the height and weight data. In the next sub-sections, we present the descriptive statistics and the correlations among factors.

### Descriptive Statistics

After processing the data, the original database comprised 64,578 cases: 2,182 cases of taxi drivers from the FEMH database, and 62,396 health screening cases from the MJ database. We excluded the data entries with the occupational category “Others” and with “missing values,” leaving 43,782 cases for data analysis. Of these 43,782 cases, 31,454 did not have MetS and 12,328 had MetS. MetS prevalence in this study thus was 28.16%. We conducted comparisons for the various physiological parameters, such as weight, SBP, and DBP (Table 4). Compared with those with MetS, individuals without MetS were healthier: their weight, SBP, WC, TG level, and BMI were lower and their HDL-C level was greater. All characteristics were significantly related to MetS ( $p < 0.001$ ).

We further stratified the cases into three age groups: 21,410 cases were in the younger age group ( $\leq 40$  years old), 20,565 cases were in the middle-aged group (40–60 years old), and 1,807 cases were in the older age group ( $> 60$  years old). Table 5 details the age-stratified data—most cases were aged  $\leq 40$  years. MetS prevalence was 23.01%, 32.83%, and 35.92% for the younger, middle-aged, and older age groups, respectively.

The result is consistent with studies reporting that MetS becomes more likely with age [1, 15]. Furthermore, as noted in table 5, all factors—such as weight, SBP, DBP, and WC—were significantly related ( $p < 0.001$ ) to MetS prevalence for all age groups, identical to the findings for the unstratified data in Table 4.

### Chi-square exact test and multiple logistic regression analysis

Because some variables for characteristics were categorical, we used a chi-square test to analyze the relationships among them in Table 6. Age and occupation were significantly associated with MetS ( $p < 0.001$ ). To explore the public perception of risk indicators of MetS, we further analyzed the eight aforementioned occupational categories. All occupation categories were significantly associated with MetS ( $p < 0.001$ ). Among the occupations, taxi driving had the highest MetS prevalence (33.41%), which was much higher than the 28.16% prevalence in the unstratified data. The occupational categories with the highest MetS prevalence were Taxi Driver-8, Managerial-3, and Sales-4 at 33.41%, 32.52%, and 29.53%, respectively.

We analyzed the associations between major factors in a multiple logistic regression model in Table 7. BMI (%), body weight (kg), body fat percentage (%) and total cholesterol (mg/dL) were revealed to be the important risk factors for MetS ( $p < 0.001$ ). Age is the most important risk indicator,



**Table 4** Comparison of MetS characteristics

| Variables               | Metabolism syndrome |         |                       |        |                    |         | p-value |
|-------------------------|---------------------|---------|-----------------------|--------|--------------------|---------|---------|
|                         | Total               |         | Without<br>(n=31,454) |        | With<br>(n=12,328) |         |         |
|                         | Mean                | (SD)    | Mean                  | (SD)   | Mean               | (SD)    |         |
| Weight(Kg)              | 72.8                | (11.3)  | 69.7                  | (9.3)  | 80.9               | (12.1)  | <0.001  |
| SBP(mmHg)               | 120.6               | (15.0)  | 116.8                 | (13.0) | 130.3              | (15.4)  | <0.001  |
| DBP(mmHg)               | 77.4                | (10.5)  | 74.8                  | (9.2)  | 84.0               | (10.6)  | <0.001  |
| WC(cm)                  | 84.1                | (8.7)   | 81.2                  | (7.0)  | 91.5               | (8.3)   | <0.001  |
| Body Fat (%)            | 24.3                | (5.5)   | 22.8                  | (4.8)  | 28.0               | (5.3)   | <0.001  |
| FPG(mg/dl)              | 103.2               | (18.7)  | 99.5                  | (12.6) | 112.6              | (26.8)  | <0.001  |
| TG(mg/dl)               | 136.8               | (103.5) | 113.6                 | (74.7) | 196.0              | (137.7) | <0.001  |
| CHOL                    | 197.5               | (34.2)  | 195.4                 | (33.1) | 202.8              | (36.1)  | <0.001  |
| HDL-C(mg/dl)            | 52.0                | (11.4)  | 54.3                  | (11.3) | 46.0               | (9.3)   | <0.001  |
| LDL-C(mg/dl)            | 124.8               | (32.1)  | 122.9                 | (31.1) | 129.6              | (33.9)  | <0.001  |
| BMI(Kg/m <sup>2</sup> ) | 24.8                | (3.4)   | 23.7                  | (2.7)  | 27.4               | (3.5)   | <0.001  |

**Table 5** Comparisons of MetS characteristics stratified by age

| Variables               | Age≤40<br>(n=21,410) |              | p-value | 40<Age≤60<br>(n=20,565) |              | p-value | Age>60<br>(n=1,807) |              | p-value |
|-------------------------|----------------------|--------------|---------|-------------------------|--------------|---------|---------------------|--------------|---------|
|                         | Non<br>MetS          | MetS         |         | Non<br>MetS             | MetS         |         | Non<br>MetS         | MetS         |         |
| Weight(Kg)              | 70.8(9.7)            | 85.1(12.5)   | <0.001  | 68.7(8.5)               | 78.6(11.0)   | <0.001  | 64.9(8.5)           | 73.5(9.6)    | <0.001  |
| SBP(mmHg)               | 115.9(11.7)          | 128.9(14.7)  | <0.001  | 117.1(13.7)             | 130.5(15.6)  | <0.001  | 125.8(17.2)         | 139.2(16.2)  | <0.001  |
| DBP(mmHg)               | 73.4(8.6)            | 82.4(10.6)   | <0.001  | 76.1(9.5)               | 85.0(10.5)   | <0.001  | 77.8(10.5)          | 85.0(10.0)   | <0.001  |
| WC(cm)                  | 80.8(7.2)            | 92.6(8.6)    | <0.001  | 81.6(6.7)               | 90.6(8.1)    | <0.001  | 83.0(7.4)           | 91.5(8.0)    | <0.001  |
| Body Fat (%)            | 23.3(5.0)            | 29.6(5.3)    | <0.001  | 22.3(4.5)               | 27.0(5.0)    | <0.001  | 21.3(4.8)           | 25.8(5.4)    | <0.001  |
| FPG(mg/dl)              | 97.8(9.3)            | 108.5(22.8)  | <0.001  | 101.2(14.7)             | 114.6(27.7)  | <0.001  | 103.3(21.0)         | 122.0(37.6)  | <0.001  |
| TG(mg/dl)               | 109.1(74.0)          | 198.9(148.4) | <0.001  | 120.1(77.0)             | 196.0(132.2) | <0.001  | 101.1(47.2)         | 173.7(103.5) | <0.001  |
| CHOL                    | 192.1(32.8)          | 203.5(36.2)  | <0.001  | 199.6(33.0)             | 203.1(36.0)  | <0.001  | 192.0(34.0)         | 194.6(35.3)  | <0.001  |
| HDL-C(mg/dl)            | 54.4(11.2)           | 45.4(8.9)    | <0.001  | 54.2(11.3)              | 46.3(9.5)    | <0.001  | 55.3(11.8)          | 46.3(10.5)   | <0.001  |
| LDL-C(mg/dl)            | 120.6(31.1)          | 131.9(33.9)  | <0.001  | 125.8(30.9)             | 128.7(34.0)  | <0.001  | 120.2(31.3)         | 122.0(32.0)  | <0.001  |
| BMI(Kg/m <sup>2</sup> ) | 23.7(2.9)            | 28.2(3.7)    | <0.001  | 23.7(2.5)               | 27.0(3.2)    | <0.001  | 23.8(2.8)           | 26.6(3.3)    | <0.001  |

**Table 6** Chi-square test results of categorical variables for characteristics as well as MetS criteria variables

| Variables  | Item                          | Non-MetS |         | MetS  |         | p-value |
|------------|-------------------------------|----------|---------|-------|---------|---------|
|            |                               | No.      | (%)     | No.   | (%)     |         |
| Age        | Age≤40                        | 16,483   | (76.99) | 4,927 | (23.01) | <0.001  |
|            | 40<Age≤60                     | 13,813   | (67.17) | 6,752 | (32.83) | <0.001  |
|            | Age>60                        | 1,158    | (64.08) | 649   | (35.92) | <0.001  |
| Occupation | Professional-1                | 1,936    | (74.18) | 674   | (25.82) | <0.001  |
|            | Technical-2                   | 12,603   | (74.5)  | 4,314 | (25.5)  | <0.001  |
|            | Managerial-3                  | 5,704    | (67.48) | 2,749 | (32.52) | <0.001  |
|            | Sales-4                       | 4,516    | (70.47) | 1,892 | (29.53) | <0.001  |
|            | Service-5                     | 1,557    | (71.32) | 626   | (28.68) | <0.001  |
|            | Clerical and Administrative-6 | 1,558    | (73.94) | 549   | (26.06) | <0.001  |
|            | Manual Labor-7                | 2,127    | (72.79) | 795   | (27.21) | <0.001  |
|            | Taxi Driver-8                 | 1,453    | (66.59) | 729   | (33.41) | <0.001  |

with MetS becoming more likely with age. As for the three occupational groups that the eight occupational categories fell under, those in group-II (i.e., non-sedentary) occupations were less likely to develop MetS (OR = 0.89, CI: 0.82-0.97,  $p = 0.0107$ ) compared with the two other groups.

## DISCUSSION

Owen et al. [24] reported that the average person spends (1) 71% of their daily waking hours in a sedentary state and (2) only 30 min daily on moderate intensity physical activity on most days of a week. As noted in the literature review in the introduction section, MetS likelihood significantly increases with sedentary time and sedentary behavior [24, 39, 40]. Being sedentary also makes one significantly more likely to be obese [9], have poor cardiometabolic health [17, 32], and have poor cognitive health [26]. An increasing number of researchers are beginning to investigate the correlation of a sedentary occupation with MetS or CVD risk [9, 25, 26, 27, 29, 30].

However, most studies on MetS risk factors have focused on lack of physical activity rather than sedentary occupation. These studies have noted that in adults, spending more time being sedentary increases metabolic risk [41, 42]. Recent research has also demonstrated that lifestyle and SES are significant risk factors for MetS [21, 22] and CVD [21, 43, 44]. Nonetheless, Kim et al. [45] argued that a causal relationship of SES with MetS and CVD risks—as indicated by the Framingham risk score—cannot be established by the current body of cross-sectional evidence. Furthermore, scholars have yet to investigate the role of occupation in MetS risk, with occupation further distinguished by sedentary status and SES associations. In particular, MetS risk is likely to differ between those working in typically sedentary white-collar occupations (such as doctors, professors, managers, and engineers) and those working in sedentary blue-collar occupations (such as administrative staff, service staff, and even taxi drivers).

The current results indicated that those working in general sedentary and high-SES-associated occupations are at a higher risk of MetS compared with non-sedentary occupations. We also confirmed the importance of age as a MetS risk factor (Table 6). In particular, we further stratified the cases into three age groups: 21,410 cases were in the younger age group ( $\leq 40$  years old), 20,565 cases were in the middle-aged group (40–60 years old), and 1,807 cases were in the older age group ( $> 60$  years old). Most cases were in the younger age group. Moreover, MetS prevalence was 23.01%, 32.83%, and 35.92% for the younger, middle-aged, and older age groups, respectively, and the middle-aged significantly higher than younger people. Regarding occupation, sedentary (group-I) occupa-

tions were more significantly associated with MetS related to non-sedentary (group-II) occupations (OR=0.89,  $p=0.0107$ ). Taxi drivers (33.41%), managers (32.52%) and service staff (29.53%) were the three occupational groups most likely to get MetS. This study compared three categories of occupation and focused on sedentary behavior and high SES. However three categories comparisons cannot reveal each effect of sedentary behavior and SES, it should be the limitation. In addition, the people belonged to high-SES may have better capability to cope with non-communication diseases compared with general sedentary occupations [36]. This reason might causes the odds ratio of sedentary and high-SES group is not significant compared with general sedentary group.

## CONCLUSIONS

Although prolonged sitting is an ostensibly novel risk factor for health outcomes across all ages, its association must be replicated in occupational conditions [32]. In this study, we noted that age and occupation categories were risk factors for MetS, although a sedentary occupation has been known to be unhealthy. The study found that taxi drivers were indeed a high-risk group. However, high-SES-associated but sedentary occupations, such as a lawyer, teacher, accountant, doctor, nurse, engineer, and manager, were also high-risk groups for MetS. A study in South Korea's Gwangju city noted bus drivers to be a high-risk group for MetS and CV [30], but without specifically analyzing the occupational categories in the communities that taxi drivers were living in. In the current study, taxi driving, among eight occupational categories, had the highest MetS prevalence. However, after the eight categories were grouped into three groups, general sedentary occupations (group-I), of which taxi driving falls under, had a lower MetS prevalence than did sedentary and high-SES (group-III) occupations. This means that in general, high-SES and sedentary workers has a little-bit more risk than the general sedentary counterparts. Nevertheless, those in non-sedentary (group-II) occupations (e.g., sales and manual labor) had a lower risk of MetS compared with their sedentary counterparts. We recommend for government authorities to focus on taxi drivers, sedentary blue-collar workers, and sedentary high-SES workers in their policies, particularly in tailoring health promotion programs to these groups, such as aerobic exercise [46] or physical activities [28, 47]

## ACKNOWLEDGEMENTS

We thank the Ministry of Science and Technology for supporting this research (grant numbers: MOST-107-2221-E-161-002 and MOST-108-2221-E-161-003-MY2). We also thank the

**Table 7** Multiple logistic regression results for risk-factor associations

| Variables                | Condition     | OR   | 95%CI     | p-value |
|--------------------------|---------------|------|-----------|---------|
| Age                      | Age ≤ 40      | 1.00 |           |         |
|                          | 40 < Age ≤ 60 | 2.32 | 2.20 2.46 | <0.001  |
|                          | Age > 60      | 3.65 | 3.22 4.14 | <0.001  |
| Occupation               | Group-I*      | 1.00 |           |         |
|                          | Group-II†     | 0.89 | 0.82 0.97 | 0.0107  |
|                          | Group-III‡    | 1.02 | 0.96 1.09 | 0.523   |
| Weight(Kg)               |               | 1.03 | 1.03 1.04 | <0.001  |
| BMI                      |               | 1.28 | 1.26 1.31 | <0.001  |
| Body Fat Percentage(%)   |               | 1.08 | 1.07 1.08 | <0.001  |
| HDL-C(mg/dl)             |               | 0.99 | 0.99 1.00 | <0.001  |
| Total Cholesterol(mg/dl) |               | 1.01 | 1.01 1.01 | <0.001  |

\*Group-I: General sedentary-related occupations

†Group-II: non sedentary-related occupations ‡Group-

III: sedentary-related occupations with high-SES

Far Eastern Memorial Hospital for their support (grant number: NSC-RD-106-1-12-504). The authors would like to express their thanks for the aid rendered by Dr. Yen-Ling Chiu (Nephrologist) and Dr. Yen-Wen Wu (Cardiologist) of Far Eastern Memorial Hospital.

## FOOTNOTES

### Contributors

M.-S.C. (Ming-Shu Chen) conceived and designed the experiments; M.-S.C. and C.-H.C. (Chi-Hao Chiu) performed the experiments; C.-H.C., and S.-H.C. (Shih-Hsin Chen) analyzed the data; M.-S.C. were supervised the study; M.-S.C. contributed investigation material; M.-S.C., C.-H.C., and S.-H.C. wrote this paper together. S.-H.C. submitted this paper.

### Funding

This research was funded by a grant from the Ministry of Science and Technology in Taiwan (grant numbers: MOST-107-2221-E-161-002 & MOST-108-2221-E-161-003-MY2), and a funding from Far Eastern Memorial Hospital (ID: NSC-RD-106-1-12-504). The authors declare no conflict of interest. The founding sponsors had no role in the design of the study; in the collection, analyses, or interpretation of data; in the writing of the manuscript; or in the decision to publish the results.

## COMPETING INTERESTS

The authors declare no conflicts of interest concerning this study.

## Ethics approval

Ethical approval was obtained from the Research Ethics Review Committee at the Far Eastern Memorial Hospital in New Taipei City, Taiwan (Institutional Review Board approval number: FEMH-IRB-107126-E, v.02; board meeting and approval date: September 10, 2018). The MJ Health Research Foundation also approved this study. This study also has a PPS receipt (ClinicalTrials.gov ID: NCT04142593, Date: October 25, 2019)

## Data sharing statement

The first dataset was restricted by the Research Ethics Review Committee of the Far Eastern Memorial Hospital (FEMH-IRB-107126-E, v.02) in order to protect participant privacy. The second dataset, MJPD, is accessible to researchers upon request. Please contact Dr. Ming-Shu Chen (email: tree1013@gmail.com) to obtain further information.

## Consent to patient and public involvement statement

No patient involved.

## REFERENCES

- 1 R Bethene Ervin. Prevalence of metabolic syndrome among adults 20 years of age and over, by sex, age, race and ethnicity, and body mass index: United states. *National health statistics reports*, 13:1–8, 2009.
- 2 Lee-Ching Hwang, Chyi-Huey Bai, and Chien-Jen Chen. Prevalence of obesity and metabolic syndrome in tai-

- 1  
2  
3 wan. *Journal of the Formosan Medical Association*,  
4 105(8):626–635, 2006.
- 5  
6 3 Apilak Worachartcheewan, Chanin Nantasenamat,  
7 Chartchalerm Isarankura-Na-Ayudhya, Phannee Pidetcha,  
8 and Virapong Prachayasittikul. Identification of metabolic  
9 syndrome using decision tree analysis. *Diabetes Research  
10 and Clinical Practice*, 90(1):e15–e18, 2010.
- 11  
12 4 Yuan Ching, Yit Chin, Mahenderan Appukutty, Wan Gan,  
13 Vasudevan Ramachandran, and Yoke Chan. Prevalence of  
14 metabolic syndrome and its associated factors among veg-  
15 etarians in malaysia. *International journal of environmen-  
16 tal research and public health*, 15(9):2031, 2018.
- 17  
18 5 SuJin Song, Hee Young Paik, Won O Song, and YoonJu  
19 Song. Metabolic syndrome risk factors are associated  
20 with white rice intake in korean adolescent girls and boys.  
21 *British Journal of Nutrition*, 113(3):479–487, 2015.
- 22  
23 6 Hideo Matsuura, Kanae Mure, Nobuhiro Nishio, Naomi  
24 Kitano, Naoko Nagai, and Tatsuya Takeshita. Relationship  
25 between coffee consumption and prevalence of metabolic  
26 syndrome among japanese civil servants. *Journal of epi-  
27 demiology*, 22(2):160–166, 2012.
- 28  
29 7 Ming-Shu Chen and Shih-Hsin Chen. A data-driven as-  
30 sessment of the metabolic syndrome criteria for adult  
31 health management in taiwan. *International journal of en-  
32 vironmental research and public health*, 16(1):92, 2019.
- 33  
34 8 Xinghua Yang, Qiushan Tao, Feng Sun, and Siyan Zhan.  
35 The impact of socioeconomic status on the incidence of  
36 metabolic syndrome in a taiwanese health screening popu-  
37 lation. *International Journal of Public Health*, 57(3):551–  
38 559, 2012.
- 39  
40 9 Markus Strauß, Peter Foshag, Bianca Przybylek, Marc  
41 Horlitz, Alejandro Lucia, Fabian Sanchis-Gomar, and Ro-  
42 man Leischik. Occupation and metabolic syndrome: is  
43 there correlation? a cross sectional study in different  
44 work activity occupations of german firefighters and of-  
45 fice workers. *Diabetology & metabolic syndrome*, 8(1):57,  
46 2016.
- 47  
48 10 Enzo Bonora, Stefan Kiechl, Johann Willeit, Friedrich  
49 Oberhollenzer, Georg Egger, Riccardo C Bonadonna, and  
50 Michele Muggeo. Carotid atherosclerosis and coronary  
51 heart disease in the metabolic syndrome: prospective data  
52 from the bruneck study. *Diabetes care*, 26(4):1251–1257,  
53 2003.
- 54  
55 11 Joseph Henson, David W Dunstan, Melanie J Davies, and  
56 Thomas Yates. Sedentary behaviour as a new behavioural  
57 target in the prevention and treatment of type 2 diabetes.  
58 *Diabetes/metabolism research and reviews*, 32(S1):213–  
59 220, 2016.
- 60 12 Robert L Hanson, Giuseppina Imperatore, Peter H Ben-  
net, and William C Knowler. Components of the  
“metabolic syndrome” and incidence of type 2 diabetes.  
*Diabetes*, 51(10):3120–3127, 2002.
- 13 Peter WF Wilson, Ralph B D’Agostino, Helen Parise, Lisa  
Sullivan, and James B Meigs. Metabolic syndrome as a  
precursor of cardiovascular disease and type 2 diabetes  
mellitus. *Circulation*, 112(20):3066–3072, 2005.
- 14 BO Isomaa, Peter Almgren, Tiinamaija Tuomi, Björn  
Forsén, Kaj Lahti, Michael Nissén, Marja-Riitta Taskinen,  
and Leif Groop. Cardiovascular morbidity and mortality  
associated with the metabolic syndrome. *Diabetes care*,  
24(4):683–689, 2001.
- 15 Ann Marie McNeill, Ronit Katz, Cynthia J Girman,  
Wayne D Rosamond, Lynne E Wagenknecht, Joshua I  
Barzilay, Russell P Tracy, Peter J Savage, and Sharon A  
Jackson. Metabolic syndrome and cardiovascular disease  
in older people: the cardiovascular health study. *Journal of  
the American Geriatrics Society*, 54(9):1317–1324, 2006.
- 16 MusaSaulawaIbrahim, DongPang, GurchRandhawa, and  
Yannis Pappas. Risk models and scores for metabolic  
syndrome: systematic review protocol. *BMJ open*,  
9(9):e027326, 2019.
- 17 Kishan Bakrania, Charlotte L Edwardson, Danielle H  
Bodicoat, Dale W Esliger, Jason MR Gill, Aadil Kazi,  
Latha Velayudhan, Alan J Sinclair, Naveed Sattar, Stu-  
art JH Biddle, et al. Associations of mutually exclusive  
categories of physical activity and sedentary time with  
markers of cardiometabolic health in english adults: a  
cross-sectional analysis of the health survey for england.  
*BMC public health*, 16(1):25, 2016.
- 18 Salvatore Carbone, Danielle L Kirkman, Ryan S Garten,  
Paula Rodriguez-Miguel, Enrique G Artero, Duck-chul  
Lee, and Carl J Lavie. Muscular strength and cardiovas-  
cular disease: an updated state-of-the-art narrative review.  
*Journal of Cardiopulmonary Rehabilitation and Preven-  
tion*, 40(5):302–309, 2020.
- 19 Jason Brocato, Fen Wu, Yu Chen, Magdy Shamy, Man-  
sour A Alghamdi, Mamdouh I Khoder, Alser A Alkha-  
tim, Mamdouh H Abdou, and Max Costa. Association be-  
tween sleeping hours and cardiometabolic risk factors for  
metabolic syndrome in a saudi arabian population. *BMJ  
open*, 5(11), 2015.

- 1  
2  
3  
4  
5  
6  
7  
8  
9  
10  
11  
12  
13  
14  
15  
16  
17  
18  
19  
20  
21  
22  
23  
24  
25  
26  
27  
28  
29  
30  
31  
32  
33  
34  
35  
36  
37  
38  
39  
40  
41  
42  
43  
44  
45  
46  
47  
48  
49  
50  
51  
52  
53  
54  
55  
56  
57  
58  
59  
60
- 20 Jui Hua Huang, Ren Hau Li, Shu Ling Huang, Hon Ke Sia, Yu Ling Chen, and Feng Cheng Tang. Lifestyle factors and metabolic syndrome among workers: The role of interactions between smoking and alcohol to nutrition and exercise. *International Journal of Environmental Research Public Health*, 12(12):15967–15978, 2015.
- 21 Chen-Mao Liao and Chih-Ming Lin. Life course effects of socioeconomic and lifestyle factors on metabolic syndrome and 10-year risk of cardiovascular disease: A longitudinal study in taiwan adults. *International Journal of Environmental Research and Public Health*, 15(10):2178, 2018.
- 22 R Mehrdad, G Pouryaghoub, and M Moradi. Association between metabolic syndrome and job rank. *Int J Occup Environ Med*, 9(1):45–51, 2018.
- 23 Andrea Bankoski, Tamara B Harris, James J McClain, Robert J Brychta, Paolo Caserotti, Kong Y Chen, David Berrigan, Richard P Troiano, and Annemarie Koster. Sedentary activity associated with metabolic syndrome independent of physical activity. *Diabetes care*, 34(2):497–503, 2011.
- 24 Neville Owen, Geneviève N Healy, Charles E Matthews, and David W Dunstan. Too much sitting: the population-health science of sedentary behavior. *Exercise and sport sciences reviews*, 38(3):105, 2010.
- 25 Maria Aguilar, Taft Bhuket, Sharon Torres, Benny Liu, and Robert J Wong. Prevalence of the metabolic syndrome in the united states, 2003-2012. *Jama*, 313(19):1973–1974, 2015.
- 26 Kishan Bakrania, Charlotte L Edwardson, Kamlesh Khunti, Stephan Bandelow, Melanie J Davies, and Thomas Yates. Associations between sedentary behaviours and cognitive function: cross-sectional and prospective findings from the uk biobank. *American Journal of Epidemiology*, 2017.
- 27 Duk Cho and Jung-Wan Koo. Differences in metabolic syndrome prevalence by employment type and sex. *International journal of environmental research and public health*, 15(9):1798, 2018.
- 28 Carl J Lavie, Cemal Ozemek, Salvatore Carbone, Peter T Katzmarzyk, and Steven N Blair. Sedentary behavior, exercise, and cardiovascular health. *Circulation research*, 124(5):799–815, 2019.
- 29 Asuka Sakuraya, Kazuhiro Watanabe, Norito Kawakami, Kotaro Imamura, Emiko Ando, Yumi Asai, Hisashi Eguchi, Yuka Kobayashi, Norimitsu Nishida, Hideaki Arima, et al. Work-related psychosocial factors and onset of metabolic syndrome among workers: a systematic review and meta-analysis protocol. *BMJ open*, 7(6):e016716, 2017.
- 30 Seung Yong Shin, Chul Gab Lee, Han Soo Song, Sul Ha Kim, Hyun Seung Lee, Min Soo Jung, and Sang Kon Yoo. Cardiovascular disease risk of bus drivers in a city of korea. *Annals of occupational and environmental medicine*, 25(1):34, 2013.
- 31 Roman Leischik, Peter Foshag, Markus Strauß, Henning Littwitz, Pankaj Garg, Birgit Dworrak, and Marc Horlitz. Aerobic capacity, physical activity and metabolic risk factors in firefighters compared with police officers and sedentary clerks. *PloS one*, 10(7):e0133113, 2015.
- 32 Chutima Jalayondeja, Wattana Jalayondeja, Keerin Mekhora, Petcharatana Bhuanantanondh, Asadang Dusadi-Isariyavong, and Rujiret Upiriyasakul. Break in sedentary behavior reduces the risk of noncommunicable diseases and cardiometabolic risk factors among workers in a petroleum company. *International journal of environmental research and public health*, 14(5):501, 2017.
- 33 Markus Strauss, Peter Foshag, and Roman Leischik. Prospective evaluation of cardiovascular, cardiorespiratory, and metabolic risk of german office workers in comparison to international data. *International journal of environmental research and public health*, 17(5):1590, 2020.
- 34 Mohamed Hamad Al-Thani, Sohaila Cheema, Javaid Sheikh, Ravinder Mamtani, Albert B Lowenfels, Walaa Fattah Al-Chetachi, Badria Ali Almalki, Shamseldin Ali Hassan Khalifa, Ahmad Omar Haj Bakri, Patrick Maisonneuve, et al. Prevalence and determinants of metabolic syndrome in qatar: results from a national health survey. *BMJ open*, 6(9), 2016.
- 35 Anne Kouvonen, Mika Kivimäki, Marko Elovainio, Jaana Pentti, Anne Linna, Marianna Virtanen, and Jussi Vahtera. Effort/reward imbalance and sedentary lifestyle: an observational study in a large occupational cohort. *Occupational and environmental medicine*, 63(6):422–427, 2006.
- 36 R Leischik, B Dworrak, M Strauss, B Przybyłek, D Schöne, M Horlitz, A Mügge, and T Dworrak. Plasticity of health. *German Journal of Medicine*, 1:1–17, 2016.
- 37 Pamela S Cain and Donald J Treiman. The dictionary of occupational titles as a source of occupational data. *American Sociological Review*, pages 253–278, 1981.

- 38 Proper K. I. Hildebrandt V. H. Jans, M. P. Sedentary behavior in dutch workers: differences between occupations and business sectors. *American journal of preventive medicine*, 33(6):450–454, 2007.
- 39 Earl S Ford, Harold W Kohl, Ali H Mokdad, and Umed A Ajani. Sedentary behavior, physical activity, and the metabolic syndrome among us adults. *Obesity*, 13(3):608–614, 2005.
- 40 Katrien Wijndaele, N Duvigneaud, Lynn Matton, William Duquet, Christophe Delecluse, Martine Thomis, Gaston Beunen, Johan Lefevre, and RM Philippaerts. Sedentary behaviour, physical activity and a continuous metabolic syndromeriskscoreinadults. *Europeanjournalofclinical nutrition*, 63(3):421, 2009.
- 41 Genevieve N Healy, Katrien Wijndaele, David W Dunstan, Jonathan E Shaw, Jo Salmon, Paul Z Zimmet, and Neville Owen. Objectively measured sedentary time, physical activity, and metabolic risk. *Diabetes care*, 31(2):369–371, 2008.
- 42 RJ Shephard. Breaks in sedentary time: Beneficial associations with metabolic risk healy gn, dunstan dw, salmon j, et al (the univ of queensland, brisbane, australia; the international diabetes inst, melbourne, australia; deakin univ, melbourne, australia; et al) diabetes care 31: 661-666, 2008. *Year Book of Sports Medicine*, 2010:183–185, 2010.
- 43 Eric B Loucks, David H Rehkopf, Rebecca C Thurston, and Ichiro Kawachi. Socioeconomic disparities in metabolic syndrome differ by gender: evidence from nhanes iii. *Annals of epidemiology*, 17(1):19–26, 2007.
- 44 Sunmi Yoo, Hong-Jun Cho, and Young-Ho Khang. General and abdominal obesity in south korea, 1998–2007: gender and socioeconomic differences. *Preventive medicine*, 51(6):460–465, 2010.
- 45 Ji Young Kim, Sung Hi Kim, and Yoon Jeong Cho. Socioeconomic status in association with metabolic syndrome and coronary heart disease risk. *Korean journal of family medicine*, 34(2):131, 2013.
- 46 Esmée A Bakker, Duck-chul Lee, Xuemei Sui, Enrique G Artero, Jonatan R Ruiz, Thijs MH Eijsvogels, Carl J Lavie, and Steven N Blair. Association of resistance exercise, independent of and combined with aerobic exercise, with the incidence of metabolic syndrome. In *Mayo Clinic Proceedings*, volume 92, pages 1214–1222. Elsevier, 2017.
- 47 Gerald F Fletcher, Carolyn Landolfo, Josef Niebauer, Cernal Ozemek, Ross Arena, and Carl J Lavie. Promoting physical activity and exercise: Jacc health promotion series. *Journal of the American College of Cardiology*, 72(14):1622–1639, 2018.

## IRB CERTIFICATE

### 亞東紀念醫院人體試驗審議委員會

Research Ethics Review Committee  
Far Eastern Memorial Hospital  
21, Sec. 2, Nanya S. Rd., Banciao Dist., New Taipei City 220, Taiwan (R.O.C.)  
Tel : (02)7728-2152 Fax : (02)7728-1592  
Email : irb@mail.femh.org.tw

### 人體試驗/研究許可書

西元二〇一八年九月十日

案件編號: 107126-E  
計畫名稱: 應用決策分析技術於巨量檢査資料庫以探討新陳代謝症候群之高危險族群  
計畫主持人: 陳紹樹  
共/協同主持人: 吳彥雯  
研究成員: 邱琦皓、吳冠琴、楊雅如、葉欣  
計畫書版本: Version6, 20180829, FEMH-107126-E  
受試者說明及同意書版本: 免除受試者說明及同意書  
中文摘要: Version2,20180830, FEMH-107126-E  
英文摘要: Version1,20180620, FEMH-107126-E  
試驗期間: 2018年9月10日至2021年9月1日  
試驗人數: 100000 (亞東: 2000)  
追蹤審查頻率: 一年

上述計畫已於本院人體試驗審議委員會審查, 同意人體試驗/研究進行。有效期限自二〇一八年九月十日至二〇一九年九月十日。(依照 ICH-GCP 規定, 臨床試驗每屆滿一年, 人體試驗委員會必須重新審查是否繼續進行。請於有效期限到期二個月前繳交持續審查報告以利本會進行審查)

主任委員 張淑雯

Permission of Clinical Trial  
Far Eastern Memorial Hospital

Date: September 10, 2018

FEMH No.: 107126-E  
Protocol Title: Application of decision analysis techniques' in huge health-checkup database to explore the high-risk group with metabolic syndrome (MetS)  
Principal investigator: Ming-Shu Chen  
Co- investigator: Yen-Wen Wu  
Research Associate: Chi-Hao Chiu, Guan-Ting Wu, Ya-Ru Yang, Xin Ye  
Protocol Version: Version6, 20180829, FEMH-107126-E  
Informed Consent Form: Waiver  
Chinese Synopsis: Version2,20180830, FEMH-107126-E  
English Synopsis: Version1,20180620, FEMH-107126-E  
Trial period: September 10, 2018 to September 1, 2021  
Number of subjects: 100000 (FEMH: 2000)  
Continuing review frequency: One year

Above study has been approved by the Research Ethics Review Committee of the Far Eastern Memorial Hospital and valid since September 10, 2018 to September 10, 2019. The Committee is organized and operates according to Good Clinical Practice and the applicable laws and regulations. Apply for a continuing review not less than two months prior to approval expiration date.  
Shu-Wen Chang M.D., Professor of Ophthalmology  
Chairman  
Research Ethics Review Committee

P10003-02-002-06 2017-10-23

1  
2  
3  
4  
5  
6  
7  
8  
9  
10  
11  
12  
13  
14  
15  
16  
17  
18  
19  
20  
21  
22  
23  
24  
25  
26  
27  
28  
29  
30  
31  
32  
33  
34  
35  
36  
37  
38  
39  
40  
41  
42  
43  
44  
45  
46  
47  
48  
49  
50  
51  
52  
53  
54  
55  
56  
57  
58  
59  
60

For peer review only

# BMJ Open

## Risk assessment of metabolic syndrome prevalence involving sedentary occupations and socioeconomic status

|                                 |                                                                                                                                                                                                                                                                  |
|---------------------------------|------------------------------------------------------------------------------------------------------------------------------------------------------------------------------------------------------------------------------------------------------------------|
| Journal:                        | <i>BMJ Open</i>                                                                                                                                                                                                                                                  |
| Manuscript ID                   | bmjopen-2020-042802.R2                                                                                                                                                                                                                                           |
| Article Type:                   | Original research                                                                                                                                                                                                                                                |
| Date Submitted by the Author:   | 13-May-2021                                                                                                                                                                                                                                                      |
| Complete List of Authors:       | Chen, Ming-Shu; Oriental Institute of Technology, Department of Health Care Administration<br>Chiu, Chi-Hao; Far Eastern Memorial Hospital, Department of Medical Affairs<br>Chen, Shih-Hsin; Cheng Shiu University, Information Management                      |
| <b>Primary Subject Heading</b>: | Occupational and environmental medicine                                                                                                                                                                                                                          |
| Secondary Subject Heading:      | Health informatics                                                                                                                                                                                                                                               |
| Keywords:                       | Other metabolic, e.g. iron, porphyria < DIABETES & ENDOCRINOLOGY, Health policy < HEALTH SERVICES ADMINISTRATION & MANAGEMENT, Risk management < HEALTH SERVICES ADMINISTRATION & MANAGEMENT, PUBLIC HEALTH, Health informatics < BIOTECHNOLOGY & BIOINFORMATICS |
|                                 |                                                                                                                                                                                                                                                                  |

SCHOLARONE™  
Manuscripts



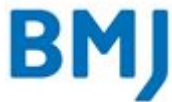

I, the Submitting Author has the right to grant and does grant on behalf of all authors of the Work (as defined in the below author licence), an exclusive licence and/or a non-exclusive licence for contributions from authors who are: i) UK Crown employees; ii) where BMJ has agreed a CC-BY licence shall apply, and/or iii) in accordance with the terms applicable for US Federal Government officers or employees acting as part of their official duties; on a worldwide, perpetual, irrevocable, royalty-free basis to BMJ Publishing Group Ltd ("BMJ") its licensees and where the relevant Journal is co-owned by BMJ to the co-owners of the Journal, to publish the Work in this journal and any other BMJ products and to exploit all rights, as set out in our [licence](#).

The Submitting Author accepts and understands that any supply made under these terms is made by BMJ to the Submitting Author unless you are acting as an employee on behalf of your employer or a postgraduate student of an affiliated institution which is paying any applicable article publishing charge ("APC") for Open Access articles. Where the Submitting Author wishes to make the Work available on an Open Access basis (and intends to pay the relevant APC), the terms of reuse of such Open Access shall be governed by a Creative Commons licence – details of these licences and which [Creative Commons](#) licence will apply to this Work are set out in our licence referred to above.

Other than as permitted in any relevant BMJ Author's Self Archiving Policies, I confirm this Work has not been accepted for publication elsewhere, is not being considered for publication elsewhere and does not duplicate material already published. I confirm all authors consent to publication of this Work and authorise the granting of this licence.

# Risk assessment of metabolic syndrome prevalence involving sedentary occupations and socioeconomic status

Ming-Shu Chena, Chi-Hao Chiub, and Shih-Hsin Chen\*<sup>c</sup>

<sup>a</sup>Department of Healthcare Administration, Oriental Institute of Technology, No.58, Sec. 2, Sichuan Rd., Pan-Chiao Dist., New Taipei City 22061, Taiwan (R.O.C.)

<sup>b</sup>Department of Medical Affairs, Far Eastern Memorial Hospital, No.21, Sec. 2, Nanya S. Rd., Banqiao Dist., New Taipei City 22061, Taiwan (R.O.C.)

<sup>c</sup>Department of Information Management, Cheng Shiu University, No.840, Chengcing Rd., Niasong Dist., Kaohsiung City 83347, Taiwan (R.O.C.)

## ABSTRACT

**Objectives:** To determine the association between metabolic syndrome (MetS) prevalence and occupation—distinguished by being sedentary and non-sedentary and by socioeconomic status (SES). Eight occupation categories are extensively considered. Numerous occupations, lawyers, teachers, engineers, senior section chiefs of enterprises, taxi driving, and so on are considered.

**Methods:** We analyzed two data sets with 73,506 cases. MetS was identified according to the criteria of the modified Adult Treatment Panel III. A multiple logistic regression algorithm was used to test factors for three age segments. We employed R for Windows (version 3.5.1) for all statistical analyses.

**Results:** MetS prevalence rate is increasing according to the age growth. Furthermore, When the age is above 60, MetS was significantly more likely for sedentary high-SES occupations (OR = 1.39,  $p < 0.0247$ ) than those working in general sedentary occupations associated with no particular SES and non-sedentary job.

**Conclusions:** Because high-SES and sedentary occupations in the age above 60 increased the MetS risk, we suggest for the authorities to focus them, specif

**Keywords:** Sedentary occupation, Metabolic Syndrome, Risk assessment, Regression Model

### Strengths and limitations of this study

- We might be the first one to evaluate sedentary/non-sedentary occupations and by SES extensively.
- Two data sets with 73,506 cases were employed.
- Three occupation groups include general sedentary-related, non-sedentary related, and sedentary-related with high-SES.
- Chi-square test are used to evaluate the categorical factors of in three age groups and occupations, and multiple logistic regression tests the risk-factor associations
- The main limitations of this study is that the data was only collected in Taiwan, which might be not the same for other countries.

## INTRODUCTION

MetS has been established as a public health concern in Western countries and is an increasingly severe public health problem in numerous countries. In the United States, 34% of adults satisfy the MetS criteria, which was formulated in the National Cholesterol Education Program Adult Treatment Panel (NCEP ATP III); in particular, US adults aged more than 60 years are more prone to having MetS [1]. The health status of the Taiwanese population was estimated in 2002 using the data of 7566 participants in a nationwide cross-sectional population-based survey, named the Taiwanese Survey on

Corresponding author: shchen@csu.edu.tw

Prevalence of Hyperglycemia, Hyperlipidemia, and Hypertension (TwSHHH). Hwang et al. [2] reported that the prevalence of MetS in women increases rapidly after the menopausal period to become higher than that in men; they also noted MetS' high correlations with age as well as overweight and obesity. In other Asian countries, MetS is also an important health issue, and studies on MetS have been conducted in Thailand [3], Malaysia [4], South Korea [5], and Japan [6] in addition to studies in Taiwan [2, 7, 8].

MetS is highly correlated with overweight and obesity [2, 9], and it comprises a constellation of interrelated metabolic disorders—including hypertension [10], type 2 diabetes mellitus (T2DM) [11, 12, 13], cardiovascular disease (CVD) [13, 14], and stroke [15]. In addition, people with MetS have five-fold diabetes [16]. The scholarly evidence has also preponderantly indicated that individuals with MetS or a sedentary occupation had increased the incidence of T2DM and coronary heart disease, as well as increased mortality due to CVD [11, 12, 13, 14, 17]. The other study also pointed out the reduced muscular strength is also associated with increased CVD and CVD-related mortality [18].

As a result, the reasons causing MetS must be investigated. The risk factors for MetS include aging, sedentary, long working hours, physical inactivity, Western diet, sleep duration greater than 7 hours [19], and high occupational stress [20]. Socioeconomic status (SES) and lifestyle are the possible risk factors for MetS [21, 22]. Of these factors, prolonged sitting is an apparent risk factor for negative health outcomes across all ages due to the rapid automation of the workplace [23, 24]. More recent studies have begun discussing the correlation of sedentary occupation with MetS or CVD risk [9, 25, 26, 27, 28, 29, 30].

Bakrania et al. [26] demonstrated that sedentary behavior affects not only physical but also cognitive health. Leischik et al. [31] compared the 97 firefighters, 55 police officers, and 46 sedentary office workers in German. Sedentary occupations show to be associated with obesity and metabolic syndrome in middle-aged men. The other study on workers in a petroleum company reported that sedentary behavior—specifically for ten h/day with two-thirds of those ten h spent sitting at work—was significantly associated with cardiometabolic risk factors [32]. An individual having a sedentary occupation is substantially more likely to be obese. Strauß et al. [9] found that office workers had a significantly greater abdominal waist circumference (WC) than do firefighters and that 33% of sedentary German office workers had MetS. Later on, Strauß et al. [33] further evaluated the 10-year cardiovascular risk for 46 office workers in German by using the Framingham score. The office workers have a tendency cardiovascular risk and a higher rate of MetS.

However, its risk association must be replicated concerning the occupational condition or SES [22, 32, 34, 35]. SES is a combination of salary, social status, and education and can be evaluated by occupation or work status [36]. Al-Thani et al. [34] shown that no statistically significant association was founded for occupation. Mehrdad et al. [22] found the association between MetS and three job ranks in a company didn't cause a significant difference. Therefore, this study focused on MetS prevalence—and the related chronic disease biochemical test indexes—concerning occupation among adults in Taiwan. The current study focused on sedentary occupations and occupations associated with different SES conditions.

Finally, although numerous studies include some occupations or SES condition [22, 32, 34, 35], this research might be the first one to study those in sedentary or more high-SES-associated occupations, especially occupations that increase MetS risk, which hasn't explored yet by prior researches. There are eight major occupations and then allocated into three groups: general sedentary occupation, non-sedentary occupation, and sedentary occupations with high-SES. Our hypothesis includes a difference between the sedentary occupation and high-SES would cause higher MetS prevalence. The following section explains the methods used in this paper.

## METHODS

### Definition of a sedentary occupation and SES

According to the US Department of Labor's Dictionary of Occupational Titles, sedentary work is the occasional exertion of >10 lbs of force and/or a frequent exertion of a negligible amount of force. In this definition, "occasional" and "frequent" are defined as being present <1/3 and 1/3–2/3 of the time, respectively. Such force can be used to lift, carry, push, pull, or move objects—including the human body. Sedentary work involves sitting most of the time, but it may involve walking or standing for brief periods. Thus, a job was defined to be sedentary if walking and standing are required only occasionally, and all other sedentary criteria are met [37]. In this research, we select the taxi drivers, clerical, and administrative jobs as the representative belonged to the sedentary-related occupations in comparison with other non-sedentary-related, and sedentary-related high-SES jobs in the analysis to compare three categories of occupations. The rationale and hypothesis of this study are based on the previous studies to determine whether sedentary-related careers have a higher risk of developing MetS, and at the same time, compare the differences between high-SES and non-SES in sedentary

occupations.

We employed eight occupational categories: Professional-1, Technical-2, Managerial-3, Sales-4, Service-5, Clerical and Administrative-6, Manual Labor-7, and Taxi Driving-8. The detailed occupations of the Professional-1, Technical-2, and Managerial-3 categories are shown in Table 1. According to Jans et al. [38], there are differences in sitting time among occupational groups and business sectors in Dutch. We put the occupation categories into three groups: general sedentary-related (Group-I), non-sedentary (Group-II), and sedentary-related and high-SES (Group-III), based on occupational environment and social-economic status (SES) of occupations. The arrangement of the eight works is illustrated in Table 2.

### Definition of MetS

MetS was defined in this study according to guidelines from the Health Promotion Administration of Taiwan's Ministry of Health and Welfare. MetS prevalence was evaluated using the definitions of the modified ATP III and the MetS criteria for Taiwanese (MetS-TW). Five major factors were used to determine whether a person had MetS: WC, high blood pressure, fasting blood sugar (BS), triglyceride (TG) level, and HDL-C level. High blood pressure included the rates of systolic blood pressure (SBP) and diastolic blood pressure (DBP). Specifically, a Taiwanese person is defined as having MetS if they have three or more of the following five conditions in the ATP III: abdominal obesity, high TG, low HDL-C, hypertension, and hyperglycemia; the rules are detailed in Table 3.

### Data resource and data collection

We obtained two datasets from the New Taipei City Government Annual Taxi Health Examination Survey and MJ Health Check-Up-Based Population Database (MJPD). The duration of the first dataset covered the 2012–2016 period and was conducted by Far Eastern Memorial Hospital (FEMH)<sup>2</sup>. The second dataset MJPD was collected from four MJ clinics, which provide periodic health examinations to their members, which is accessible to researchers upon request<sup>3</sup>.

All of the data sets used in this study were authorized and given to this study's researchers by the MJPD Health Research Foundation with FEMH IRB approval. The laboratory data of the two databases were obtained from the same biochemical examination apparatus (Hitachi-7600). The two datasets conform to the ISO-15189 guidelines. Regarding ethical data

<sup>2</sup>FEMH is one of the only hospitals that mainly undertakes the annual health check-up of taxi drivers in New Taipei City, and it is also the hospital with the most significant number of services and the largest hospital in New Taipei City

<sup>3</sup><http://www.mjhrf.org/main/page/release1/en/release01>

use, the protocol of this study was approved by the Research Ethics Review Committee at FEMH (FEMH-IRB-107126-E and ) and the MJ Health Research Foundation.

### Data preprocessing

In the beginning, any personal information of all individuals was removed to protect their privacy from the two datasets. The MJPD database had 71,212 cases (41,600 male and 29,612 female) after we excluded the data entries with the occupational category "Others" and "missing values" for data analysis. The FEMH database had 2,294 cases of taxi drivers (2,182 male and 112 female). After combining the two databases, there are 73,506 records in total. MetS was identified based on the NCEP ATP III MetS criteria, and MetS prevalence was calculated.

Because age has been demonstrated to be an essential influence on MetS risk, we stratified the data into  $\leq 40$ , 40 to 60, and  $\geq 60$ -year-old groups. We focused on the effect on MetS risk from occupation—distinguished first by whether the field is sedentary versus or non-sedentary and second by the occupation's association with SES.

### Statistical analysis

This study's statistical analysis and graphs were performed using an R (v3.5.1) package for multiple logistic regression. A p-value of  $< 0.05$  indicated statistical significance between the two test populations. In the univariate analysis, a two-sample independent *t* test was adopted to analyze the difference in the mean value of continuous variables between participants with and without MetS. An exact chi-square test was used to define the differences between categorical variables. Multiple logistic regression was used to determine the effect of all influential variables.

## RESULTS

We analyzed the dataset by gender, height, weight, WC, blood pressure, TG level, HDL-C, SBP, DBP, and fasting BS. We computed the BMI from the height and weight data. In the next sub-sections, we present the descriptive statistics and the correlations among factors.

### Descriptive Statistics

Of these 73,506 cases, 57,932 did not have MetS and 15,574 had MetS. MetS prevalence in this study thus was 21.19%. We conducted comparisons for the various physiological parameters, such as weight, SBP, and DBP for males and females in

**Table 1** Detail Occupation groups in the Professional-1, Technical-2, and Managerial-3 categories

| Categories     | Occupations                                                                  |
|----------------|------------------------------------------------------------------------------|
| Professional-1 | Lawyers, teachers, accountants, and nurses                                   |
| Technical-2    | Engineers, architects, and programmers                                       |
| Managerial-3   | Senior executives of government departments or section chiefs of enterprises |

**Table 2** Sedentary versus non-sedentary occupation categories association with SES

| Group number | Type                           | Categories                                                  |
|--------------|--------------------------------|-------------------------------------------------------------|
| Group-I      | General sedentary-related      | Service-5, Clerical and Administrative-6, and Taxi Driver-8 |
| Group-II     | Non sedentary-related          | Sales-4, and Manual Labor-7                                 |
| Group-III    | Sedentary-related and high-SES | Professional-1, Technical-2, and Managerial-3               |

**Table 3** MetS criteria

| No. | Factors                                      | Abnormal Condition                       |
|-----|----------------------------------------------|------------------------------------------|
| 1   | Fasting Plasma Glucose (FPG)                 | FPG $\geq$ 100mg/dL                      |
| 2   | High Density Lipoprotein Cholesterol (HDL-C) | Male $<$ 40mg/dL or Female $<$ 50mg/dL   |
| 3   | High Blood Pressure                          | SBP $\geq$ 130mmHg or DBP $\geq$ 85mmHg  |
| 4   | Triglyceride (TG)                            | TG $\geq$ 150mg/dL                       |
| 5   | Waist Circumference (WC)                     | Male $\geq$ 90 cm or Female $\geq$ 80 cm |

Table 4 and Table 5, respectively. Compared with MetS, individuals without MetS were healthier: their weight, SBP, WC, TG level, and BMI were lower, and their HDL-C level was greater. All characteristics were significantly related to MetS ( $p < 0.001$ ).

We further stratified the cases into three age groups, including the younger age group ( $\leq 40$  years old), the middle-aged group (40–60 years old), and the older age group ( $> 60$  years old). Table 6 and Table 7 detail the age-stratified data of male and female, respectively. MetS prevalence of males was 23.01%, 32.83%, and 35.92% for the younger, middle-aged, and older age groups, respectively. The prevalence rates of the female are 6.23%, 15.68%, and 32.07% for the younger, middle-aged, and older age groups, respectively. The result is consistent with studies reporting that MetS becomes more likely with age [1, 15]. Furthermore, as noted in Table 6 and Table 7, most factors—such as weight, SBP, DBP, and WC—were significantly related ( $p < 0.001$ ) to MetS prevalence for all age groups, identical to the findings for the unstratified data in Table 4 and Table 5.

### Chi-square exact test and multiple logistic regression analysis

Because some variables for characteristics were categorical, we used a chi-square test to analyze the relationships among them for males and females in Table 8 and Table 9, respectively. We marked some important information in bold. Age and occupation were significantly associated with MetS ( $p < 0.001$ ). To explore the public perception of risk indicators of MetS, we further analyzed the eight aforementioned occupational categories. All occupation categories were significantly associated with MetS ( $p < 0.001$ ). Among the occupations, taxi driving had the highest MetS prevalence rate (e.g., 33.41% and 60.71% for male and female, respectively) even though the number of female taxi driving was only 44, which was much higher than the average prevalence rate (28.16% and 10.92% for male and female, respectively) in the unstratified data. The occupational categories with the second and the third highest MetS prevalence of males were Managerial-3 and Sales-4 at 32.52%, and 29.53%, respectively. On the other hand, the second and the third highest MetS prevalence of females were Manual Labor-7 and Managerial-3 at 18.97%, and 12.41%, respectively.

According to Table 8 and Table 9, the prevalence rates of both males and females were high when age is greater than or equal to 60; we focus on this age group. We analyzed the associations between major factors in a multiple logistic regression model in Table 10. BMI (%), body weight (kg), body

**Table 4** Comparison of MetS characteristics of male

| Variables               | Total |       | Without<br>(n=31,454) |      | With<br>(n=12,328) |       | p-value |
|-------------------------|-------|-------|-----------------------|------|--------------------|-------|---------|
|                         | Mean  | SD    | Mean                  | SD   | Mean               | SD    |         |
| Weight(Kg)              | 72.8  | 11.3  | 69.7                  | 9.3  | 80.9               | 12.1  | <0.001  |
| SBP(mmHg)               | 120.6 | 15.0  | 116.8                 | 13.0 | 130.3              | 15.4  | <0.001  |
| DBP(mmHg)               | 77.4  | 10.5  | 74.8                  | 9.2  | 84.0               | 10.6  | <0.001  |
| WC(cm)                  | 84.1  | 8.7   | 81.2                  | 7.0  | 91.5               | 8.3   | <0.001  |
| Body Fat (%)            | 24.3  | 5.5   | 22.8                  | 4.8  | 28.0               | 5.3   | <0.001  |
| FPG(mg/dl)              | 103.2 | 18.7  | 99.5                  | 12.6 | 112.6              | 26.8  | <0.001  |
| TG(mg/dl)               | 136.8 | 103.5 | 113.6                 | 74.7 | 196.0              | 137.7 | <0.001  |
| CHOL                    | 197.5 | 34.2  | 195.4                 | 33.1 | 202.8              | 36.1  | <0.001  |
| HDL-C(mg/dl)            | 52.0  | 11.4  | 54.3                  | 11.3 | 46.0               | 9.3   | <0.001  |
| LDL-C(mg/dl)            | 124.8 | 32.1  | 122.9                 | 31.1 | 129.6              | 33.9  | <0.001  |
| BMI(Kg/m <sup>2</sup> ) | 24.8  | 3.4   | 23.7                  | 2.7  | 27.4               | 3.5   | <0.001  |

**Table 5** Comparison of MetS characteristics of female

| Variables               | Total  |       | Without<br>(n=26,478) |       | With<br>(n=3,246) |       | p-value |
|-------------------------|--------|-------|-----------------------|-------|-------------------|-------|---------|
|                         | Mean   | SD    | Mean                  | SD    | Mean              | SD    |         |
| Weight(Kg)              | 55.78  | 9.35  | 54.32                 | 7.76  | 67.70             | 12.28 | <0.001  |
| SBP(mmHg)               | 107.49 | 14.89 | 105.48                | 13.15 | 123.88            | 17.81 | <0.001  |
| DBP(mmHg)               | 68.44  | 10.06 | 67.32                 | 9.22  | 77.65             | 11.76 | <0.001  |
| WC(cm)                  | 71.08  | 7.91  | 69.71                 | 6.49  | 82.22             | 9.52  | <0.001  |
| Body Fat (%)            | 29.03  | 6.75  | 27.97                 | 5.83  | 37.76             | 7.44  | <0.001  |
| FPG(mg/dl)              | 97.02  | 14.39 | 95.04                 | 9.38  | 113.20            | 29.78 | <0.001  |
| TG(mg/dl)               | 86.99  | 58.01 | 78.01                 | 43.40 | 160.16            | 97.19 | <0.001  |
| CHOL                    | 190.61 | 32.57 | 189.36                | 31.96 | 200.81            | 35.56 | <0.001  |
| HDL-C(mg/dl)            | 65.33  | 14.78 | 67.12                 | 14.21 | 50.80             | 10.78 | <0.001  |
| LDL-C(mg/dl)            | 109.23 | 29.83 | 107.12                | 28.84 | 126.33            | 32.18 | <0.001  |
| BMI(Kg/m <sup>2</sup> ) | 22.03  | 3.48  | 21.43                 | 2.83  | 26.93             | 4.31  | <0.001  |

**Table 6** Comparisons of MetS characteristics of male stratified by age

| Variables               | Age≤40<br>(n=21,410) |              |         | 40<Age≤60<br>(n=20,565) |              |         | Age>60<br>(n=1,807) |              |         |
|-------------------------|----------------------|--------------|---------|-------------------------|--------------|---------|---------------------|--------------|---------|
|                         | Non Mets             | Mets         | p-value | Non MetS                | MetS         | p-value | Non MetS            | MetS         | p-value |
| Weight(Kg)              | 70.8(9.7)            | 85.1(12.5)   | <0.001  | 68.7(8.5)               | 78.6(11.0)   | <0.001  | 64.9(8.5)           | 73.5(9.6)    | <0.001  |
| SBP(mmHg)               | 115.9(11.7)          | 128.9(14.7)  | <0.001  | 117.1(13.7)             | 130.5(15.6)  | <0.001  | 125.8(17.2)         | 139.2(16.2)  | <0.001  |
| DBP(mmHg)               | 73.4(8.6)            | 82.4(10.6)   | <0.001  | 76.1(9.5)               | 85.0(10.5)   | <0.001  | 77.8(10.5)          | 85.0(10.0)   | <0.001  |
| WC(cm)                  | 80.8(7.2)            | 92.6(8.6)    | <0.001  | 81.6(6.7)               | 90.6(8.1)    | <0.001  | 83.0(7.4)           | 91.5(8.0)    | <0.001  |
| Body Fat (%)            | 23.3(5.0)            | 29.6(5.3)    | <0.001  | 22.3(4.5)               | 27.0(5.0)    | <0.001  | 21.3(4.8)           | 25.8(5.4)    | <0.001  |
| FPG(mg/dl)              | 97.8(9.3)            | 108.5(22.8)  | <0.001  | 101.2(14.7)             | 114.6(27.7)  | <0.001  | 103.3(21.0)         | 122.0(37.6)  | <0.001  |
| TG(mg/dl)               | 109.1(74.0)          | 198.9(148.4) | <0.001  | 120.1(77.0)             | 196.0(132.2) | <0.001  | 101.1(47.2)         | 173.7(103.5) | <0.001  |
| CHOL                    | 192.1(32.8)          | 203.5(36.2)  | <0.001  | 199.6(33.0)             | 203.1(36.0)  | <0.001  | 192.0(34.0)         | 194.6(35.3)  | <0.001  |
| HDL-C(mg/dl)            | 54.4(11.2)           | 45.4(8.9)    | <0.001  | 54.2(11.3)              | 46.3(9.5)    | <0.001  | 55.3(11.8)          | 46.3(10.5)   | <0.001  |
| LDL-C(mg/dl)            | 120.6(31.1)          | 131.9(33.9)  | <0.001  | 125.8(30.9)             | 128.7(34.0)  | <0.001  | 120.2(31.3)         | 122.0(32.0)  | <0.001  |
| BMI(Kg/m <sup>2</sup> ) | 23.7(2.9)            | 28.2(3.7)    | <0.001  | 23.7(2.5)               | 27.0(3.2)    | <0.001  | 23.8(2.8)           | 26.6(3.3)    | <0.001  |

fat percentage (%) and total cholesterol (mg/dL) were revealed to be the important risk factors for MetS ( $p < 0.001$ ). As for the three occupational groups that the eight occupational cate-

gories fell under, those in group-III (i.e., sedentary-related occupations with high-SES) occupations were likely to develop MetS (OR = 1.39, CI: 1.04-1.85,  $p = 0.0247$ ) compared with

**Table 7** Comparisons of MetS characteristics of female stratified by age

| Variables               | Age≤40<br>(n=15,972) |        |         | 40<Age≤60<br>(n=13,172) |        |         | Age>60<br>(n=580) |        |         |
|-------------------------|----------------------|--------|---------|-------------------------|--------|---------|-------------------|--------|---------|
|                         | Non Mets             | Mets   | p-value | Non MetS                | MetS   | p-value | Non MetS          | MetS   | p-value |
| Weight(Kg)              | 54.06                | 72.86  | <0.001  | 54.69                   | 65.80  | <0.001  | 63.56             | 64.47  | <0.001  |
| SBP(mmHg)               | 103.10               | 120.02 | <0.001  | 108.20                  | 125.09 | <0.001  | 53.50             | 61.22  | <0.001  |
| DBP(mmHg)               | 66.30                | 76.32  | <0.001  | 68.54                   | 78.43  | <0.001  | 118.69            | 131.14 | <0.001  |
| WC(cm)                  | 68.78                | 84.36  | <0.001  | 70.85                   | 81.28  | <0.001  | 71.42             | 76.18  | <0.001  |
| Body Fat (%)            | 27.51                | 40.42  | <0.001  | 28.54                   | 36.70  | <0.001  | 73.05             | 81.20  | <0.001  |
| FPG(mg/dl)              | 93.45                | 109.35 | <0.001  | 96.89                   | 114.45 | <0.001  | 29.12             | 35.18  | <0.001  |
| TG(mg/dl)               | 73.05                | 149.66 | <0.001  | 84.23                   | 165.27 | <0.001  | 91.55             | 159.60 | <0.001  |
| CHOL                    | 183.75               | 192.51 | <0.001  | 196.28                  | 203.75 | <0.001  | 207.74            | 212.53 | 0.1437  |
| HDL-C(mg/dl)            | 67.05                | 49.48  | <0.001  | 67.18                   | 51.13  | <0.001  | 67.84             | 54.21  | <0.001  |
| LDL-C(mg/dl)            | 102.60               | 123.23 | <0.001  | 112.66                  | 127.47 | <0.001  | 121.36            | 129.99 | 0.0047  |
| BMI(Kg/m <sup>2</sup> ) | 21.08                | 28.26  | <0.001  | 21.87                   | 26.39  | <0.001  | 22.49             | 25.71  | <0.001  |

**Table 8** Chi-square test results of categorical variables for characteristics as well as MetS criteria variables of male

| Variables  | Item                          | Non-MetS |       | MetS  |       | p-value |
|------------|-------------------------------|----------|-------|-------|-------|---------|
|            |                               | n        | (%)   | n     | (%)   |         |
| Age        | Age≤40                        | 16,483   | 76.99 | 4,927 | 23.01 | <0.001  |
|            | 40<Age≤60                     | 13,813   | 67.17 | 6,752 | 32.83 |         |
|            | Age>60                        | 1,158    | 64.08 | 649   | 35.92 |         |
| Occupation | Professional-1                | 1,936    | 74.18 | 674   | 25.82 | <0.001  |
|            | Technical-2                   | 12,603   | 74.5  | 4,314 | 25.5  |         |
|            | Managerial-3                  | 5,704    | 67.48 | 2,749 | 32.52 |         |
|            | Sales-4                       | 4,516    | 70.47 | 1,892 | 29.53 |         |
|            | Service-5                     | 1,557    | 71.32 | 626   | 28.68 |         |
|            | Clerical and Administrative-6 | 1,558    | 73.94 | 549   | 26.06 |         |
|            | Manual Labor-7                | 2,127    | 72.79 | 795   | 27.21 |         |
|            | Taxi Driver-8                 | 1,453    | 66.59 | 729   | 33.41 |         |

**Table 9** Chi-square test results of categorical variables for characteristics as well as MetS criteria variables of female

| Variables  | Item                          | Non-MetS |       | MetS  |       | p-value |
|------------|-------------------------------|----------|-------|-------|-------|---------|
|            |                               | n        | (%)   | n     | (%)   |         |
| Age        | Age≤40                        | 14,977   | 93.77 | 995   | 6.23  | <0.001  |
|            | 40<Age≤60                     | 11,107   | 84.32 | 2,065 | 15.68 |         |
|            | Age>60                        | 394      | 67.93 | 186   | 32.07 |         |
| Occupation | Professional-1                | 3,410    | 91.23 | 328   | 8.77  | <0.001  |
|            | Technical-2                   | 2,313    | 91.06 | 227   | 8.94  |         |
|            | Managerial-3                  | 2,809    | 87.59 | 398   | 12.41 |         |
|            | Sales-4                       | 4,738    | 89.87 | 534   | 10.13 |         |
|            | Service-5                     | 2,655    | 88.15 | 357   | 11.85 |         |
|            | Clerical and Administrative-6 | 9,334    | 89.81 | 1,059 | 10.19 |         |
|            | Manual Labor-7                | 1,175    | 81.03 | 275   | 18.97 |         |
|            | Taxi Driver-8                 | 44       | 39.29 | 68    | 60.71 |         |

the two other groups.

## DISCUSSION

Owen et al. [24] reported that the average person spends (1) 71% of their daily waking hours in an inactive state and

**Table 10** Multiple logistic regression results for risk-factor associations when age  $\geq 60$ 

| Variables                | Condition  | OR   | 95%CI |      | p-value |
|--------------------------|------------|------|-------|------|---------|
| Occupation               | Group-I*   | 1.00 |       |      |         |
|                          | Group-II†  | 1.16 | 0.89  | 1.53 | 0.2708  |
|                          | Group-III‡ | 1.39 | 1.04  | 1.85 | 0.0247  |
| Gender                   | Male       | 1.00 |       |      |         |
|                          | Female     | 0.99 | 0.65  | 1.50 | 0.9657  |
| Weight(Kg)               |            | 1.06 | 1.04  | 1.08 | <0.001  |
| BMI                      |            | 1.10 | 1.03  | 1.18 | 0.0059  |
| Body Fat Percentage(%)   |            | 1.08 | 1.05  | 1.11 | <0.001  |
| LDL-C(mg/dl)             |            | 1.00 | 0.99  | 1.00 | 0.1646  |
| Total Cholesterol(mg/dl) |            | 1.00 | 1.00  | 1.01 | 0.1900  |

\*Group-I: General sedentary-related occupations

†Group-II: non sedentary-related occupations ‡Group-

III: sedentary-related occupations with high-SES

(2) only 30 min daily on moderate-intensity physical activity on most days of a week. As noted in the literature review in the introduction section, MetS likelihood significantly increases with sedentary time, and sedentary behavior [24, 39, 40]. Being sedentary also makes one significantly more likely to be obese [9], have poor cardiometabolic health [17, 32], and have poor cognitive health [26]. An increasing number of researchers are beginning to investigate the correlation of a sedentary occupation with MetS or CVD risk [9, 25, 26, 27, 29, 30].

However, most MetS risk factors have focused on lack of physical activity rather than sedentary occupation. These studies have noted that spending more time being passive increases metabolic risk [41, 42]. Recent research has also demonstrated that lifestyle and SES are significant risk factors for MetS [21, 22] and CVD [21, 43, 44]. Nonetheless, Kim et al. [45] argued that a causal relationship of SES with MetS and CVD risks—as indicated by the Framingham risk score—cannot be established by the current body of cross-sectional evidence. Furthermore, scholars have yet to investigate the role of occupation in MetS risk, with occupation further distinguished by sedentary status and SES associations. In particular, MetS risk is likely to differ between those working in typically sedentary white-collar occupations (such as doctors, professors, managers, and engineers) and those working in sedentary blue-collar occupations (such as administrative staff, service staff, and even taxi drivers).

We confirmed the importance of age and occupations as MetS risk factors for males and females in Table 8 and Table 9, respectively. Both aspects significantly influence the prevalence rate of MetS. We further stratified the cases into three age groups and eight occupation groups. Regarding the

eight occupations, both Manager-3 and Taxi Driver-8 consistently get MetS for males and females. However, Sales-4 of males came to third place, represented a high prevalence rate even though they belong to the non-sedentary group. It might be interesting for future research to discover the risk factor for Sales-4.

Due to the older age group having the highest prevalence of MetS, this study compared the three occupation categories for this age group. There is no difference between the general sedentary group and the non-sedentary group. The reason might be the Sales-4 of males represented a high prevalence rate which influenced the comparisons. However, those working in sedentary and high-SES-associated occupations of the older age group are at a higher risk of MetS than general sedentary and non-sedentary occupations. Hence, the people who are belonged this sedentary High-SES category should avoid prolonged sitting all day long.

## CONCLUSIONS

Although prolonged sitting is an ostensibly novel risk factor for health outcomes across all ages, its association must be replicated in occupational conditions [32]. In this study, we noted that age and occupation categories were risk factors for MetS. The study found that lawyers, teachers, accountants, doctors, nurses, engineers, managers, and taxi drivers, were high-risk groups for MetS, where taxi driving had the highest MetS prevalence. After the eight categories were grouped into three groups when the age is above 60, there is a significant difference. The sedentary and high-SES occupations (group-III) are likely to have MetS than the general sedentary occupations (group-I) and non-sedentary occupations (group-II). We



recommend for government authorities to focus on sedentary high-SES workers in their policies, particularly in tailoring health promotion programs to these groups, such as aerobic exercise [46] or physical activities [28, 47].

## ACKNOWLEDGEMENTS

We thank the Ministry of Science and Technology for supporting this research (grant numbers: MOST-107-2221-E-161-002 and MOST-108-2221-E-161-003-MY2). We also thank the Far Eastern Memorial Hospital for their support (grant number: NSC-RD-106-1-12-504). The authors would like to express their thanks for the aid rendered by Dr. Yen-Ling Chiu (Nephrologist) and Dr. Yen-Wen Wu (Cardiologist) of Far Eastern Memorial Hospital.

## FOOTNOTES

### Contributors

M.-S.C. (Ming-Shu Chen) conceived and designed the experiments; M.-S.C. and C.-H.C. (Chi-Hao Chiu) performed the experiments; C.-H.C., and S.-H.C. (Shih-Hsin Chen) analyzed the data; M.-S.C. were supervised the study; M.-S.C. contributed investigation material; M.-S.C., C.-H.C., and S.-H.C. wrote this paper together. S.-H.C. submitted this paper.

### Funding

This research was funded by a grant from the Ministry of Science and Technology in Taiwan (grant numbers: MOST-107-2221-E-161-002 & MOST-108-2221-E-161-003-MY2), and a funding from Far Eastern Memorial Hospital (ID: NSC-RD-106-1-12-504). The authors declare no conflict of interest. The founding sponsors had no role in the design of the study; in the collection, analyses, or interpretation of data; in the writing of the manuscript; or in the decision to publish the results.

## COMPETING INTERESTS

The authors declare no conflicts of interest concerning this study.

### Ethics approval

Ethical approval was obtained from the Research Ethics Review Committee at the Far Eastern Memorial Hospital in New Taipei City, Taiwan (Institutional Review Board approval number: FEMH-IRB-107126-E, v.02; board meeting and approval date: September 10, 2018). The MJ Health Research

Foundation also approved this study. This study also has a PPS receipt (ClinicalTrials.gov ID: NCT04142593, Date: October 25, 2019)

### Data sharing statement

We aggregate two databases from New Taipei City Government Annual Taxi Health Examination Survey by Far Eastern Memorial Hospital (FEMH), and the the MJ Health Check-Up--Based Population Database (MJPD) (2012--2016). The first dataset used in this study was restricted by the Research Ethics Review Committee of the Far Eastern Memorial Hospital (FEMH-IRB-107126-E, v.02) in order to protect participant privacy. The second dataset, MJPD, is accessible to researchers upon request. Please contact Dr. Ming-Shu Chen (email: tree1013@gmail.com) to obtain further information.

### Consent to patient and public involvement statement

No patient involved.

## REFERENCES

- 1 R Bethene Ervin. Prevalence of metabolic syndrome among adults 20 years of age and over, by sex, age, race and ethnicity, and body mass index: United states. *National health statistics reports*, 13:1–8, 2009.
- 2 Lee-Ching Hwang, Chyi-Huey Bai, and Chien-Jen Chen. Prevalence of obesity and metabolic syndrome in taiwan. *Journal of the Formosan Medical Association*, 105(8):626–635, 2006.
- 3 Apilak Worachartcheewan, Chanin Nantasenamat, Chartchalerm Isarankura-Na-Ayudhya, Phannee Pidetcha, and Virapong Prachayasittikul. Identification of metabolic syndrome using decision tree analysis. *Diabetes Research and Clinical Practice*, 90(1):e15–e18, 2010.
- 4 Yuan Ching, Yit Chin, Mahenderan Appukutty, Wan Gan, Vasudevan Ramachandran, and Yoke Chan. Prevalence of metabolic syndrome and its associated factors among vegetarians in malaysia. *International journal of environmental research and public health*, 15(9):2031, 2018.
- 5 SuJin Song, Hee Young Paik, Won O Song, and YoonJu Song. Metabolic syndrome risk factors are associated with white rice intake in korean adolescent girls and boys. *British Journal of Nutrition*, 113(3):479–487, 2015.
- 6 Hideo Matsuura, Kanae Mure, Nobuhiro Nishio, Naomi Kitano, Naoko Nagai, and Tatsuya Takeshita. Relationship

- between coffee consumption and prevalence of metabolic syndrome among japanese civil servants. *Journal of epidemiology*, 22(2):160–166, 2012.
- 7 Ming-Shu Chen and Shih-Hsin Chen. A data-driven assessment of the metabolic syndrome criteria for adult health management in taiwan. *International journal of environmental research and public health*, 16(1):92, 2019.
- 8 Xinghua Yang, Qiushan Tao, Feng Sun, and Siyan Zhan. The impact of socioeconomic status on the incidence of metabolic syndrome in a taiwanese health screening population. *International Journal of Public Health*, 57(3):551–559, 2012.
- 9 Markus Strauß, Peter Foshag, Bianca Przybylek, Marc Horlitz, Alejandro Lucia, Fabian Sanchis-Gomar, and Roman Leischik. Occupation and metabolic syndrome: is there correlation? a cross sectional study in different work activity occupations of german firefighters and office workers. *Diabetology & metabolic syndrome*, 8(1):57, 2016.
- 10 Enzo Bonora, Stefan Kiechl, Johann Willeit, Friedrich Oberhollenzer, Georg Egger, Riccardo C Bonadonna, and Michele Muggeo. Carotid atherosclerosis and coronary heart disease in the metabolic syndrome: prospective data from the bruneck study. *Diabetes care*, 26(4):1251–1257, 2003.
- 11 Joseph Henson, David W Dunstan, Melanie J Davies, and Thomas Yates. Sedentary behaviour as a new behavioural target in the prevention and treatment of type 2 diabetes. *Diabetes/metabolism research and reviews*, 32(S1):213–220, 2016.
- 12 Robert L Hanson, Giuseppina Imperatore, Peter H Bennett, and William C Knowler. Components of the “metabolic syndrome” and incidence of type 2 diabetes. *Diabetes*, 51(10):3120–3127, 2002.
- 13 Peter WF Wilson, Ralph B D’Agostino, Helen Parise, Lisa Sullivan, and James B Meigs. Metabolic syndrome as a precursor of cardiovascular disease and type 2 diabetes mellitus. *Circulation*, 112(20):3066–3072, 2005.
- 14 BO Isomaa, Peter Almgren, Tiinamaija Tuomi, Björn Forsén, Kaj Lahti, Michael Nissén, Marja-Riitta Taskinen, and Leif Groop. Cardiovascular morbidity and mortality associated with the metabolic syndrome. *Diabetes care*, 24(4):683–689, 2001.
- 15 Ann Marie McNeill, Ronit Katz, Cynthia J Girman, Wayne D Rosamond, Lynne E Wagenknecht, Joshua I Barzilay, Russell P Tracy, Peter J Savage, and Sharon A Jackson. Metabolic syndrome and cardiovascular disease in older people: the cardiovascular health study. *Journal of the American Geriatrics Society*, 54(9):1317–1324, 2006.
- 16 MusaSaulawaIbrahim, DongPang, GurchRandhawa, and Yannis Pappas. Risk models and scores for metabolic syndrome: systematic review protocol. *BMJ open*, 9(9):e027326, 2019.
- 17 Kishan Bakrania, Charlotte L Edwardson, Danielle H Bodicoat, Dale W Esliger, Jason MR Gill, Aadil Kazi, Latha Velayudhan, Alan J Sinclair, Naveed Sattar, Stuart JH Biddle, et al. Associations of mutually exclusive categories of physical activity and sedentary time with markers of cardiometabolic health in english adults: a cross-sectional analysis of the health survey for england. *BMC public health*, 16(1):25, 2016.
- 18 Salvatore Carbone, Danielle L Kirkman, Ryan S Garten, Paula Rodriguez-Miguel, Enrique G Artero, Duck-chul Lee, and Carl J Lavie. Muscular strength and cardiovascular disease: an updated state-of-the-art narrative review. *Journal of Cardiopulmonary Rehabilitation and Prevention*, 40(5):302–309, 2020.
- 19 Jason Brocato, Fen Wu, Yu Chen, Magdy Shamy, Mansour A Alghamdi, Mamdouh I Khoder, Alser A Alkhatim, Mamdouh H Abdou, and Max Costa. Association between sleeping hours and cardiometabolic risk factors for metabolic syndrome in a saudi arabian population. *BMJ open*, 5(11), 2015.
- 20 Jui Hua Huang, Ren Hau Li, Shu Ling Huang, Hon Ke Sia, Yu Ling Chen, and Feng Cheng Tang. Lifestyle factors and metabolic syndrome among workers: The role of interactions between smoking and alcohol to nutrition and exercise. *International Journal of Environmental Research Public Health*, 12(12):15967–15978, 2015.
- 21 Chen-Mao Liao and Chih-Ming Lin. Life course effects of socioeconomic and lifestyle factors on metabolic syndrome and 10-year risk of cardiovascular disease: A longitudinal study in taiwan adults. *International Journal of Environmental Research and Public Health*, 15(10):2178, 2018.
- 22 R Mehrdad, G Pouryaghou, and M Moradi. Association between metabolic syndrome and job rank. *Int J Occup Environ Med*, 9(1):45–51, 2018.
- 23 Andrea Bankoski, Tamara B Harris, James J McClain, Robert J Brychta, Paolo Caserotti, Kong Y Chen, David

- Berrigan, Richard P Troiano, and Annemarie Koster. Sedentary activity associated with metabolic syndrome independent of physical activity. *Diabetes care*, 34(2):497–503, 2011.
- 24 Neville Owen, Geneviève N Healy, Charles E Matthews, and David W Dunstan. Too much sitting: the population-health science of sedentary behavior. *Exercise and sport sciences reviews*, 38(3):105, 2010.
- 25 Maria Aguilar, Taft Bhuket, Sharon Torres, Benny Liu, and Robert J Wong. Prevalence of the metabolic syndrome in the united states, 2003-2012. *Jama*, 313(19):1973–1974, 2015.
- 26 Kishan Bakrania, Charlotte L Edwardson, Kamlesh Khunti, Stephan Bandelow, Melanie J Davies, and Thomas Yates. Associations between sedentary behaviours and cognitive function: cross-sectional and prospective findings from the uk biobank. *American Journal of Epidemiology*, 2017.
- 27 Duk Cho and Jung-Wan Koo. Differences in metabolic syndrome prevalence by employment type and sex. *International journal of environmental research and public health*, 15(9):1798, 2018.
- 28 Carl J Lavie, Cemal Ozemek, Salvatore Carbone, Peter T Katzmarzyk, and Steven N Blair. Sedentary behavior, exercise, and cardiovascular health. *Circulation research*, 124(5):799–815, 2019.
- 29 Asuka Sakuraya, Kazuhiro Watanabe, Norito Kawakami, Kotaro Imamura, Emiko Ando, Yumi Asai, Hisashi Eguchi, Yuka Kobayashi, Norimitsu Nishida, Hideaki Arima, et al. Work-related psychosocial factors and onset of metabolic syndrome among workers: a systematic review and meta-analysis protocol. *BMJ open*, 7(6):e016716, 2017.
- 30 Seung Yong Shin, Chul Gab Lee, Han Soo Song, Sul Ha Kim, Hyun Seung Lee, Min Soo Jung, and Sang Kon Yoo. Cardiovascular disease risk of bus drivers in a city of Korea. *Annals of occupational and environmental medicine*, 25(1):34, 2013.
- 31 Roman Leischik, Peter Foshag, Markus Strauß, Henning Littwitz, Pankaj Garg, Birgit Dworrak, and Marc Horlitz. Aerobic capacity, physical activity and metabolic risk factors in firefighters compared with police officers and sedentary clerks. *PloS one*, 10(7):e0133113, 2015.
- 32 Chutima Jalayondeja, Wattana Jalayondeja, Keerin Mekhora, Petcharatana Bhuanantanondh, Asadang Dusadi-Isariyavong, and Rujiret Upiriyasakul. Break in sedentary behavior reduces the risk of noncommunicable diseases and cardiometabolic risk factors among workers in a petroleum company. *International journal of environmental research and public health*, 14(5):501, 2017.
- 33 Markus Strauss, Peter Foshag, and Roman Leischik. Prospective evaluation of cardiovascular, cardiorespiratory, and metabolic risk of German office workers in comparison to international data. *International journal of environmental research and public health*, 17(5):1590, 2020.
- 34 Mohamed Hamad Al-Thani, Sohaila Cheema, Javaid Sheikh, Ravinder Mamtani, Albert B Lowenfels, Walaa Fattah Al-Chetachi, Badria Ali Almalki, Shamseldin Ali Hassan Khalifa, Ahmad Omar Haj Bakri, Patrick Maisonneuve, et al. Prevalence and determinants of metabolic syndrome in Qatar: results from a national health survey. *BMJ open*, 6(9), 2016.
- 35 Anne Kouvonen, Mika Kivimäki, Marko Elovainio, Jaana Pentti, Anne Linna, Marianna Virtanen, and Jussi Vahtera. Effort/reward imbalance and sedentary lifestyle: an observational study in a large occupational cohort. *Occupational and environmental medicine*, 63(6):422–427, 2006.
- 36 R Leischik, B Dworrak, M Strauss, B Przybyłek, D Schöne, M Horlitz, A Mügge, and T Dworrak. Plasticity of health. *German Journal of Medicine*, 1:1–17, 2016.
- 37 Pamela S Cain and Donald J Treiman. The dictionary of occupational titles as a source of occupational data. *American Sociological Review*, pages 253–278, 1981.
- 38 Proper K. I. Hildebrandt V. H. Jans, M. P. Sedentary behavior in Dutch workers: differences between occupations and business sectors. *American journal of preventive medicine*, 33(6):450–454, 2007.
- 39 Earl S Ford, Harold W Kohl, Ali H Mokdad, and Umed A Ajani. Sedentary behavior, physical activity, and the metabolic syndrome among US adults. *Obesity*, 13(3):608–614, 2005.
- 40 Katrien Wijndaele, N Duvigneaud, Lynn Matton, William Duquet, Christophe Delecluse, Martine Thomis, Gaston Beunen, Johan Lefevre, and RM Philippaerts. Sedentary behaviour, physical activity and a continuous metabolic syndrome risk score in adults. *European journal of clinical nutrition*, 63(3):421, 2009.
- 41 Geneviève N Healy, Katrien Wijndaele, David W Dunstan, Jonathan E Shaw, Jo Salmon, Paul Z Zimmet, and Neville

- 1  
2  
3 Owen. Objectively measured sedentary time, physical activity, and metabolic risk. *Diabetes care*, 31(2):369–371, 2008.
- 4  
5  
6  
7 42 RJ Shephard. Breaks in sedentary time: Beneficial associations with metabolic risk. Healy GN, Dunstan DW, Salmon J, et al (The Univ of Queensland, Brisbane, Australia; The International Diabetes Inst, Melbourne, Australia; Deakin Univ, Melbourne, Australia; et al) *Diabetes Care* 31: 661–666, 2008. *Year Book of Sports Medicine*, 2010:183–185, 2010.
- 8  
9  
10  
11  
12  
13  
14  
15  
16 43 Eric B Loucks, David H Rehkopf, Rebecca C Thurston, and Ichiro Kawachi. Socioeconomic disparities in metabolic syndrome differ by gender: evidence from NHANES III. *Annals of Epidemiology*, 17(1):19–26, 2007.
- 17  
18  
19  
20  
21 44 Sunmi Yoo, Hong-Jun Cho, and Young-Ho Khang. General and abdominal obesity in South Korea, 1998–2007: gender and socioeconomic differences. *Preventive Medicine*, 51(6):460–465, 2010.
- 22  
23  
24  
25  
26 45 Ji Young Kim, Sung Hi Kim, and Yoon Jeong Cho. Socioeconomic status in association with metabolic syndrome and coronary heart disease risk. *Korean Journal of Family Medicine*, 34(2):131, 2013.
- 27  
28  
29  
30  
31 46 Esmée A Bakker, Duck-chul Lee, Xuemei Sui, Enrique G Artero, Jonatan RRuiz, Thijs MHEijsvogels, Carl J Lavie, and Steven N Blair. Association of resistance exercise, independent of and combined with aerobic exercise, with the incidence of metabolic syndrome. In *Mayo Clinic Proceedings*, volume 92, pages 1214–1222. Elsevier, 2017.
- 32  
33  
34  
35  
36  
37  
38 47 Gerald F Fletcher, Carolyn Landolfo, Josef Niebauer, Cermal Ozemek, Ross Arena, and Carl J Lavie. Promoting physical activity and exercise: JACC health promotion series. *Journal of the American College of Cardiology*, 72(14):1622–1639, 2018.
- 39  
40  
41  
42  
43  
44  
45  
46  
47  
48  
49  
50  
51  
52  
53  
54  
55  
56  
57  
58  
59  
60

1  
2  
3  
4  
5  
6  
7  
8  
9  
10  
11  
12  
13  
14  
15  
16  
17  
18  
19  
20  
21  
22  
23  
24  
25  
26  
27  
28  
29  
30  
31  
32  
33  
34  
35  
36  
37  
38  
39  
40  
41  
42  
43  
44  
45  
46  
47  
48  
49  
50  
51  
52  
53  
54  
55  
56  
57  
58  
59  
60STROBE Statement—Checklist of items that should be included in reports of *case-control studies*

| Item                         | No  | Recommendation                                                                                                                                                                                    | Page No      |
|------------------------------|-----|---------------------------------------------------------------------------------------------------------------------------------------------------------------------------------------------------|--------------|
| Title and abstract           | 1   | (a) Indicate the study's design with a commonly used term in the title or the abstract                                                                                                            | Page 1       |
|                              |     | (b) Provide in the abstract an informative and balanced summary of what was done and what was found                                                                                               | Page 1       |
| <b>Introduction</b>          |     |                                                                                                                                                                                                   |              |
| Background/rationale         | 2   | Explain the scientific background and rationale for the investigation being reported                                                                                                              | Page 1-2     |
| Objectives                   | 3   | State specific objectives, including any prespecified hypotheses                                                                                                                                  | Page 1-2     |
| <b>Methods</b>               |     |                                                                                                                                                                                                   |              |
| Study design                 | 4   | Present key elements of study design early in the paper                                                                                                                                           | Page 2-3     |
| Setting                      | 5   | Describe the setting, locations, and relevant dates, including periods of recruitment, exposure, follow-up, and data collection                                                                   | Page 2-3     |
| Participants                 | 6   | (a) Give the eligibility criteria, and the sources and methods of case ascertainment and control selection. Give the rationale for the choice of cases and controls                               | Page 3       |
|                              |     | (b) For matched studies, give matching criteria and the number of controls per case                                                                                                               | Page 2-3     |
| Variables                    | 7   | Clearly define all outcomes, exposures, predictors, potential confounders, and effect modifiers. Give diagnostic criteria, if applicable                                                          | NA           |
| Data sources/<br>measurement | 8*  | For each variable of interest, give sources of data and details of methods of assessment (measurement). Describe comparability of assessment methods if there is more than one group              | Page 2-3     |
| Bias                         | 9   | Describe any efforts to address potential sources of bias                                                                                                                                         | Page 1 and 7 |
| Study size                   | 10  | Explain how the study size was arrived at                                                                                                                                                         | NA           |
| Quantitative variables       | 11  | Explain how quantitative variables were handled in the analyses. If applicable, describe which groupings were chosen and why                                                                      | Page 3       |
| Statistical methods          | 12  | (a) Describe all statistical methods, including those used to control for confounding                                                                                                             | Page 2-3     |
|                              |     | (b) Describe any methods used to examine subgroups and interactions                                                                                                                               | Page 2-3     |
|                              |     | (c) Explain how missing data were addressed                                                                                                                                                       | Page 2-3     |
|                              |     | (d) If applicable, explain how matching of cases and controls was addressed                                                                                                                       | Page 2-3     |
|                              |     | (e) Describe any sensitivity analyses                                                                                                                                                             | Page 2-3     |
| <b>Results</b>               |     |                                                                                                                                                                                                   |              |
| Participants                 | 13* | (a) Report numbers of individuals at each stage of study—eg numbers potentially eligible, examined for eligibility, confirmed eligible, included in the study, completing follow-up, and analysed | Page 4-7     |
|                              |     | (b) Give reasons for non-participation at each stage                                                                                                                                              | Page 4-7     |
|                              |     | (c) Consider use of a flow diagram                                                                                                                                                                | Page 4-7     |
| Descriptive data             | 14* | (a) Give characteristics of study participants (eg demographic, clinical, social) and information on exposures and potential confounders                                                          | Page 4-7     |

|                          |     |                                                                                                                                                                                                              |                     |
|--------------------------|-----|--------------------------------------------------------------------------------------------------------------------------------------------------------------------------------------------------------------|---------------------|
|                          |     | (b) Indicate number of participants with missing data for each variable of interest                                                                                                                          | Page 4-7            |
| Outcome data             | 15* | Report numbers in each exposure category, or summary measures of exposure                                                                                                                                    | Page 4-7            |
| Main results             | 16  | (a) Give unadjusted estimates and, if applicable, confounder-adjusted estimates and their precision (eg, 95% confidence interval). Make clear which confounders were adjusted for and why they were included | Table 4-9           |
|                          |     | (b) Report category boundaries when continuous variables were categorized                                                                                                                                    | Table 4-9           |
|                          |     | (c) If relevant, consider translating estimates of relative risk into absolute risk for a meaningful time period                                                                                             | Table 4-9           |
| Other analyses           | 17  | Report other analyses done—eg analyses of subgroups and interactions, and sensitivity analyses                                                                                                               | Page 4-7            |
| <b>Discussion</b>        |     |                                                                                                                                                                                                              |                     |
| Key results              | 18  | Summarise key results with reference to study objectives                                                                                                                                                     | Page 1 and Page 7-8 |
| Limitations              | 19  | Discuss limitations of the study, taking into account sources of potential bias or imprecision. Discuss both direction and magnitude of any potential bias                                                   | Page 1 and 7        |
| Interpretation           | 20  | Give a cautious overall interpretation of results considering objectives, limitations, multiplicity of analyses, results from similar studies, and other relevant evidence                                   | Page 1 and 7        |
| Generalisability         | 21  | Discuss the generalisability (external validity) of the study results                                                                                                                                        | Page 7-8            |
| <b>Other information</b> |     |                                                                                                                                                                                                              |                     |
| Funding                  | 22  | Give the source of funding and the role of the funders for the present study and, if applicable, for the original study on which the present article is based                                                | Page 8              |

\*Give information separately for cases and controls.

**Responding: This study is not a typical “case-control studies” and research design, we only on the major study subjects to select the appropriate study objects to compare in this study.**

**Note:** An Explanation and Elaboration article discusses each checklist item and gives methodological background and published examples of transparent reporting. The STROBE checklist is best used in conjunction with this article (freely available on the Web sites of PLoS Medicine at <http://www.plosmedicine.org/>, Annals of Internal Medicine at <http://www.annals.org/>, and Epidemiology at <http://www.epidem.com/>). Information on the STROBE Initiative is available at <http://www.strobe-statement.org>.

# BMJ Open

## Risk assessment of metabolic syndrome prevalence involving sedentary occupations and socioeconomic status

|                                 |                                                                                                                                                                                                                                                                  |
|---------------------------------|------------------------------------------------------------------------------------------------------------------------------------------------------------------------------------------------------------------------------------------------------------------|
| Journal:                        | <i>BMJ Open</i>                                                                                                                                                                                                                                                  |
| Manuscript ID                   | bmjopen-2020-042802.R3                                                                                                                                                                                                                                           |
| Article Type:                   | Original research                                                                                                                                                                                                                                                |
| Date Submitted by the Author:   | 17-Jun-2021                                                                                                                                                                                                                                                      |
| Complete List of Authors:       | Chen, Ming-Shu; Oriental Institute of Technology, Department of Health Care Administration<br>Chiu, Chi-Hao; Far Eastern Memorial Hospital, Department of Medical Affairs<br>Chen, Shih-Hsin; Cheng Shiu University, Information Management                      |
| <b>Primary Subject Heading</b>: | Occupational and environmental medicine                                                                                                                                                                                                                          |
| Secondary Subject Heading:      | Health informatics                                                                                                                                                                                                                                               |
| Keywords:                       | Other metabolic, e.g. iron, porphyria < DIABETES & ENDOCRINOLOGY, Health policy < HEALTH SERVICES ADMINISTRATION & MANAGEMENT, Risk management < HEALTH SERVICES ADMINISTRATION & MANAGEMENT, PUBLIC HEALTH, Health informatics < BIOTECHNOLOGY & BIOINFORMATICS |
|                                 |                                                                                                                                                                                                                                                                  |

SCHOLARONE™  
Manuscripts



I, the Submitting Author has the right to grant and does grant on behalf of all authors of the Work (as defined in the below author licence), an exclusive licence and/or a non-exclusive licence for contributions from authors who are: i) UK Crown employees; ii) where BMJ has agreed a CC-BY licence shall apply, and/or iii) in accordance with the terms applicable for US Federal Government officers or employees acting as part of their official duties; on a worldwide, perpetual, irrevocable, royalty-free basis to BMJ Publishing Group Ltd ("BMJ") its licensees and where the relevant Journal is co-owned by BMJ to the co-owners of the Journal, to publish the Work in this journal and any other BMJ products and to exploit all rights, as set out in our [licence](#).

The Submitting Author accepts and understands that any supply made under these terms is made by BMJ to the Submitting Author unless you are acting as an employee on behalf of your employer or a postgraduate student of an affiliated institution which is paying any applicable article publishing charge ("APC") for Open Access articles. Where the Submitting Author wishes to make the Work available on an Open Access basis (and intends to pay the relevant APC), the terms of reuse of such Open Access shall be governed by a Creative Commons licence – details of these licences and which [Creative Commons](#) licence will apply to this Work are set out in our licence referred to above.

Other than as permitted in any relevant BMJ Author's Self Archiving Policies, I confirm this Work has not been accepted for publication elsewhere, is not being considered for publication elsewhere and does not duplicate material already published. I confirm all authors consent to publication of this Work and authorise the granting of this licence.



# Risk assessment of metabolic syndrome prevalence involving sedentary occupations and socioeconomic status

Ming-Shu Chena, Chi-Hao Chiub, and Shih-Hsin Chen\*c

*a*Department of Healthcare Administration, Oriental Institute of Technology, No.58, Sec. 2, Sichuan Rd., Pan-Chiao Dist., New Taipei City 22061, Taiwan (R.O.C.)

*b*Department of Medical Affairs, Far Eastern Memorial Hospital, No.21, Sec. 2, Nanya S. Rd., Banqiao Dist., New Taipei City 22061, Taiwan (R.O.C.)

*c*Department of Information Management, Cheng Shiu University, No.840, Chengcing Rd., Niasong Dist., Kaohsiung City 83347, Taiwan (R.O.C.)

## ABSTRACT

**Objectives:** To determine the association between metabolic syndrome (MetS) prevalence and occupation—distinguished by being sedentary and non-sedentary and by socioeconomic status (SES). Eight occupation categories are extensively considered. Numerous occupations, lawyers, teachers, engineers, senior section chiefs of enterprises, taxi driving, and so on are considered.

**Methods:** We analyzed two data sets with 73,506 cases. MetS was identified according to the criteria of the modified Adult Treatment Panel III. A multiple logistic regression algorithm was used to test factors for three age segments. We employed R for Windows (version 3.5.1) for all statistical analyses.

**Results:** MetS prevalence rate is increasing according to age growth. In addition, even though the prevalence rate of age  $\leq 40$  is only 6.23%, the non-sedentary-related occupations (OR = 0.88,  $p < 0.0295$ ) are significantly lower than the ones of general sedentary-related occupations and sedentary-related occupations with high-SES. If the age is above 60, MetS was substantially more likely for sedentary high-SES occupations (OR = 1.39,  $p < 0.0247$ ) than those working in general sedentary fields associated with no particular SES and non-sedentary job.

**Conclusions:** The occupational sedentary behavior might influence the MetS in different age groups. Non-sedentary occupations have less risk of having MetS for the younger generation. High-SES and sedentary occupations above 60 increased the MetS risk significantly. We suggest that the authorities focus on the high-SES and sedentary occupations.

**Keywords:** Sedentary occupation, Metabolic Syndrome, Risk assessment, Regression Model

### Strengths and limitations of this study

- We might be the first one to evaluate sedentary/non-sedentary occupations and by SES extensively.
- Two data sets with 64,578 cases were employed.
- Three occupation groups include general sedentary-related, non-sedentary related, and sedentary-related with high-SES.
- Chi-square test are used to evaluate the categorical factors of in three age groups and occupations, and multiple logistic regression tests the risk-factor associations
- The main limitations of this study is that the data was only collected in Taiwan, which might be not the same for other countries.

## INTRODUCTION

MetS has been established as a public health concern in Western countries and is an increasingly severe public health problem in numerous countries. In the United States, 34% of adults satisfy the MetS criteria, which was formulated in the National Cholesterol Education Program Adult Treatment Panel (NCEP ATP III); in particular, US adults aged more than 60 years are more prone to having MetS [1]. The health sta-

Corresponding author: shchen@csu.edu.tw

tus of the Taiwanese population was estimated in 2002 using the data of 7566 participants in a nationwide cross-sectional population-based survey, named the Taiwanese Survey on Prevalence of Hyperglycemia, Hyperlipidemia, and Hypertension (TwSHHH). Hwang et al. [2] reported that the prevalence of MetS in women increases rapidly after the menopausal period to become higher than that in men; they also noted MetS' high correlations with age as well as overweight and obesity. In other Asian countries, MetS is also an important health issue, and studies on MetS have been conducted in Thailand [3], Malaysia [4], South Korea [5], and Japan [6] in addition to studies in Taiwan [2, 7, 8].

MetS is highly correlated with overweight and obesity [2, 9], and it comprises a constellation of interrelated metabolic disorders—including hypertension [10], type 2 diabetes mellitus (T2DM) [11, 12, 13], cardiovascular disease (CVD) [13, 14], and stroke [15]. In addition, people with MetS have fivefold diabetes [16]. The scholarly evidence has also preponderantly indicated that individuals with MetS or a sedentary occupation had increased the incidence of T2DM and coronary heart disease, as well as increased mortality due to CVD [11, 12, 13, 14, 17]. The other study also pointed out the reduced muscular strength is also associated with increased CVD and CVD-related mortality [18].

As a result, the reasons causing MetS must be investigated. The risk factors for MetS include aging, sedentary, long working hours, physical inactivity, Western diet, sleep duration greater than 7 hours [19], and high occupational stress [20]. Socioeconomic status (SES) and lifestyle are the possible risk factors for MetS [21, 22]. Of these factors, prolonged sitting is an apparent risk factor for negative health outcomes across all ages due to the rapid automation of the workplace [23, 24]. More recent studies have begun discussing the correlation of sedentary occupation with MetS or CVD risk [9, 25, 26, 27, 28, 29, 30].

Bakrania et al. [26] demonstrated that sedentary behavior affects not only physical but also cognitive health. Leischik et al. [31] compared the 97 firefighters, 55 police officers, and 46 sedentary office workers in German. Sedentary occupations show to be associated with obesity and metabolic syndrome in middle-aged men. The other study on workers in a petroleum company reported that sedentary behavior—specifically for ten h/day with two-thirds of those ten h spent sitting at work—was significantly associated with cardiometabolic risk factors [32]. An individual having a sedentary occupation is substantially more likely to be obese. Strauß et al. [9] found that office workers had a significantly greater abdominal waist circumference (WC) than do firefighters and that 33% of sedentary German office workers had MetS. Later on, Strauß et al. [33]

further evaluated the 10-year cardiovascular risk for 46 office workers in German by using the Framingham score. The office workers have a tendency cardiovascular risk and a higher rate of MetS.

However, its risk association must be replicated concerning the occupational condition or SES [22, 32, 34, 35]. SES is a combination of salary, social status, and education and can be evaluated by occupation or work status [36]. Al-Thani et al. [34] shown that no statistically significant association was founded for occupation. Mehrdad et al. [22] found the association between MetS and three job ranks in a company didn't cause a significant difference. Therefore, this study focused on MetS prevalence—and the related chronic disease biochemical test indexes—concerning occupation among adults in Taiwan. The current study focused on sedentary occupations and occupations associated with different SES conditions.

Finally, although numerous studies include some occupations or SES condition [22, 32, 34, 35], this research might be the first one to study those in sedentary or more high-SES-associated occupations, especially occupations that increase MetS risk, which hasn't explored yet by prior researches. There are eight major occupations and then allocated into three groups: general sedentary occupation, non-sedentary occupation, and sedentary occupations with high-SES. Our hypothesis includes a difference between the sedentary occupation and high-SES would cause higher MetS prevalence. The following section explains the methods used in this paper.

## METHODS

### Definition of a sedentary occupation and SES

According to the US Department of Labor's Dictionary of Occupational Titles, sedentary work is the occasional exertion of >10 lbs of force and/or a frequent exertion of a negligible amount of force. In this definition, "occasional" and "frequent" are defined as being present <1/3 and 1/3–2/3 of the time, respectively. Such force can be used to lift, carry, push, pull, or move objects—including the human body. Sedentary work involves sitting most of the time, but it may involve walking or standing for brief periods. Thus, a job was defined to be sedentary if walking and standing are required only occasionally, and all other sedentary criteria are met [37]. In this research, we select the taxi drivers, clerical, and administrative jobs as the representative belonged to the sedentary-related occupations in comparison with other non-sedentary-related, and sedentary-related high-SES jobs in the analysis to compare three categories of occupations. The rationale and hypothesis of this study are based on the previous

studies to determine whether sedentary-related careers have a higher risk of developing MetS, and at the same time, compare the differences between high-SES and non-SES in sedentary occupations.

We employed eight occupational categories: Professional-1, Technical-2, Managerial-3, Sales-4, Service-5, Clerical and Administrative-6, Manual Labor-7, and Taxi Driving-8. The detailed occupations of the Professional-1, Technical-2, and Managerial-3 categories are shown in Table 1. According to Jans et al. [38], there are differences in sitting time among occupational groups and business sectors in Dutch. We put the occupation categories into three groups: general sedentary-related (Group-I), non-sedentary (Group-II), and sedentary-related and high-SES (Group-III), based on occupational environment and social-economic status (SES) of occupations. The arrangement of the eight works is illustrated in Table 2.

### Definition of MetS

MetS was defined in this study according to guidelines from the Health Promotion Administration of Taiwan's Ministry of Health and Welfare. MetS prevalence was evaluated using the definitions of the modified ATP III and the MetS criteria for Taiwanese (MetS-TW). Five major factors were used to determine whether a person had MetS: WC, high blood pressure, fasting blood sugar (BS), triglyceride (TG) level, and HDL-C level. High blood pressure included the rates of systolic blood pressure (SBP) and diastolic blood pressure (DBP). Specifically, a Taiwanese person is defined as having MetS if they have three or more of the following five conditions in the ATP III: abdominal obesity, high TG, low HDL-C, hypertension, and hyperglycemia; the rules are detailed in Table 3.

### Data resource and data collection

We obtained two datasets from the New Taipei City Government Annual Taxi Health Examination Survey and MJ Health Check-Up-Based Population Database (MJPD). The duration of the first dataset covered the 2012–2016 period and was conducted by Far Eastern Memorial Hospital (FEMH)<sup>2</sup>. The second dataset MJPD was collected from four MJ clinics, which provide periodic health examinations to their members, which is accessible to researchers upon request<sup>3</sup>.

All of the data sets used in this study were authorized and given to this study's researchers by the MJPD Health Research Foundation with FEMH IRB approval. The laboratory data

<sup>2</sup>FEMH is one of the only hospitals that mainly undertakes the annual health check-up of taxi drivers in New Taipei City, and it is also the hospital with the most significant number of services and the largest hospital in New Taipei City

<sup>3</sup><http://www.mjhrf.org/main/page/release1/en/release01>

of the two databases were obtained from the same biochemical examination apparatus (Hitachi-7600). The two datasets conform to the ISO-15189 guidelines. Regarding ethical data use, the protocol of this study was approved by the Research Ethics Review Committee at FEMH (FEMH-IRB-107126-E and ) and the MJ Health Research Foundation.

### Data preprocessing

In the beginning, any personal information of all individuals was removed to protect their privacy from the two datasets. The MJPD database had 71,212 cases (41,600 male and 29,612 female) after we excluded the data entries with the occupational category "Others" and "missing values" for data analysis. The FEMH database had 2,294 cases of taxi drivers (2,182 male and 112 female). After combining the two databases, there are 73,506 records in total. MetS was identified based on the NCEP ATP III MetS criteria, and MetS prevalence was calculated.

Because age has been demonstrated to be an essential influence on MetS risk, we stratified the data into  $\leq 40$ , 40 to 60, and  $\geq 60$ -year-old groups. We focused on the effect on MetS risk from occupation—distinguished first by whether the field is sedentary versus or non-sedentary and second by the occupation's association with SES.

### Statistical analysis

This study's statistical analysis and graphs were performed using an R (v3.5.1) package for multiple logistic regression. A p-value of  $< 0.05$  indicated statistical significance between the two test populations. In the univariate analysis, a two-sample independent *t* test was adopted to analyze the difference in the mean value of continuous variables between participants with and without MetS. An exact chi-square test was used to define the differences between categorical variables. Multiple logistic regression was used to determine the effect of all influential variables.

## RESULTS

We analyzed the dataset by gender, height, weight, WC, blood pressure, TG level, HDL-C, SBP, DBP, and fasting BS. We computed the BMI from the height and weight data. In the next sub-sections, we present the descriptive statistics and the correlations among factors.

**Table 1** Detail Occupation groups in the Professional-1, Technical-2, and Managerial-3 categories

| Categories     | Occupations                                                                  |
|----------------|------------------------------------------------------------------------------|
| Professional-1 | Lawyers, teachers, accountants, and nurses                                   |
| Technical-2    | Engineers, architects, and programmers                                       |
| Managerial-3   | Senior executives of government departments or section chiefs of enterprises |

**Table 2** Sedentary versus non-sedentary occupation categories association with SES

| Group number | Type                           | Categories                                                  |
|--------------|--------------------------------|-------------------------------------------------------------|
| Group-I      | General sedentary-related      | Service-5, Clerical and Administrative-6, and Taxi Driver-8 |
| Group-II     | Non sedentary-related          | Sales-4, and Manual Labor-7                                 |
| Group-III    | Sedentary-related and high-SES | Professional-1, Technical-2, and Managerial-3               |

**Table 3** MetS criteria

| No. | Factors                                      | Abnormal Condition                       |
|-----|----------------------------------------------|------------------------------------------|
| 1   | Fasting Plasma Glucose (FPG)                 | FPG $\geq$ 100mg/dL                      |
| 2   | High Density Lipoprotein Cholesterol (HDL-C) | Male $<$ 40mg/dL or Female $<$ 50mg/dL   |
| 3   | High Blood Pressure                          | SBP $\geq$ 130mmHg or DBP $\geq$ 85mmHg  |
| 4   | Triglyceride (TG)                            | TG $\geq$ 150mg/dL                       |
| 5   | Waist Circumference (WC)                     | Male $\geq$ 90 cm or Female $\geq$ 80 cm |

## Descriptive Statistics

Of these 73,506 cases, 57,932 did not have MetS and 15,574 had MetS. MetS prevalence in this study thus was 21.19%. We conducted comparisons for the various physiological parameters, such as weight, SBP, and DBP for males and females in Table 4 and Table 5, respectively. Compared with MetS, individuals without MetS were healthier: their weight, SBP, WC, TG level, and BMI were lower, and their HDL-C level was greater. All characteristics were significantly related to MetS ( $p < 0.001$ ).

We further stratified the cases into three age groups, including the younger age group ( $\leq 40$  years old), the middle-aged group (40–60 years old), and the older age group ( $> 60$  years old). Table 6 and Table 7 detail the age-stratified data of male and female, respectively. MetS prevalence of males was 23.01%, 32.83%, and 35.92% for the younger, middle-aged, and older age groups, respectively. The prevalence rates of the female are 6.23%, 15.68%, and 32.07% for the younger, middle-aged, and older age groups, respectively. The result is consistent with studies reporting that MetS becomes more likely with age [1, 15]. Furthermore, as noted in Table 6 and Table 7, most factors—such as weight, SBP, DBP, and WC—were significantly related ( $p < 0.001$ ) to MetS prevalence for all age groups, identical to the findings for the unstratified data in Table 4 and Table 5.

## Chi-square exact test and multiple logistic regression analysis

Because some variables for characteristics were categorical, we used a chi-square test to analyze the relationships among them for males and females in Table 8 and Table 9, respectively. We marked some important information in bold. Age and occupation were significantly associated with MetS ( $p < 0.001$ ). To explore the public perception of risk indicators of MetS, we further analyzed the eight aforementioned occupational categories. All occupation categories were significantly associated with MetS ( $p < 0.001$ ). Among the occupations, taxi driving had the highest MetS prevalence rate (e.g., 33.41% and 60.71% for male and female, respectively) even though the number of female taxi driving was only 44, which was much higher than the average prevalence rate (28.16% and 10.92% for male and female, respectively) in the unstratified data. The occupational categories with the second and the third highest MetS prevalence of males were Managerial-3 and Sales-4 at 32.52%, and 29.53%, respectively. On the other hand, the second and the third highest MetS prevalence of females were Manual Labor-7 and Managerial-3 at 18.97%, and 12.41%, respectively.

**Table 4** Comparison of MetS characteristics of male

| Variables               | Total |       | Without<br>(n=31,454) |      | With<br>(n=12,328) |       | p-value |
|-------------------------|-------|-------|-----------------------|------|--------------------|-------|---------|
|                         | Mean  | SD    | Mean                  | SD   | Mean               | SD    |         |
| Weight(Kg)              | 72.8  | 11.3  | 69.7                  | 9.3  | 80.9               | 12.1  | <0.001  |
| SBP(mmHg)               | 120.6 | 15.0  | 116.8                 | 13.0 | 130.3              | 15.4  | <0.001  |
| DBP(mmHg)               | 77.4  | 10.5  | 74.8                  | 9.2  | 84.0               | 10.6  | <0.001  |
| WC(cm)                  | 84.1  | 8.7   | 81.2                  | 7.0  | 91.5               | (8.3) | <0.001  |
| Body Fat (%)            | 24.3  | 5.5   | 22.8                  | 4.8  | 28.0               | 5.3   | <0.001  |
| FPG(mg/dl)              | 103.2 | 18.7  | 99.5                  | 12.6 | 112.6              | 26.8  | <0.001  |
| TG(mg/dl)               | 136.8 | 103.5 | 113.6                 | 74.7 | 196.0              | 137.7 | <0.001  |
| CHOL                    | 197.5 | 34.2  | 195.4                 | 33.1 | 202.8              | 36.1  | <0.001  |
| HDL-C(mg/dl)            | 52.0  | 11.4  | 54.3                  | 11.3 | 46.0               | 9.3   | <0.001  |
| LDL-C(mg/dl)            | 124.8 | 32.1  | 122.9                 | 31.1 | 129.6              | 33.9  | <0.001  |
| BMI(Kg/m <sup>2</sup> ) | 24.8  | 3.4   | 23.7                  | 2.7  | 27.4               | 3.5   | <0.001  |

**Table 5** Comparison of MetS characteristics of female

| Variables                            | Total  |       | Without<br>(n=26,478) |       | With<br>(n=3,246) |       | p-value |
|--------------------------------------|--------|-------|-----------------------|-------|-------------------|-------|---------|
|                                      | Mean   | SD    | Mean                  | SD    | Mean              | SD    |         |
| Weight(Kg)                           | 55.78  | 9.35  | 54.32                 | 7.76  | 67.70             | 12.28 | <0.001  |
| SBP(mmHg)                            | 107.49 | 14.89 | 105.48                | 13.15 | 123.88            | 17.81 | <0.001  |
| DBP(mmHg)                            | 68.44  | 10.06 | 67.32                 | 9.22  | 77.65             | 11.76 | <0.001  |
| WC(cm)                               | 71.08  | 7.91  | 69.71                 | 6.49  | 82.22             | 9.52  | <0.001  |
| Body Fat (%)                         | 29.03  | 6.75  | 27.97                 | 5.83  | 37.76             | 7.44  | <0.001  |
| FPG(mg/dl)                           | 97.02  | 14.39 | 95.04                 | 9.38  | 113.20            | 29.78 | <0.001  |
| TG(mg/dl)                            | 86.99  | 58.01 | 78.01                 | 43.40 | 160.16            | 97.19 | <0.001  |
| CHOL                                 | 190.61 | 32.57 | 189.36                | 31.96 | 200.81            | 35.56 | <0.001  |
| HDL-C(mg/dl)                         | 65.33  | 14.78 | 67.12                 | 14.21 | 50.80             | 10.78 | <0.001  |
| LDL-C(mg/dl) <sup>3</sup>            | 109.23 | 29.83 | 107.12                | 28.84 | 126.33            | 32.18 | <0.001  |
| BMI(Kg/m <sup>2</sup> ) <sup>4</sup> | 22.03  | 3.48  | 21.43                 | 2.83  | 26.93             | 4.31  | <0.001  |

**Table 6** Comparisons of MetS characteristics of male stratified by age

| Variables               | Age≤40<br>(n=21,410) |                   |         | 40<Age≤60<br>(n=20,565) |                   |         | Age>60<br>(n=1,807) |                   |         |
|-------------------------|----------------------|-------------------|---------|-------------------------|-------------------|---------|---------------------|-------------------|---------|
|                         | Non Mets             |                   | p-value | Non MetS                |                   | p-value | Non MetS            |                   | p-value |
|                         | Mean (SD)            | Mets<br>Mean (SD) |         | Mean (SD)               | MetS<br>Mean (SD) |         | Mean (SD)           | MetS<br>Mean (SD) |         |
| Weight(Kg)              | 70.8(9.7)            | 85.1(12.5)        | <0.001  | 68.7(8.5)               | 78.6(11.0)        | <0.001  | 64.9(8.5)           | 73.5(9.6)         | <0.001  |
| SBP(mmHg)               | 115.9(11.7)          | 128.9(14.7)       | <0.001  | 117.1(13.7)             | 130.5(15.6)       | <0.001  | 125.8(17.2)         | 139.2(16.2)       | <0.001  |
| DBP(mmHg)               | 73.4(8.6)            | 82.4(10.6)        | <0.001  | 76.1(9.5)               | 85.0(10.5)        | <0.001  | 77.8(10.5)          | 85.0(10.0)        | <0.001  |
| WC(cm)                  | 80.8(7.2)            | 92.6(8.6)         | <0.001  | 81.6(6.7)               | 90.6(8.1)         | <0.001  | 83.0(7.4)           | 91.5(8.0)         | <0.001  |
| Body Fat (%)            | 23.3(5.0)            | 29.6(5.3)         | <0.001  | 22.3(4.5)               | 27.0(5.0)         | <0.001  | 21.3(4.8)           | 25.8(5.4)         | <0.001  |
| FPG(mg/dl)              | 97.8(9.3)            | 108.5(22.8)       | <0.001  | 101.2(14.7)             | 114.6(27.7)       | <0.001  | 103.3(21.0)         | 122.0(37.6)       | <0.001  |
| TG(mg/dl)               | 109.1(74.0)          | 198.9(148.4)      | <0.001  | 120.1(77.0)             | 196.0(132.2)      | <0.001  | 101.1(47.2)         | 173.7(103.5)      | <0.001  |
| CHOL                    | 192.1(32.8)          | 203.5(36.2)       | <0.001  | 199.6(33.0)             | 203.1(36.0)       | <0.001  | 192.0(34.0)         | 194.6(35.3)       | <0.001  |
| HDL-C(mg/dl)            | 54.4(11.2)           | 45.4(8.9)         | <0.001  | 54.2(11.3)              | 46.3(9.5)         | <0.001  | 55.3(11.8)          | 46.3(10.5)        | <0.001  |
| LDL-C(mg/dl)            | 120.6(31.1)          | 131.9(33.9)       | <0.001  | 125.8(30.9)             | 128.7(34.0)       | <0.001  | 120.2(31.3)         | 122.0(32.0)       | <0.001  |
| BMI(Kg/m <sup>2</sup> ) | 23.7(2.9)            | 28.2(3.7)         | <0.001  | 23.7(2.5)               | 27.0(3.2)         | <0.001  | 23.8(2.8)           | 26.6(3.3)         | <0.001  |

We analyzed the associations between major factors of the three age groups in a multiple logistic regression model in Table 10 to Table 12. BMI (%), body weight (kg), body fat per-

centage (%) and total cholesterol (mg/dL) were revealed to be the important risk factors for MetS ( $p < 0.01$  or even  $p < 0.001$ ). There are significant differences in gender between

**Table 7** Comparisons of MetS characteristics of female stratified by age

| Variables               | Age≤40<br>(n=15,972) |        |         | 40<Age≤60<br>(n=13,172) |        |         | Age>60<br>(n=580) |        |         |
|-------------------------|----------------------|--------|---------|-------------------------|--------|---------|-------------------|--------|---------|
|                         | Non Mets             | Mets   | p-value | Non MetS                | MetS   | p-value | Non MetS          | MetS   | p-value |
| Weight(Kg)              | 54.06                | 72.86  | <0.001  | 54.69                   | 65.80  | <0.001  | 63.56             | 64.47  | <0.001  |
| SBP(mmHg)               | 103.10               | 120.02 | <0.001  | 108.20                  | 125.09 | <0.001  | 53.50             | 61.22  | <0.001  |
| DBP(mmHg)               | 66.30                | 76.32  | <0.001  | 68.54                   | 78.43  | <0.001  | 118.69            | 131.14 | <0.001  |
| WC(cm)                  | 68.78                | 84.36  | <0.001  | 70.85                   | 81.28  | <0.001  | 71.42             | 76.18  | <0.001  |
| Body Fat (%)            | 27.51                | 40.42  | <0.001  | 28.54                   | 36.70  | <0.001  | 73.05             | 81.20  | <0.001  |
| FPG(mg/dl)              | 93.45                | 109.35 | <0.001  | 96.89                   | 114.45 | <0.001  | 29.12             | 35.18  | <0.001  |
| TG(mg/dl)               | 73.05                | 149.66 | <0.001  | 84.23                   | 165.27 | <0.001  | 91.55             | 159.60 | <0.001  |
| CHOL                    | 183.75               | 192.51 | <0.001  | 196.28                  | 203.75 | <0.001  | 207.74            | 212.53 | 0.1437  |
| HDL-C(mg/dl)            | 67.05                | 49.48  | <0.001  | 67.18                   | 51.13  | <0.001  | 67.84             | 54.21  | <0.001  |
| LDL-C(mg/dl)            | 102.60               | 123.23 | <0.001  | 112.66                  | 127.47 | <0.001  | 121.36            | 129.99 | 0.0047  |
| BMI(Kg/m <sup>2</sup> ) | 21.08                | 28.26  | <0.001  | 21.87                   | 26.39  | <0.001  | 22.49             | 25.71  | <0.001  |

**Table 8** Chi-square test results of categorical variables for characteristics as well as MetS criteria variables of male

| Variables  | Item                          | Non-MetS |       | MetS  |       | p-value |
|------------|-------------------------------|----------|-------|-------|-------|---------|
|            |                               | n        | (%)   | n     | (%)   |         |
| Age        | Age≤40                        | 16,483   | 76.99 | 4,927 | 23.01 | <0.001  |
|            | 40<Age≤60                     | 13,813   | 67.17 | 6,752 | 32.83 |         |
|            | Age>60                        | 1,158    | 64.08 | 649   | 35.92 |         |
| Occupation | Professional-1                | 1,936    | 74.18 | 674   | 25.82 | <0.001  |
|            | Technical-2                   | 12,603   | 74.5  | 4,314 | 25.5  |         |
|            | Managerial-3                  | 5,704    | 67.48 | 2,749 | 32.52 |         |
|            | Sales-4                       | 4,516    | 70.47 | 1,892 | 29.53 |         |
|            | Service-5                     | 1,557    | 71.32 | 626   | 28.68 |         |
|            | Clerical and Administrative-6 | 1,558    | 73.94 | 549   | 26.06 |         |
|            | Manual Labor-7                | 2,127    | 72.79 | 795   | 27.21 |         |
|            | Taxi Driver-8                 | 1,453    | 66.59 | 729   | 33.41 |         |

**Table 9** Chi-square test results of categorical variables for characteristics as well as MetS criteria variables of female

| Variables  | Item                          | Non-MetS |       | MetS  |       | p-value |
|------------|-------------------------------|----------|-------|-------|-------|---------|
|            |                               | n        | (%)   | n     | (%)   |         |
| Age        | Age≤40                        | 14,977   | 93.77 | 995   | 6.23  | <0.001  |
|            | 40<Age≤60                     | 11,107   | 84.32 | 2,065 | 15.68 |         |
|            | Age>60                        | 394      | 67.93 | 186   | 32.07 |         |
| Occupation | Professional-1                | 3,410    | 91.23 | 328   | 8.77  | <0.001  |
|            | Technical-2                   | 2,313    | 91.06 | 227   | 8.94  |         |
|            | Managerial-3                  | 2,809    | 87.59 | 398   | 12.41 |         |
|            | Sales-4                       | 4,738    | 89.87 | 534   | 10.13 |         |
|            | Service-5                     | 2,655    | 88.15 | 357   | 11.85 |         |
|            | Clerical and Administrative-6 | 9,334    | 89.81 | 1,059 | 10.19 |         |
|            | Manual Labor-7                | 1,175    | 81.03 | 275   | 18.97 |         |
|            | Taxi Driver-8                 | 44       | 39.29 | 68    | 60.71 |         |

the young and middle-aged groups. That is, male runs a higher risk to have MetS. However, there is no difference between the male and female when age > 60.

As for the three occupational groups that the eight occupational categories fell under in Table 10, the non-sedentary-related occupations in Group-II significantly have less preva-

1  
2  
3  
4  
5  
6  
7  
8  
9  
10  
11  
12  
13  
14  
15  
16  
17  
18  
19  
20  
21  
22  
23  
24  
25  
26  
27  
28  
29  
30  
31  
32  
33  
34  
35  
36  
37  
38  
39  
40  
41  
42  
43  
44  
45  
46  
47  
48  
49  
50  
51  
52  
53  
54  
55  
56  
57  
58  
59  
60

lence rate of MetS (OR = 0.88, CI: 0.78-0.99,  $p = 0.0295$ ) than the other groups if age  $\leq 40$ . There is no difference among the three occupation groups in the middle age group. The proportion of men with MetS is still significantly higher than that of women by the age 60. Finally, those in group-III (i.e., sedentary-related occupations with high-SES) occupations were likely to develop MetS (OR = 1.39, CI: 1.04-1.85,  $p = 0.0247$ ) compared with the two other groups if age  $> 60$ . There is no difference between male and female in terms of the MetS prevalence.

## DISCUSSION

Owen et al. [24] reported that the average person spends (1) 71% of their daily waking hours in an inactive state and (2) only 30 min daily on moderate-intensity physical activity on most days of a week. As noted in the literature review in the introduction section, MetS likelihood significantly increases with sedentary time, and sedentary behavior [24, 39, 40]. Being sedentary also makes one significantly more likely to be obese [9], have poor cardiometabolic health [17, 32], and have poor cognitive health [26]. An increasing number of researchers are beginning to investigate the correlation of a sedentary occupation with MetS or CVD risk [9, 25, 26, 27, 29, 30].

However, most MetS risk factors have focused on lack of physical activity rather than sedentary occupation. These studies have noted that spending more time being passive increases metabolic risk [41, 42]. Recent research has also demonstrated that lifestyle and SES are significant risk factors for MetS [21, 22] and CVD [21, 43, 44]. Nonetheless, Kim et al. [45] argued that a causal relationship of SES with MetS and CVD risks—as indicated by the Framingham risk score—cannot be established by the current body of cross-sectional evidence. Furthermore, scholars have yet to investigate the role of occupation in MetS risk, with occupation further distinguished by sedentary status and SES associations. In particular, MetS risk is likely to differ between those working in typically sedentary white-collar occupations (such as doctors, professors, managers, and engineers) and those working in sedentary blue-collar occupations (such as administrative staff, service staff, and even taxi drivers).

We confirmed the importance of age and occupations as MetS risk factors for males and females in Table 8 and Table 9, respectively. Both aspects significantly influence the prevalence rate of MetS. We further stratified the cases into three age groups and eight occupation groups. Regarding the eight occupations, both Manager-3 and Taxi Driver-8 consistently get MetS for males and females. However, Sales-4 of males came to third place, represented a high prevalence rate

even though they belong to the non-sedentary group. It might be interesting for future research to discover the risk factor for Sales-4. According to Table 8 and Table 9, the prevalence rate of female is low when age is less than and equal to 60. However, the prevalence rate of female is increased dramatically to 32.07% when age is above 60. This result was due to the female hormones was reduced when they step into the menopause [46]. Hence, the difference in the prevalence rate between males and females is not many.

Due to the age group influencing the highest prevalence of MetS, this study compared the three occupation categories under different age groups. In Table 10, we found the non-sedentary occupation group has less chance to have MetS. In Table 11, there is no difference among the three occupational groups which implies occupational effects might not be the key factor for MetS. However, high-SES-associated occupations of the older age group are at a higher risk of MetS than general sedentary and non-sedentary occupations shown in Table 12. Hence, the people who are belonged this sedentary and high-SES occupations should avoid prolonged sitting all day long. In addition, there is no difference between the male and female due to MetS was more prevalent among postmenopausal female [46].

## CONCLUSIONS

Although prolonged sitting is an ostensibly novel risk factor for health outcomes across all ages, its association must be replicated in occupational conditions [32]. In this study, we noted that age and occupation categories were risk factors for MetS. The study found that lawyer, teacher, accountant, doctor, nurse, engineer, manager, and taxi driver, were high-risk groups for MetS. After the eight categories were grouped into three groups when the age is under 40, the non-sedentary occupation groups yield less prevalence rate than those in the general sedentary, and sedentary and high-SES occupations. Besides, when the age is above 60, there is a significant difference. The sedentary and high-SES occupations (group-III) are likely to have MetS than the general sedentary occupations (group-I) and non-sedentary occupations (group-II). We recommend for government authorities to focus on sedentary high-SES workers in their policies, particularly in tailoring health promotion programs to these groups, such as aerobic exercise [47] or physical activities [28, 48].

## ACKNOWLEDGEMENTS

We thank the Ministry of Science and Technology for supporting this research (grant numbers: MOST-107-2221-E-161-002 and MOST-108-2221-E-161-003-MY2). We also thank the

**Table 10** Multiple logistic regression results for risk-factor associations when  $if \leq 40$ 

| Variables                | Condition   | OR   | 95%CI |      | p-value |
|--------------------------|-------------|------|-------|------|---------|
| Occupation               | Group-I*    | 1.00 |       |      |         |
|                          | Group-II †  | 0.88 | 0.78  | 0.99 | 0.0295  |
|                          | Group-III ‡ | 1.03 | 0.95  | 1.12 | 0.4825  |
| Gender                   | Male        | 1.00 |       |      |         |
|                          | Female      | 0.43 | 0.37  | 0.51 | <0.001  |
| Weight(Kg)               |             | 1.04 | 1.03  | 1.05 | <0.001  |
| BMI                      |             | 1.26 | 1.22  | 1.29 | <0.001  |
| Body Fat Percentage(%)   |             | 1.07 | 1.06  | 1.08 | <0.001  |
| LDL-C(mg/dl)             |             | 1.00 | 1.00  | 1.01 | 0.0012  |
| Total Cholesterol(mg/dl) |             | 1.00 | 1.00  | 1.00 | 0.0406  |

\*Group-I: General sedentary-related occupations

†Group-II: non sedentary-related occupations ‡Group-

III: sedentary-related occupations with high-SES

**Table 11** Multiple logistic regression results for risk-factor associations when  $40 < \text{age} \leq 60$ 

| Variables                | Condition | OR   | 95%CI |      | p-value |
|--------------------------|-----------|------|-------|------|---------|
| Occupation               | Group-I   | 1.00 |       |      |         |
|                          | Group-II  | 1.01 | 0.93  | 1.10 | 0.8170  |
|                          | Group-III | 0.98 | 0.91  | 1.05 | 0.5618  |
| Gender                   | Male      | 1.00 |       |      |         |
|                          | Female    | 0.46 | 0.40  | 0.52 | <0.001  |
| Weight(Kg)               |           | 1.03 | 1.02  | 1.03 | <0.001  |
| BMI                      |           | 1.30 | 1.27  | 1.33 | <0.001  |
| Body Fat Percentage(%)   |           | 1.07 | 1.06  | 1.08 | <0.001  |
| LDL-C(mg/dl)             |           | 1.00 | 1.00  | 1.00 | 0.2922  |
| Total Cholesterol(mg/dl) |           | 1.00 | 1.00  | 1.00 | <0.001  |

**Table 12** Multiple logistic regression results for risk-factor associations when  $\text{age} > 60$ 

| Variables                | Condition | OR   | 95%CI |      | p-value |
|--------------------------|-----------|------|-------|------|---------|
| Occupation               | Group-I   | 1.00 |       |      |         |
|                          | Group-II  | 1.16 | 0.89  | 1.53 | 0.2708  |
|                          | Group-III | 1.39 | 1.04  | 1.85 | 0.0247  |
| Gender                   | Male      | 1.00 |       |      |         |
|                          | Female    | 0.99 | 0.65  | 1.50 | 0.9657  |
| Weight(Kg)               |           | 1.06 | 1.04  | 1.08 | <0.001  |
| BMI                      |           | 1.10 | 1.03  | 1.18 | 0.0059  |
| Body Fat Percentage(%)   |           | 1.08 | 1.05  | 1.11 | <0.001  |
| LDL-C(mg/dl)             |           | 1.00 | 0.99  | 1.00 | 0.1646  |
| Total Cholesterol(mg/dl) |           | 1.00 | 1.00  | 1.01 | 0.1900  |

Far Eastern Memorial Hospital for their support (grant number: NSC-RD-106-1-12-504). The authors would like to express their thanks for the aid rendered by Dr. Yen-Ling Chiu (Nephrologist) and Dr. Yen-Wen Wu (Cardiologist) of Far

Eastern Memorial Hospital.



## FOOTNOTES

### Contributors

M.-S.C. (Ming-Shu Chen) conceived and designed the experiments; M.-S.C. and C.-H.C. (Chi-Hao Chiu) performed the experiments; C.-H.C., and S.-H.C. (Shih-Hsin Chen) analyzed the data; M.-S.C. were supervised the study; M.-S.C. contributed investigation material; M.-S.C., C.-H.C., and S.-H.C. wrote this paper together. S.-H.C. submitted this paper.

### Funding

This research was funded by a grant from the Ministry of Science and Technology in Taiwan (grant numbers: MOST-107-2221-E-161-002 & MOST-108-2221-E-161-003-MY2), and a funding from Far Eastern Memorial Hospital (ID: NSC-RD-106-1-12-504). The authors declare no conflict of interest. The founding sponsors had no role in the design of the study; in the collection, analyses, or interpretation of data; in the writing of the manuscript; or in the decision to publish the results.

## COMPETING INTERESTS

The authors declare no conflicts of interest concerning this study.

### Ethics approval

Ethical approval was obtained from the Research Ethics Review Committee at the Far Eastern Memorial Hospital in New Taipei City, Taiwan (Institutional Review Board approval number: FEMH-IRB-107126-E, v.02; board meeting and approval date: September 10, 2018). The MJ Health Research Foundation also approved this study. This study also has a PPS receipt (ClinicalTrials.gov ID: NCT04142593, Date: October 25, 2019)

### Data sharing statement

We aggregate two databases from New Taipei City Government Annual Taxi Health Examination Survey by Far Eastern Memorial Hospital (FEMH), and the the MJ Health Check-Up–Based Population Database (MJPD) (2012–2016). The first dataset used in this study was restricted by the Research Ethics Review Committee of the Far Eastern Memorial Hospital (FEMH-IRB-107126-E, v.02) in order to protect participant privacy. The second dataset, MJPD, is accessible to researchers upon request. Please contact Dr. Ming-Shu Chen (email: tree1013@gmail.com) to obtain further information.

### Consent to patient and public involvement statement

No patient involved.

## REFERENCES

- 1 R Bethene Ervin. Prevalence of metabolic syndrome among adults 20 years of age and over, by sex, age, race and ethnicity, and body mass index: United states. *National health statistics reports*, 13:1–8, 2009.
- 2 Lee-Ching Hwang, Chyi-Huey Bai, and Chien-Jen Chen. Prevalence of obesity and metabolic syndrome in taiwan. *Journal of the Formosan Medical Association*, 105(8):626–635, 2006.
- 3 Apilak Worachartcheewan, Chanin Nantasenamat, Chartchalerm Isarankura-Na-Ayudhya, Phannee Pidetcha, and Virapong Prachayasittikul. Identification of metabolic syndrome using decision tree analysis. *Diabetes Research and Clinical Practice*, 90(1):e15–e18, 2010.
- 4 Yuan Ching, Yit Chin, Mahenderan Appukutty, Wan Gan, Vasudevan Ramanchadran, and Yoke Chan. Prevalence of metabolic syndrome and its associated factors among vegetarians in malaysia. *International journal of environmental research and public health*, 15(9):2031, 2018.
- 5 SuJin Song, Hee Young Paik, Won O Song, and YoonJu Song. Metabolic syndrome risk factors are associated with white rice intake in korean adolescent girls and boys. *British Journal of Nutrition*, 113(3):479–487, 2015.
- 6 Hideo Matsuura, Kanae Mure, Nobuhiro Nishio, Naomi Kitano, Naoko Nagai, and Tatsuya Takeshita. Relationship between coffee consumption and prevalence of metabolic syndrome among japanese civil servants. *Journal of epidemiology*, 22(2):160–166, 2012.
- 7 Ming-Shu Chen and Shih-Hsin Chen. A data-driven assessment of the metabolic syndrome criteria for adult health management in taiwan. *International journal of environmental research and public health*, 16(1):92, 2019.
- 8 Xinghua Yang, Qiushan Tao, Feng Sun, and Siyan Zhan. The impact of socioeconomic status on the incidence of metabolic syndrome in a taiwanese health screening population. *International Journal of Public Health*, 57(3):551–559, 2012.
- 9 Markus Strauß, Peter Foshag, Bianca Przybyłek, Marc Horlitz, Alejandro Lucia, Fabian Sanchis-Gomar, and Roman Leischik. Occupation and metabolic syndrome: is

- there correlation? a cross sectional study in different work activity occupations of german firefighters and office workers. *Diabetology & metabolic syndrome*, 8(1):57, 2016.
- 10 Enzo Bonora, Stefan Kiechl, Johann Willeit, Friedrich Oberhollenzer, Georg Egger, Riccardo C Bonadonna, and Michele Muggeo. Carotid atherosclerosis and coronary heart disease in the metabolic syndrome: prospective data from the bruneck study. *Diabetes care*, 26(4):1251–1257, 2003.
- 11 Joseph Henson, David W Dunstan, Melanie J Davies, and Thomas Yates. Sedentary behaviour as a new behavioural target in the prevention and treatment of type 2 diabetes. *Diabetes/metabolism research and reviews*, 32(S1):213–220, 2016.
- 12 Robert L Hanson, Giuseppina Imperatore, Peter H Bennett, and William C Knowler. Components of the “metabolic syndrome” and incidence of type 2 diabetes. *Diabetes*, 51(10):3120–3127, 2002.
- 13 Peter WF Wilson, Ralph B D’Agostino, Helen Parise, Lisa Sullivan, and James B Meigs. Metabolic syndrome as a precursor of cardiovascular disease and type 2 diabetes mellitus. *Circulation*, 112(20):3066–3072, 2005.
- 14 BO Isomaa, Peter Almgren, Tiinamaija Tuomi, Björn Forsén, Kaj Lahti, Michael Nissén, Marja-Riitta Taskinen, and Leif Groop. Cardiovascular morbidity and mortality associated with the metabolic syndrome. *Diabetes care*, 24(4):683–689, 2001.
- 15 Ann Marie McNeill, Ronit Katz, Cynthia J Girman, Wayne D Rosamond, Lynne E Wagenknecht, Joshua I Barzilay, Russell P Tracy, Peter J Savage, and Sharon A Jackson. Metabolic syndrome and cardiovascular disease in older people: the cardiovascular health study. *Journal of the American Geriatrics Society*, 54(9):1317–1324, 2006.
- 16 MusaSaulawaIbrahim, DongPang, GurchRandhawa, and Yannis Pappas. Risk models and scores for metabolic syndrome: systematic review protocol. *BMJ open*, 9(9):e027326, 2019.
- 17 Kishan Bakrania, Charlotte L Edwardson, Danielle H Bodicoat, Dale W Esliger, Jason MR Gill, Aadil Kazi, Latha Velayudhan, Alan J Sinclair, Naveed Sattar, Stuart JH Biddle, et al. Associations of mutually exclusive categories of physical activity and sedentary time with markers of cardiometabolic health in english adults: a cross-sectional analysis of the health survey for england. *BMC public health*, 16(1):25, 2016.
- 18 Salvatore Carbone, Danielle L Kirkman, Ryan S Garten, Paula Rodriguez-Miguelez, Enrique G Artero, Duck-chul Lee, and Carl J Lavie. Muscular strength and cardiovascular disease: an updated state-of-the-art narrative review. *Journal of Cardiopulmonary Rehabilitation and Prevention*, 40(5):302–309, 2020.
- 19 Jason Brocato, Fen Wu, Yu Chen, Magdy Shamy, Mansour A Alghamdi, Mamdouh I Khoder, Alser A Alkhatim, Mamdouh H Abdou, and Max Costa. Association between sleeping hours and cardiometabolic risk factors for metabolic syndrome in a saudi arabian population. *BMJ open*, 5(11), 2015.
- 20 Jui Hua Huang, Ren Hau Li, Shu Ling Huang, Hon Ke Sia, Yu Ling Chen, and Feng Cheng Tang. Lifestyle factors and metabolic syndrome among workers: The role of interactions between smoking and alcohol to nutrition and exercise. *International Journal of Environmental Research Public Health*, 12(12):15967–15978, 2015.
- 21 Chen-Mao Liao and Chih-Ming Lin. Life course effects of socioeconomic and lifestyle factors on metabolic syndrome and 10-year risk of cardiovascular disease: A longitudinal study in taiwan adults. *International Journal of Environmental Research and Public Health*, 15(10):2178, 2018.
- 22 R Mehrdad, G Pouryaghoub, and M Moradi. Association between metabolic syndrome and job rank. *Int J Occup Environ Med*, 9(1):45–51, 2018.
- 23 Andrea Bankoski, Tamara B Harris, James J McClain, Robert J Brychta, Paolo Caserotti, Kong Y Chen, David Berrigan, Richard P Troiano, and Annemarie Koster. Sedentary activity associated with metabolic syndrome independent of physical activity. *Diabetes care*, 34(2):497–503, 2011.
- 24 Neville Owen, Geneviève N Healy, Charles E Matthews, and David W Dunstan. Too much sitting: the population-health science of sedentary behavior. *Exercise and sport sciences reviews*, 38(3):105, 2010.
- 25 Maria Aguilar, Taft Bhuket, Sharon Torres, Benny Liu, and Robert J Wong. Prevalence of the metabolic syndrome in the united states, 2003-2012. *Jama*, 313(19):1973–1974, 2015.
- 26 Kishan Bakrania, Charlotte L Edwardson, Kamlesh Khunti, StephanBandelow, MelanieJDavies, andThomas Yates. Associations between sedentary behaviours and

- cognitive function: cross-sectional and prospective findings from the uk biobank. *American Journal of Epidemiology*, 2017.
- 27 Duk Cho and Jung-Wan Koo. Differences in metabolic syndrome prevalence by employment type and sex. *International journal of environmental research and public health*, 15(9):1798, 2018.
- 28 Carl J Lavie, Cemal Ozemek, Salvatore Carbone, Peter T Katzmarzyk, and Steven N Blair. Sedentary behavior, exercise, and cardiovascular health. *Circulation research*, 124(5):799–815, 2019.
- 29 Asuka Sakuraya, Kazuhiro Watanabe, Norito Kawakami, Kotaro Imamura, Emiko Ando, Yumi Asai, Hisashi Eguchi, Yuka Kobayashi, Norimitsu Nishida, Hideaki Arima, et al. Work-related psychosocial factors and onset of metabolic syndrome among workers: a systematic review and meta-analysis protocol. *BMJ open*, 7(6):e016716, 2017.
- 30 Seung Yong Shin, Chul Gab Lee, Han Soo Song, Sul Ha Kim, Hyun Seung Lee, Min Soo Jung, and Sang Kon Yoo. Cardiovascular disease risk of bus drivers in a city of korea. *Annals of occupational and environmental medicine*, 25(1):34, 2013.
- 31 Roman Leischik, Peter Foshag, Markus Strauß, Henning Littwitz, Pankaj Garg, Birgit Dworrak, and Marc Horlitz. Aerobic capacity, physical activity and metabolic risk factors in firefighters compared with police officers and sedentary clerks. *PloS one*, 10(7):e0133113, 2015.
- 32 Chutima Jalayondeja, Wattana Jalayondeja, Keerin Mekhora, Petcharatana Bhuanantanondh, Asadang Dusadi-Isariyavong, and Rujiret Upiriyasakul. Break in sedentary behavior reduces the risk of noncommunicable diseases and cardiometabolic risk factors among workers in a petroleum company. *International journal of environmental research and public health*, 14(5):501, 2017.
- 33 Markus Strauss, Peter Foshag, and Roman Leischik. Prospective evaluation of cardiovascular, cardiorespiratory, and metabolic risk of german office workers in comparison to international data. *International journal of environmental research and public health*, 17(5):1590, 2020.
- 34 Mohamed Hamad Al-Thani, Sohaila Cheema, Javaid Sheikh, Ravinder Mamtani, Albert B Lowenfels, Walaa Fattah Al-Chetachi, Badria Ali Almalki, Shamseldin Ali Hassan Khalifa, Ahmad Omar Haj Bakri, Patrick Maisonneuve, et al. Prevalence and determinants of metabolic syndrome in qatar: results from a national health survey. *BMJ open*, 6(9), 2016.
- 35 Anne Kouvonen, Mika Kivimäki, Marko Elovainio, Jaana Pentti, Anne Linna, Marianna Virtanen, and Jussi Vahtera. Effort/reward imbalance and sedentary lifestyle: an observational study in a large occupational cohort. *Occupational and environmental medicine*, 63(6):422–427, 2006.
- 36 R Leischik, B Dworrak, M Strauss, B Przybyłek, D Schöne, M Horlitz, A Mügge, and T Dworrak. Plasticity of health. *German Journal of Medicine*, 1:1–17, 2016.
- 37 Pamela S Cain and Donald J Treiman. The dictionary of occupational titles as a source of occupational data. *American Sociological Review*, pages 253–278, 1981.
- 38 Proper K. I. Hildebrandt V. H. Jans, M. P. Sedentary behavior in dutch workers: differences between occupations and business sectors. *American journal of preventive medicine*, 33(6):450–454, 2007.
- 39 Earl S Ford, Harold W Kohl, Ali H Mokdad, and Umed A Ajani. Sedentary behavior, physical activity, and the metabolic syndrome among us adults. *Obesity*, 13(3):608–614, 2005.
- 40 Katrien Wijndaele, N Duvigneaud, Lynn Matton, William Duquet, Christophe Delecluse, Martine Thomis, Gaston Beunen, Johan Lefevre, and RM Philippaerts. Sedentary behaviour, physical activity and a continuous metabolic syndromeriskscoreinadults. *Europeanjournalofclinical nutrition*, 63(3):421, 2009.
- 41 Genevieve N Healy, Katrien Wijndaele, David W Dunstan, Jonathan E Shaw, Jo Salmon, Paul Z Zimmet, and Neville Owen. Objectively measured sedentary time, physical activity, and metabolic risk. *Diabetes care*, 31(2):369–371, 2008.
- 42 RJ Shephard. Breaks in sedentary time: Beneficial associations with metabolic risk healy gn, dunstan dw, salmon j, et al (the univ of queensland, brisbane, australia; the international diabetes inst, melbourne, australia; deakin univ, melbourne, australia; et al) diabetes care 31: 661-666, 2008. *Year Book of Sports Medicine*, 2010:183–185, 2010.
- 43 Eric B Loucks, David H Rehkopf, Rebecca C Thurston, and Ichiro Kawachi. Socioeconomic disparities in metabolic syndrome differ by gender: evidence from nhanes iii. *Annals of epidemiology*, 17(1):19–26, 2007.

- 1  
2  
3 44 Sunmi Yoo, Hong-Jun Cho, and Young-Ho Khang.  
4 General and abdominal obesity in south korea, 1998–  
5 2007: gender and socioeconomic differences. *Preventive*  
6 *medicine*, 51(6):460–465, 2010.  
7  
8 45 Ji Young Kim, Sung Hi Kim, and Yoon Jeong Cho. So-  
9 cioeconomic status in association with metabolic syn-  
10 drome and coronary heart disease risk. *Korean journal*  
11 *of family medicine*, 34(2):131, 2013.  
12  
13 46 Ricardo de Marchi, Cátia Millene Dell’Agnolo, Tiara  
14 Cristina Romeiro Lopes, Angela Andréia França Gravena,  
15 Marcela de Oliveira Demitto, Sheila Cristina Rocha  
16 Brischiliari, Deise Helena Pelloso Borghesan, Maria  
17 Dalva de Barros Carvalho, and Sandra Marisa Pel-  
18 loso. Prevalence of metabolic syndrome in pre-and post-  
19 menopausal women. *Archives of Endocrinology and*  
20 *Metabolism*, 61(2):160–166, 2017.  
21  
22 47 Esmée A Bakker, Duck-chul Lee, Xuemei Sui, Enrique G  
23 Artero, JonatanRRuiz, ThijsMHEijsvogels, CarlJLlavie,  
24 and Steven N Blair. Association of resistance exercise,  
25 independent of and combined with aerobic exercise, with  
26 the incidence of metabolic syndrome. In *Mayo Clinic Pro-*  
27 *ceedings*, volume 92, pages 1214–1222. Elsevier, 2017.  
28  
29 48 Gerald F Fletcher, Carolyn Landolfo, Josef Niebauer, Ce-  
30 mal Ozemek, Ross Arena, and Carl J Lavie. Promot-  
31 ing physical activity and exercise: Jacc health promotion  
32 series. *Journal of the American College of Cardiology*,  
33 72(14):1622–1639, 2018.  
34  
35  
36  
37  
38  
39  
40  
41  
42  
43  
44  
45  
46  
47  
48  
49  
50  
51  
52  
53  
54  
55  
56  
57  
58  
59  
60

STROBE Statement—Checklist of items that should be included in reports of *case-control studies*

| Item                         | No  | Recommendation                                                                                                                                                                                    | Page No      |
|------------------------------|-----|---------------------------------------------------------------------------------------------------------------------------------------------------------------------------------------------------|--------------|
| <b>Title and abstract</b>    | 1   | (a) Indicate the study's design with a commonly used term in the title or the abstract                                                                                                            | Page 1       |
|                              |     | (b) Provide in the abstract an informative and balanced summary of what was done and what was found                                                                                               | Page 1       |
| <b>Introduction</b>          |     |                                                                                                                                                                                                   |              |
| Background/rationale         | 2   | Explain the scientific background and rationale for the investigation being reported                                                                                                              | Page 1-2     |
| Objectives                   | 3   | State specific objectives, including any prespecified hypotheses                                                                                                                                  | Page 1-2     |
| <b>Methods</b>               |     |                                                                                                                                                                                                   |              |
| Study design                 | 4   | Present key elements of study design early in the paper                                                                                                                                           | Page 2-3     |
| Setting                      | 5   | Describe the setting, locations, and relevant dates, including periods of recruitment, exposure, follow-up, and data collection                                                                   | Page 2-3     |
| Participants                 | 6   | (a) Give the eligibility criteria, and the sources and methods of case ascertainment and control selection. Give the rationale for the choice of cases and controls                               | Page 3       |
|                              |     | (b) For matched studies, give matching criteria and the number of controls per case                                                                                                               | Page 2-3     |
| Variables                    | 7   | Clearly define all outcomes, exposures, predictors, potential confounders, and effect modifiers. Give diagnostic criteria, if applicable                                                          | NA           |
| Data sources/<br>measurement | 8*  | For each variable of interest, give sources of data and details of methods of assessment (measurement). Describe comparability of assessment methods if there is more than one group              | Page 2-3     |
| Bias                         | 9   | Describe any efforts to address potential sources of bias                                                                                                                                         | Page 1 and 7 |
| Study size                   | 10  | Explain how the study size was arrived at                                                                                                                                                         | NA           |
| Quantitative variables       | 11  | Explain how quantitative variables were handled in the analyses. If applicable, describe which groupings were chosen and why                                                                      | Page 3       |
| Statistical methods          | 12  | (a) Describe all statistical methods, including those used to control for confounding                                                                                                             | Page 2-3     |
|                              |     | (b) Describe any methods used to examine subgroups and interactions                                                                                                                               | Page 2-3     |
|                              |     | (c) Explain how missing data were addressed                                                                                                                                                       | Page 2-3     |
|                              |     | (d) If applicable, explain how matching of cases and controls was addressed                                                                                                                       | Page 2-3     |
|                              |     | (e) Describe any sensitivity analyses                                                                                                                                                             | Page 2-3     |
| <b>Results</b>               |     |                                                                                                                                                                                                   |              |
| Participants                 | 13* | (a) Report numbers of individuals at each stage of study—eg numbers potentially eligible, examined for eligibility, confirmed eligible, included in the study, completing follow-up, and analysed | Page 4-7     |
|                              |     | (b) Give reasons for non-participation at each stage                                                                                                                                              | Page 4-7     |
|                              |     | (c) Consider use of a flow diagram                                                                                                                                                                | Page 4-7     |
| Descriptive data             | 14* | (a) Give characteristics of study participants (eg demographic, clinical, social) and information on exposures and potential confounders                                                          | Page 4-7     |

|                          |     |                                                                                                                                                                                                              |                     |
|--------------------------|-----|--------------------------------------------------------------------------------------------------------------------------------------------------------------------------------------------------------------|---------------------|
|                          |     | (b) Indicate number of participants with missing data for each variable of interest                                                                                                                          | Page 4-7            |
| Outcome data             | 15* | Report numbers in each exposure category, or summary measures of exposure                                                                                                                                    | Page 4-7            |
| Main results             | 16  | (a) Give unadjusted estimates and, if applicable, confounder-adjusted estimates and their precision (eg, 95% confidence interval). Make clear which confounders were adjusted for and why they were included | Table 4-9           |
|                          |     | (b) Report category boundaries when continuous variables were categorized                                                                                                                                    | Table 4-9           |
|                          |     | (c) If relevant, consider translating estimates of relative risk into absolute risk for a meaningful time period                                                                                             | Table 4-9           |
| Other analyses           | 17  | Report other analyses done—eg analyses of subgroups and interactions, and sensitivity analyses                                                                                                               | Page 4-7            |
| <b>Discussion</b>        |     |                                                                                                                                                                                                              |                     |
| Key results              | 18  | Summarise key results with reference to study objectives                                                                                                                                                     | Page 1 and Page 7-8 |
| Limitations              | 19  | Discuss limitations of the study, taking into account sources of potential bias or imprecision. Discuss both direction and magnitude of any potential bias                                                   | Page 1 and 7        |
| Interpretation           | 20  | Give a cautious overall interpretation of results considering objectives, limitations, multiplicity of analyses, results from similar studies, and other relevant evidence                                   | Page 1 and 7        |
| Generalisability         | 21  | Discuss the generalisability (external validity) of the study results                                                                                                                                        | Page 7-8            |
| <b>Other information</b> |     |                                                                                                                                                                                                              |                     |
| Funding                  | 22  | Give the source of funding and the role of the funders for the present study and, if applicable, for the original study on which the present article is based                                                | Page 8              |

\*Give information separately for cases and controls.

**Responding: This study is not a typical “case-control studies” and research design, we only on the major study subjects to select the appropriate study objects to compare in this study.**

**Note:** An Explanation and Elaboration article discusses each checklist item and gives methodological background and published examples of transparent reporting. The STROBE checklist is best used in conjunction with this article (freely available on the Web sites of PLoS Medicine at <http://www.plosmedicine.org/>, Annals of Internal Medicine at <http://www.annals.org/>, and Epidemiology at <http://www.epidem.com/>). Information on the STROBE Initiative is available at <http://www.strobe-statement.org>.

# BMJ Open

## Risk assessment of metabolic syndrome prevalence involving sedentary occupations and socioeconomic status

|                                 |                                                                                                                                                                                                                                                                    |
|---------------------------------|--------------------------------------------------------------------------------------------------------------------------------------------------------------------------------------------------------------------------------------------------------------------|
| Journal:                        | <i>BMJ Open</i>                                                                                                                                                                                                                                                    |
| Manuscript ID                   | bmjopen-2020-042802.R4                                                                                                                                                                                                                                             |
| Article Type:                   | Original research                                                                                                                                                                                                                                                  |
| Date Submitted by the Author:   | 14-Oct-2021                                                                                                                                                                                                                                                        |
| Complete List of Authors:       | Chen, Ming-Shu; Asia Eastern University of Science and Technology, Department of Healthcare Administration<br>Chiu, Chi-Hao; Far Eastern Memorial Hospital, Medical Affairs<br>Chen, Shih-Hsin; Tamkang University, Department of Computer Science and Information |
| <b>Primary Subject Heading</b>: | Occupational and environmental medicine                                                                                                                                                                                                                            |
| Secondary Subject Heading:      | Health informatics                                                                                                                                                                                                                                                 |
| Keywords:                       | Other metabolic, e.g. iron, porphyria < DIABETES & ENDOCRINOLOGY, Health policy < HEALTH SERVICES ADMINISTRATION & MANAGEMENT, Risk management < HEALTH SERVICES ADMINISTRATION & MANAGEMENT, PUBLIC HEALTH, Health informatics < BIOTECHNOLOGY & BIOINFORMATICS   |
|                                 |                                                                                                                                                                                                                                                                    |

SCHOLARONE™  
Manuscripts



I, the Submitting Author has the right to grant and does grant on behalf of all authors of the Work (as defined in the below author licence), an exclusive licence and/or a non-exclusive licence for contributions from authors who are: i) UK Crown employees; ii) where BMJ has agreed a CC-BY licence shall apply, and/or iii) in accordance with the terms applicable for US Federal Government officers or employees acting as part of their official duties; on a worldwide, perpetual, irrevocable, royalty-free basis to BMJ Publishing Group Ltd ("BMJ") its licensees and where the relevant Journal is co-owned by BMJ to the co-owners of the Journal, to publish the Work in this journal and any other BMJ products and to exploit all rights, as set out in our [licence](#).

The Submitting Author accepts and understands that any supply made under these terms is made by BMJ to the Submitting Author unless you are acting as an employee on behalf of your employer or a postgraduate student of an affiliated institution which is paying any applicable article publishing charge ("APC") for Open Access articles. Where the Submitting Author wishes to make the Work available on an Open Access basis (and intends to pay the relevant APC), the terms of reuse of such Open Access shall be governed by a Creative Commons licence – details of these licences and which [Creative Commons](#) licence will apply to this Work are set out in our licence referred to above.

Other than as permitted in any relevant BMJ Author's Self Archiving Policies, I confirm this Work has not been accepted for publication elsewhere, is not being considered for publication elsewhere and does not duplicate material already published. I confirm all authors consent to publication of this Work and authorise the granting of this licence.



# Risk assessment of metabolic syndrome prevalence involving sedentary occupations and socioeconomic status

Ming-Shu Chen<sup>a</sup>, Chi-Hao Chiu<sup>b</sup>, and Shih-Hsin Chen<sup>\*c</sup>

<sup>a</sup>Department of Healthcare Administration, Asia Eastern University of Science and Technology, No.58, Sec. 2, Sichuan Rd., Pan-Chiao Dist., New Taipei City 22061, Taiwan (R.O.C.)

<sup>b</sup>Department of Medical Affairs, Far Eastern Memorial Hospital, No.21, Sec. 2, Nanya S. Rd., Banqiao Dist., New Taipei City 22061, Taiwan (R.O.C.)

<sup>c</sup>Department of Computer Science and Information, Tamkang University, No.151, Yingzhuang Rd., Tamsui Dist., New Taipei City 25137, Taiwan (R.O.C.)

## ABSTRACT

**Objectives:** To determine whether occupation type, distinguished by socioeconomic status (SES) and sedentary status, is associated with metabolic syndrome (MetS) risk.

**Methods:** We analyzed two data sets covering 73,506 individuals. MetS was identified according to the criteria of the modified Adult Treatment Panel III. Eight occupational categories were considered: professionals, technical workers, managers, salespeople, service staff, administrative staff, manual laborers, and taxi drivers; occupations were grouped into nonsedentary; sedentary, high-SES; and sedentary, non-high-SES occupations. A multiple logistic regression was used to determine significant risk factors for MetS in three age-stratified subgroups. R software for Windows (version 3.5.1) was used for all statistical analyses.

**Results:** MetS prevalence increased with age. Among participants aged  $\leq 40$  years, where MetS prevalence was low at 6.23%, having a nonsedentary occupation reduced the MetS risk (odds ratio [OR] = 0.88,  $p < 0.0295$ ). Among participants aged  $> 60$  years, having a sedentary, high-SES occupation significantly increased (OR = 1.39,  $p < 0.0247$ ) MetS risk.

**Conclusions:** The influence of occupation type on MetS risk differs among age groups. Nonsedentary occupations and sedentary, high-SES occupations decrease and increase MetS risk, respectively, among younger and older adults, respectively. Authorities should focus on individuals in sedentary, high-SES occupations.

**Keywords:** Sedentary occupation, Metabolic Syndrome, Risk assessment, Regression Model

### Strengths and limitations of this study

- We are the first to analyze the effects of a sedentary occupation and SES on metabolic syndrome.
- Two large data sets, covering 64,578 individuals, were employed.
- Occupations were segmented into the following categories: nonsedentary, sedentary and associated with high SES, and sedentary and not associated with high SES.
- A chi-square test was used for the categorical variables of age (in terms of three age groups) and type of occupation; a multiple logistic regression was used to determine significant factors for metabolic syndrome risk.
- The study's findings may not be applicable outside Taiwan.

## INTRODUCTION

Metabolic syndrome (MetS) is a public health concern in many countries, particularly those in the West. In the United States, 34% of the population has MetS, according to criteria formulated in the National Cholesterol Education Program Adult Treatment Panel (ATP) III; in particular, US adults older than 60 years of age are more prone to having MetS [1]. The

Corresponding author: shchen@mail.tku.edu.tw

health status of the Taiwanese population was estimated in 2002 using the data of 7566 participants in a nationwide cross-sectional population-based survey: the Taiwanese Survey on Prevalence of Hyperglycemia, Hyperlipidemia, and Hypertension. (TwSHHH). Hwang et al. [2] reported that the prevalence of MetS in women increases rapidly after menopause to a level higher than that in their male counterparts; they also noted MetS' high correlations with age and overweight and obesity. MetS is also a public health problem in other Asian countries, and studies on MetS have been conducted in Thailand [3], Malaysia [4], South Korea [5], and Japan [6] as well as Taiwan [2, 7, 8].

MetS is highly correlated with overweight and obesity [2, 9], and it comprises a constellation of interrelated metabolic disorders—including hypertension [10], type 2 diabetes mellitus (T2DM) [11, 12, 13], cardiovascular disease (CVD) [13, 14], and stroke [15]. In addition, having MetS increases the risk of having diabetes by five-fold [16]. Studies have overwhelmingly indicated that individuals with MetS or a sedentary occupation have an increased risk of T2DM and coronary heart disease and increased mortality due to CVD [11, 12, 13, 14, 17]. A study also reported that reduced muscular strength is associated with increased risk of CVD and CVD-related mortality [18].

The causes for MetS should thus be investigated. The risk factors for MetS include aging, a sedentary lifestyle, long working hours, physical inactivity, a Western diet, sleep duration greater than 7 hours [19], and high occupational stress [20]. Socioeconomic status (SES) and lifestyle are the possible risk factors for MetS [21, 22]. Among these factors, prolonged sitting is notable because it affects people of all ages and is becoming increasingly common because of the rapid automation of the workplace [23, 24]. Scholars have recently investigated the relationship of a sedentary occupation with MetS or CVD risk [9, 25, 26, 27, 28, 29, 30].

Bakrania et al. [26] demonstrated that sedentary behavior affects not only physical but also cognitive health. Leischik et al. [31] compared the health of 97 firefighters, 55 police officers, and 46 sedentary office workers in Germany, and they reported that having a sedentary occupation increased the likelihood of being obese and having MetS in their middle-aged sample. Another study on workers in a petroleum company reported that a sedentary lifestyle—specifically, being sedentary for 10 h/day with two-thirds of those 10 h spent sitting at work—was significantly associated with cardiometabolic risk factors [32]. An individual having a sedentary occupation is substantially more likely to be obese. Strauß et al. [9] reported that office workers had a significantly greater abdominal waist circumference (WC) than did firefighters and that

33% of sedentary German office workers had MetS. In a subsequent study, Strauß et al. [33] evaluated the 10-year cardiovascular risk of 46 office workers in Germany using the Framingham score and observed that office workers had a higher risk of CVD and MetS.

However, the association of MetS risk with not only occupation type but also SES must be determined [22, 32, 34, 35]. SES is a concept encompassing salary, social status, and education and can be indicated by an individual's occupation [36]. Al-Thani et al. [34] and Mehrdad et al. [22] reported that occupation type and seniority in a company, respectively, are not significantly associated with MetS risk. Therefore, this study conducted in Taiwan focused on the relationship of type of occupation with MetS prevalence as well as with the biochemical indexes of related chronic diseases. Specifically, this study focused on sedentary occupations and occupations associated with different SESs.

Finally, although numerous studies have analyzed several occupations or SESs in relation to MetS risk [22, 32, 34, 35], this study is the first to focus on occupations that are sedentary or associated with a high SES. Occupations were segmented into 1) nonsedentary, 2) sedentary and associated with high SES (sedentary, high-SES), and 3) sedentary and not associated with high SES (sedentary, non-high-SES) occupations. We hypothesized that sedentary, high-SES occupations differ from sedentary, non-high-SES occupations in the magnitude of their positive correlation with MetS prevalence and that both types of occupations are associated with increased MetS risk.

## METHODS

### Definition of a sedentary occupation and SES

According to the US Department of Labor's Dictionary of Occupational Titles, sedentary work is the occasional exertion of >10 lbs of force and/or a frequent exertion of a negligible amount of force. In this definition, "occasional" and "frequent" are defined as being present <1/3 and 1/3–2/3 of the time, respectively. Such force can be used to lift, carry, push, pull, or move objects—including the human body. Sedentary work involves sitting most of the time, but it may involve walking or standing for brief periods. Thus, a job was defined to be sedentary if walking and standing are required only occasionally, and all other sedentary criteria are met [37]. In this study, we selected taxi drivers, clerical jobs, and administrative jobs as representative of sedentary, non-high-SES occupations.

We focused on eight types of workers: professionals, tech-

<sup>1</sup><https://www.thehortongroup.com/resources/the-strength-test-levels>

1  
2  
3 nical workers, managers, salespeople, service staff, adminis-  
4 trativestaff, manuallaborers, andtaxidriver. Table 1 presents  
5 the occupations in the professional, technical, and managerial  
6 categories. Jans et al. [38] reported that occupations in the  
7 Netherlands differed with respect to the time a worker spends  
8 sitting. We put the occupation categories into three groups:  
9 general sedentary-related (Group-I), non-sedentary (Group-  
10 II), and sedentary-related and high-SES (Group-III), based on  
11 occupational environment and social-economic status (SES)  
12 of occupations. The arrangement of the eight works is illus-  
13 trated in Table 2.

### 14 15 16 17 **Definition of MetS**

18 MetS was defined in this study according to guidelines from  
19 the Health Promotion Administration of Taiwan's Ministry of  
20 Health and Welfare. MetS prevalence was evaluated using the  
21 definitions of the modified ATP III and the MetS criteria for  
22 Taiwanese people. Five major factors were used to determine  
23 whether a person had MetS: WC, high blood pressure, fast-  
24 ing blood sugar (BS), triglyceride (TG) level, and high-density  
25 lipoprotein cholesterol (HDL-C) level. High blood pressure  
26 was determined in terms of systolic blood pressure (SBP) and  
27 diastolic blood pressure (DBP). A Taiwanese person is defined  
28 as having MetS if they have three or more of the following five  
29 conditions in the ATP III: abdominal obesity, high TG, low  
30 HDL-C, hypertension, and hyperglycemia; Table 3 presents  
31 the criteria for defining MetS.

### 32 33 34 35 **Data resource and data collection**

36 We obtained two data sets from the New Taipei City Govern-  
37 ment Annual Taxi Health Examination Survey and from the  
38 MJ Health Check-Up–Based Population Database (MJPD).  
39 The data in the first data set covered the 2012–2016 period and  
40 were collected by Far Eastern Memorial Hospital (FEMH)<sup>2</sup>.  
41 this data set shall be termed “the FEMH data set” in the re-  
42 maining portion of the paper. The second MJPD data set was  
43 collected from four MJ clinics, which provide periodic health  
44 examinations to their members; this data set is accessible to  
45 any researcher upon request<sup>3</sup>.

46 The data sets were authorized for use in this study and pro-  
47 vided to us by the MJPD Health Research Foundation with  
48 FEMH Institutional Review Board (IRB) approval. The labo-  
49 ratory data of the two databases were obtained from the same  
50 biochemical examination apparatus (Hitachi-7600). The two

51 <sup>2</sup>FEMH is one of the only hospitals that mainly undertakes the annual health  
52 check-up of taxi drivers in New Taipei City, and it is also the hospital with  
53 the most significant number of services and the largest hospital in New Taipei  
54 City

55 <sup>3</sup><http://www.mjhrf.org/main/page/release1/en/release01>

data sets conform to the International Organization for Stan-  
dardization 15189 guidelines. This study's protocol was ap-  
proved by the Research Ethics Review Committee at FEMH  
(FEMH-IRB-107126-E) and the MJ Health Research Founda-  
tion.

### 56 57 58 59 **Data preprocessing**

The datasets were anonymized prior to any processing or anal-  
ysis. We enrolled 71,212 individuals (41,600 men and 29,612  
women) in the MJPD data set after those whose occupation  
did not fall under our three categories and those with miss-  
ing data were excluded. We also enrolled 2,294 taxi drivers  
(2,182 men and 112 women) from the FEMH database. Thus,  
the data of 73,506 individuals were subject to analysis.

Because age is a key factor influencing MetS risk, we strat-  
ified our sample into  $\leq 40$ , 40 to 60, and  $\geq 60$ -year-old sub-  
groups, which we refer to as the “younger,” “middle-aged,”  
and “older” subgroups, respectively. We focused on the effect  
on MetS risk from occupation—distinguished first by whether  
the field is sedentary or non-sedentary and second by the oc-  
cupation's association with SES.

### 60 61 62 63 **Statistical analysis**

Data analysis, including a multiple logistic regression with all  
variables, and data visualization were conducted in R (version  
3.5.1) software. A p-value of  $< 0.05$  indicated a statistically  
significant difference between two groups. In a univariate  
analysis, a two-sample independent *t* test was used to deter-  
mine the differences in the mean values of continuous vari-  
ables between participants with and without MetS. An exact  
chi-square test was used to determine the differences in cate-  
gorical variables between groups.

## 64 65 66 67 **PATIENT AND PUBLIC INVOLVEMENT**

This is second-hand de-identified data analysis, does not need  
patient and public direct involvement. This secondary data  
analysis was supported by the FEMH IRB and the MJ Health  
Research Foundation, the data is applied for and authorized to  
use (FEMHIRB-107126-E).

## 68 69 70 71 **RESULTS**

Gender, height, weight, WC, blood pressure, TG level, HDL-  
C, SBP, DBP, and fasting BS were used as covariates; Body  
Mess Index (BMI) was also computed from data on height  
and weight.

**Table 1** Occupations belonging to the professional, technical, and managerial categories

| Categories     | Occupations                                                                  |
|----------------|------------------------------------------------------------------------------|
| Professional-1 | Lawyers, teachers, accountants, and nurses                                   |
| Technical-2    | Engineers, architects, and programmers                                       |
| Managerial-3   | Senior executives of government departments or section chiefs of enterprises |

**Table 2** Sedentary versus nonsedentary and high-SES versus non-high-SES occupations

| Group number | Type                           | Categories                                                  |
|--------------|--------------------------------|-------------------------------------------------------------|
| Group-I      | General sedentary-related      | Service-5, Clerical and Administrative-6, and Taxi Driver-8 |
| Group-II     | Non sedentary-related          | Sales-4, and Manual Labor-7                                 |
| Group-III    | Sedentary-related and high-SES | Professional-1, Technical-2, and Managerial-3               |

**Table 3** MetS criteria

| No. | Factors                                      | Abnormal Condition                       |
|-----|----------------------------------------------|------------------------------------------|
| 1   | Fasting Plasma Glucose (FPG)                 | FPG $\geq$ 100mg/dL                      |
| 2   | High Density Lipoprotein Cholesterol (HDL-C) | Male $<$ 40mg/dL or Female $<$ 50mg/dL   |
| 3   | High Blood Pressure                          | SBP $\geq$ 130mmHg or DBP $\geq$ 85mmHg  |
| 4   | Triglyceride (TG)                            | TG $\geq$ 150mg/dL                       |
| 5   | Waist Circumference (WC)                     | Male $\geq$ 90 cm or Female $\geq$ 80 cm |

## Descriptive Statistics

Among the 73,506 participants, 57,932 did not have MetS, and 15,574 had MetS. The MetS prevalence in this study was thus 21.19%. Tables 4 and 5 present the descriptive statistics of physiological parameters, such as weight, SBP, and DBP, for the participants with different sex, respectively. Compared with participants with MetS, participants without MetS were healthier; their weight, SBP, WC, TG level, and BMI were lower, and their HDL-C level was higher. All physiological parameters were significantly related to MetS risk ( $p < 0.001$ ).

Tables 6 and 7 detail the age-stratified data of male and female participants, respectively. Among men, the MetS prevalence was 23.01%, 32.83%, and 35.92% in the younger, middle-aged, and older subgroups, respectively. Among women, the MetS prevalence was 6.23%, 15.68%, and 32.07% for the younger, middle-aged, and older subgroups, respectively. These findings are consistent with the finding that MetS prevalence increases with age [1, 15]. Furthermore, as noted in Table 6 and 7, most factors (such as weight, SBP, DBP, and WC) were significantly related ( $p < 0.001$ ) to MetS prevalence in all age-stratified subgroups, which was identical to the findings for the unstratified sample (Tables 4 and 5).

## Chi-square exact test and multiple logistic regression analysis

We used a chi-square test to analyze the relationships that categorical variables had with MetS risk; Tables 8 and 9 present the findings for the male and female participants, respectively (key findings are marked in bold). Age and occupation were significantly associated with MetS risk ( $p < 0.001$ ).

The eight occupational categories were significantly associated with MetS risk ( $p < 0.001$ ), among which taxi driving had the highest MetS prevalence rate (33.41% and 60.71% among men and women, respectively). As an aside, the female taxi drivers in our study were underrepresented in this occupation (at only 44 individuals) and had a much higher MetS prevalence than either the average woman or man (28.16% and 10.92%, respectively) in our overall sample. Furthermore, managers and salespeople had the second- and third-highest MetS prevalence at 32.52% and 29.53%, respectively. Among female participants, manual laborers and managers had the second and the third-highest MetS prevalence at 18.97% and 12.41%, respectively.

**Table 4** MetS characteristics of male participants

| Variables               | Total |       | Without<br>(n=31,454) |      | With<br>(n=12,328) |       | p-value |
|-------------------------|-------|-------|-----------------------|------|--------------------|-------|---------|
|                         | Mean  | SD    | Mean                  | SD   | Mean               | SD    |         |
| Weight(Kg)              | 72.8  | 11.3  | 69.7                  | 9.3  | 80.9               | 12.1  | <0.001  |
| SBP(mmHg)               | 120.6 | 15.0  | 116.8                 | 13.0 | 130.3              | 15.4  | <0.001  |
| DBP(mmHg)               | 77.4  | 10.5  | 74.8                  | 9.2  | 84.0               | 10.6  | <0.001  |
| WC(cm)                  | 84.1  | 8.7   | 81.2                  | 7.0  | 91.5               | (8.3) | <0.001  |
| Body Fat (%)            | 24.3  | 5.5   | 22.8                  | 4.8  | 28.0               | 5.3   | <0.001  |
| FPG(mg/dl)              | 103.2 | 18.7  | 99.5                  | 12.6 | 112.6              | 26.8  | <0.001  |
| TG(mg/dl)               | 136.8 | 103.5 | 113.6                 | 74.7 | 196.0              | 137.7 | <0.001  |
| CHOL                    | 197.5 | 34.2  | 195.4                 | 33.1 | 202.8              | 36.1  | <0.001  |
| HDL-C(mg/dl)            | 52.0  | 11.4  | 54.3                  | 11.3 | 46.0               | 9.3   | <0.001  |
| LDL-C(mg/dl)            | 124.8 | 32.1  | 122.9                 | 31.1 | 129.6              | 33.9  | <0.001  |
| BMI(Kg/m <sup>2</sup> ) | 24.8  | 3.4   | 23.7                  | 2.7  | 27.4               | 3.5   | <0.001  |

**Table 5** MetS characteristics of female participants

| Variables                            | Total  |       | Without<br>(n=26,478) |       | With<br>(n=3,246) |       | p-value |
|--------------------------------------|--------|-------|-----------------------|-------|-------------------|-------|---------|
|                                      | Mean   | SD    | Mean                  | SD    | Mean              | SD    |         |
| Weight(Kg)                           | 55.78  | 9.35  | 54.32                 | 7.76  | 67.70             | 12.28 | <0.001  |
| SBP(mmHg)                            | 107.49 | 14.89 | 105.48                | 13.15 | 123.88            | 17.81 | <0.001  |
| DBP(mmHg)                            | 68.44  | 10.06 | 67.32                 | 9.22  | 77.65             | 11.76 | <0.001  |
| WC(cm)                               | 71.08  | 7.91  | 69.71                 | 6.49  | 82.22             | 9.52  | <0.001  |
| Body Fat (%)                         | 29.03  | 6.75  | 27.97                 | 5.83  | 37.76             | 7.44  | <0.001  |
| FPG(mg/dl)                           | 97.02  | 14.39 | 95.04                 | 9.38  | 113.20            | 29.78 | <0.001  |
| TG(mg/dl)                            | 86.99  | 58.01 | 78.01                 | 43.40 | 160.16            | 97.19 | <0.001  |
| CHOL                                 | 190.61 | 32.57 | 189.36                | 31.96 | 200.81            | 35.56 | <0.001  |
| HDL-C(mg/dl)                         | 65.33  | 14.78 | 67.12                 | 14.21 | 50.80             | 10.78 | <0.001  |
| LDL-C(mg/dl) <sup>3</sup>            | 109.23 | 29.83 | 107.12                | 28.84 | 126.33            | 32.18 | <0.001  |
| BMI(Kg/m <sup>2</sup> ) <sup>4</sup> | 22.03  | 3.48  | 21.43                 | 2.83  | 26.93             | 4.31  | <0.001  |

**Table 6** MetS characteristics of male participants in age-stratified subgroups

| Variables               | Age≤40<br>(n=21,410) |              |         | 40<Age≤60<br>(n=20,565) |              |         | Age>60<br>(n=1,807) |              |         |
|-------------------------|----------------------|--------------|---------|-------------------------|--------------|---------|---------------------|--------------|---------|
|                         | Non Mets             | Mets         | p-value | Non MetS                | MetS         | p-value | Non MetS            | MetS         | p-value |
| Weight(Kg)              | 70.8(9.7)            | 85.1(12.5)   | <0.001  | 68.7(8.5)               | 78.6(11.0)   | <0.001  | 64.9(8.5)           | 73.5(9.6)    | <0.001  |
| SBP(mmHg)               | 115.9(11.7)          | 128.9(14.7)  | <0.001  | 117.1(13.7)             | 130.5(15.6)  | <0.001  | 125.8(17.2)         | 139.2(16.2)  | <0.001  |
| DBP(mmHg)               | 73.4(8.6)            | 82.4(10.6)   | <0.001  | 76.1(9.5)               | 85.0(10.5)   | <0.001  | 77.8(10.5)          | 85.0(10.0)   | <0.001  |
| WC(cm)                  | 80.8(7.2)            | 92.6(8.6)    | <0.001  | 81.6(6.7)               | 90.6(8.1)    | <0.001  | 83.0(7.4)           | 91.5(8.0)    | <0.001  |
| Body Fat (%)            | 23.3(5.0)            | 29.6(5.3)    | <0.001  | 22.3(4.5)               | 27.0(5.0)    | <0.001  | 21.3(4.8)           | 25.8(5.4)    | <0.001  |
| FPG(mg/dl)              | 97.8(9.3)            | 108.5(22.8)  | <0.001  | 101.2(14.7)             | 114.6(27.7)  | <0.001  | 103.3(21.0)         | 122.0(37.6)  | <0.001  |
| TG(mg/dl)               | 109.1(74.0)          | 198.9(148.4) | <0.001  | 120.1(77.0)             | 196.0(132.2) | <0.001  | 101.1(47.2)         | 173.7(103.5) | <0.001  |
| CHOL                    | 192.1(32.8)          | 203.5(36.2)  | <0.001  | 199.6(33.0)             | 203.1(36.0)  | <0.001  | 192.0(34.0)         | 194.6(35.3)  | <0.001  |
| HDL-C(mg/dl)            | 54.4(11.2)           | 45.4(8.9)    | <0.001  | 54.2(11.3)              | 46.3(9.5)    | <0.001  | 55.3(11.8)          | 46.3(10.5)   | <0.001  |
| LDL-C(mg/dl)            | 120.6(31.1)          | 131.9(33.9)  | <0.001  | 125.8(30.9)             | 128.7(34.0)  | <0.001  | 120.2(31.3)         | 122.0(32.0)  | <0.001  |
| BMI(Kg/m <sup>2</sup> ) | 23.7(2.9)            | 28.2(3.7)    | <0.001  | 23.7(2.5)               | 27.0(3.2)    | <0.001  | 23.8(2.8)           | 26.6(3.3)    | <0.001  |

We analyzed the associations between major factors of the three age groups in a multiple logistic regression model in Table 10 to Table 12. BMI (%), body weight (kg), body fat per-

centage (%) and total cholesterol (mg/dL) were revealed to be the important risk factors for MetS ( $p < 0.01$  or even  $p < 0.001$ ). There are significant differences in gender between

**Table 7** MetS characteristics of female participants in age-stratified subgroups

| Variables               | Age≤40<br>(n=15,972) |        |         | 40<Age≤60<br>(n=13,172) |        |         | Age>60<br>(n=580) |        |         |
|-------------------------|----------------------|--------|---------|-------------------------|--------|---------|-------------------|--------|---------|
|                         | Non Mets             | Mets   | p-value | Non MetS                | MetS   | p-value | Non MetS          | MetS   | p-value |
| Weight(Kg)              | 54.06                | 72.86  | <0.001  | 54.69                   | 65.80  | <0.001  | 63.56             | 64.47  | <0.001  |
| SBP(mmHg)               | 103.10               | 120.02 | <0.001  | 108.20                  | 125.09 | <0.001  | 53.50             | 61.22  | <0.001  |
| DBP(mmHg)               | 66.30                | 76.32  | <0.001  | 68.54                   | 78.43  | <0.001  | 118.69            | 131.14 | <0.001  |
| WC(cm)                  | 68.78                | 84.36  | <0.001  | 70.85                   | 81.28  | <0.001  | 71.42             | 76.18  | <0.001  |
| Body Fat (%)            | 27.51                | 40.42  | <0.001  | 28.54                   | 36.70  | <0.001  | 73.05             | 81.20  | <0.001  |
| FPG(mg/dl)              | 93.45                | 109.35 | <0.001  | 96.89                   | 114.45 | <0.001  | 29.12             | 35.18  | <0.001  |
| TG(mg/dl)               | 73.05                | 149.66 | <0.001  | 84.23                   | 165.27 | <0.001  | 91.55             | 159.60 | <0.001  |
| CHOL                    | 183.75               | 192.51 | <0.001  | 196.28                  | 203.75 | <0.001  | 207.74            | 212.53 | 0.1437  |
| HDL-C(mg/dl)            | 67.05                | 49.48  | <0.001  | 67.18                   | 51.13  | <0.001  | 67.84             | 54.21  | <0.001  |
| LDL-C(mg/dl)            | 102.60               | 123.23 | <0.001  | 112.66                  | 127.47 | <0.001  | 121.36            | 129.99 | 0.0047  |
| BMI(Kg/m <sup>2</sup> ) | 21.08                | 28.26  | <0.001  | 21.87                   | 26.39  | <0.001  | 22.49             | 25.71  | <0.001  |

**Table 8** Chi-square test results of differences in categorical variables between ages and between occupations among men

| Variables  | Item                          | Non-MetS |       | MetS  |       | p-value |
|------------|-------------------------------|----------|-------|-------|-------|---------|
|            |                               | n        | (%)   | n     | (%)   |         |
| Age        | Age≤40                        | 16,483   | 76.99 | 4,927 | 23.01 | <0.001  |
|            | 40<Age≤60                     | 13,813   | 67.17 | 6,752 | 32.83 |         |
|            | Age>60                        | 1,158    | 64.08 | 649   | 35.92 |         |
| Occupation | Professional-1                | 1,936    | 74.18 | 674   | 25.82 | <0.001  |
|            | Technical-2                   | 12,603   | 74.5  | 4,314 | 25.5  |         |
|            | Managerial-3                  | 5,704    | 67.48 | 2,749 | 32.52 |         |
|            | Sales-4                       | 4,516    | 70.47 | 1,892 | 29.53 |         |
|            | Service-5                     | 1,557    | 71.32 | 626   | 28.68 |         |
|            | Clerical and Administrative-6 | 1,558    | 73.94 | 549   | 26.06 |         |
|            | Manual Labor-7                | 2,127    | 72.79 | 795   | 27.21 |         |
|            | Taxi Driver-8                 | 1,453    | 66.59 | 729   | 33.41 |         |

**Table 9** Chi-square test results of differences in categorical variables between ages and between occupations among women

| Variables  | Item                          | Non-MetS |       | MetS  |       | p-value |
|------------|-------------------------------|----------|-------|-------|-------|---------|
|            |                               | n        | (%)   | n     | (%)   |         |
| Age        | Age≤40                        | 14,977   | 93.77 | 995   | 6.23  | <0.001  |
|            | 40<Age≤60                     | 11,107   | 84.32 | 2,065 | 15.68 |         |
|            | Age>60                        | 394      | 67.93 | 186   | 32.07 |         |
| Occupation | Professional-1                | 3,410    | 91.23 | 328   | 8.77  | <0.001  |
|            | Technical-2                   | 2,313    | 91.06 | 227   | 8.94  |         |
|            | Managerial-3                  | 2,809    | 87.59 | 398   | 12.41 |         |
|            | Sales-4                       | 4,738    | 89.87 | 534   | 10.13 |         |
|            | Service-5                     | 2,655    | 88.15 | 357   | 11.85 |         |
|            | Clerical and Administrative-6 | 9,334    | 89.81 | 1,059 | 10.19 |         |
|            | Manual Labor-7                | 1,175    | 81.03 | 275   | 18.97 |         |
|            | Taxi Driver-8                 | 44       | 39.29 | 68    | 60.71 |         |

the young and middle-aged groups. That is, male runs a higher risk to have MetS. However, there is no difference between the male and female when age > 60.

Tables 10-12 present the multiple logistic regression results for the three age-stratified subgroups, respectively. BMI (%), body weight (kg), body fat percentage (%), and total chole-

terol (mg/dL) were revealed to be the most significant risk factors for MetS ( $p < 0.01$  or  $p < 0.001$ ). Men were significantly more likely to have MetS than women in only the young and middle-aged subgroups.

With regard to the three occupational groups (Table 10), in the younger subgroup, individuals with a nonsedentary occupation were less likely to have MetS (odds ratio [OR] = 0.88, 95% confidence interval [CI]: 0.78–0.99,  $p = 0.0295$ ) than were those in other occupations. The three occupational groups did not differ with respect to MetS prevalence in the middle age group. In the older subgroup, MetS prevalence was higher among individuals in sedentary, high-SES occupations (OR = 1.39, CI: 1.04–1.85,  $p = 0.0247$ ) than among individuals in other occupations and higher among men than women. Men and women did not significantly differ with respect to MetS prevalence.

## DISCUSSION

Owen et al. [24] reported that the average person spends 1) 71% of their daily waking hours in an inactive state and 2) only 30 min daily on moderate-intensity physical activity on most days of a week. As noted in the literature review in the Introduction section, leading a sedentary lifestyle significantly increases the risk of MetS [24, 39, 40]. A sedentary lifestyle also increases the risk of obesity [9], poor cardiometabolic health [17, 32], and poor cognitive health [26]. An increasing number of researchers have begun to investigate the correlation of a sedentary occupation with MetS or CVD risk [9, 25, 26, 27, 29, 30].

However, most MetS risk factors have centered on a lack of physical activity rather than on a sedentary occupation [41, 42]. Studies have also demonstrated that lifestyle and SES are significant risk factors for MetS [21, 22] and CVD [21, 43, 44]. However, Kim et al. [45] argued that a causal relationship of SES with MetS and CVD risk, as indicated by the Framingham risk score, cannot be inferred from the current body of cross-sectional evidence. Furthermore, scholars have yet to investigate the role of occupation in MetS risk, let alone in a fine-grained manner with occupation further distinguished by level of physical activity and association with SES. In particular, MetS risk is likely to differ between those working in typically sedentary, white-collar occupations (such as doctors, professors, managers, and engineers) and those working in sedentary blue-collar occupations (such as administrative staff, service staff, and taxi drivers).

Our findings indicate that age and occupation are significant MetS risk factors among men and women (Table 8 and 9, respectively). Managers and taxi drivers, regardless of gender, were more likely to have MetS than were those in other occu-

pations. Notably, salesmen, despite having a relatively physically active job, had the third-highest (and still high) MetS prevalence rate. The reasons for this finding should be investigated in future research. Furthermore, MetS prevalence was low among women younger than 60 years old (Tables 8 and 9) but high (at 32.07%, similar to that of their male counterparts) among women older than 60 years old. This is attributable to a decrease in estrogen levels after menopause [46].

Due to the age group influencing the highest prevalence of MetS, this study compared the three occupation categories under different age groups. In Table 10, we found the nonsedentary occupation group has less chance to have MetS. In Table 11, there is no difference among the three occupational groups which implies occupational effects might not be the key factor for MetS. However, high-SES-associated occupations of the older age group are at a higher risk of MetS than general sedentary and non-sedentary occupations shown in Table 12. Hence, the people who are belonged this sedentary and high-SES occupations should avoid prolonged sitting all day long. In addition, there is no difference between the male and female due to MetS was more prevalent among postmenopausal female [46].

Individuals in a nonsedentary occupation were less likely to have MetS (Table 10). The three occupational groups did not differ with respect to MetS prevalence (Table 11), which implies that occupation is not a key factor for MetS. However, among participants in the older subgroup, having a sedentary, high-SES occupations was associated with a higher risk of MetS (Table 12). Thus, individuals in sedentary, high-SES occupations should avoid prolonged sitting [46].

## CONCLUSIONS

Although prolonged sitting is a seemingly novel risk factor for health outcomes across all ages, its association must be determined under occupational conditions [32]. Our findings indicate that age and occupation type are risk factors for MetS. We found that lawyers, teachers, accountants, doctors, nurses, engineers, managers, and taxi drivers constitute high-risk groups for MetS. For individuals 40 years old, having a nonsedentary occupation lowers the risk of MetS. For individuals >60 years old, having a sedentary, high-SES occupation significantly increases the risk of MetS. Government authorities should focus on sedentary, high-SES workers by tailoring health promotion programs—involving, for example, aerobic exercise [47] or physical activity [28, 48]—to this group of workers.

**Table 10** Multiple logistic regression results for factors associated with MetS risk among participants aged ≤ 40 years

| Variables                | Condition   | OR   | 95%CI |      | p-value |
|--------------------------|-------------|------|-------|------|---------|
| Occupation               | Group-I*    | 1.00 |       |      |         |
|                          | Group-II †  | 0.88 | 0.78  | 0.99 | 0.0295  |
|                          | Group-III ‡ | 1.03 | 0.95  | 1.12 | 0.4825  |
| Gender                   | Male        | 1.00 |       |      |         |
|                          | Female      | 0.43 | 0.37  | 0.51 | <0.001  |
| Weight(Kg)               |             | 1.04 | 1.03  | 1.05 | <0.001  |
| BMI                      |             | 1.26 | 1.22  | 1.29 | <0.001  |
| Body Fat Percentage(%)   |             | 1.07 | 1.06  | 1.08 | <0.001  |
| LDL-C(mg/dl)             |             | 1.00 | 1.00  | 1.01 | 0.0012  |
| Total Cholesterol(mg/dl) |             | 1.00 | 1.00  | 1.00 | 0.0406  |

\*Group-I: General sedentary-related occupations

†Group-II: non sedentary-related occupations ‡Group-

III: sedentary-related occupations with high-SES

**Table 11** Multiple logistic regression results for factors associated with MetS risk among participants aged 40–60 years

| Variables                | Condition | OR   | 95%CI |      | p-value |
|--------------------------|-----------|------|-------|------|---------|
| Occupation               | Group-I   | 1.00 |       |      |         |
|                          | Group-II  | 1.01 | 0.93  | 1.10 | 0.8170  |
|                          | Group-III | 0.98 | 0.91  | 1.05 | 0.5618  |
| Gender                   | Male      | 1.00 |       |      |         |
|                          | Female    | 0.46 | 0.40  | 0.52 | <0.001  |
| Weight(Kg)               |           | 1.03 | 1.02  | 1.03 | <0.001  |
| BMI                      |           | 1.30 | 1.27  | 1.33 | <0.001  |
| Body Fat Percentage(%)   |           | 1.07 | 1.06  | 1.08 | <0.001  |
| LDL-C(mg/dl)             |           | 1.00 | 1.00  | 1.00 | 0.2922  |
| Total Cholesterol(mg/dl) |           | 1.00 | 1.00  | 1.00 | <0.001  |

**Table 12** Multiple logistic regression results for factors associated with MetS risk among participants aged > 60 years

| Variables                | Condition | OR   | 95%CI |      | p-value |
|--------------------------|-----------|------|-------|------|---------|
| Occupation               | Group-I   | 1.00 |       |      |         |
|                          | Group-II  | 1.16 | 0.89  | 1.53 | 0.2708  |
|                          | Group-III | 1.39 | 1.04  | 1.85 | 0.0247  |
| Gender                   | Male      | 1.00 |       |      |         |
|                          | Female    | 0.99 | 0.65  | 1.50 | 0.9657  |
| Weight(Kg)               |           | 1.06 | 1.04  | 1.08 | <0.001  |
| BMI                      |           | 1.10 | 1.03  | 1.18 | 0.0059  |
| Body Fat Percentage(%)   |           | 1.08 | 1.05  | 1.11 | <0.001  |
| LDL-C(mg/dl)             |           | 1.00 | 0.99  | 1.00 | 0.1646  |
| Total Cholesterol(mg/dl) |           | 1.00 | 1.00  | 1.01 | 0.1900  |

## ACKNOWLEDGEMENTS

We thank the Ministry of Science and Technology for supporting this research (grant numbers: MOST-107-2221-E-161-002 and MOST-108-2221-E-161-003-MY2). We also thank

the FEMH for their support (grant number: NSC-RD-106-1-12-504). The authors would like to thank Dr. Yen-Ling Chiu (Nephrologist) and Dr. Yen-Wen Wu (Cardiologist) from FEMH.



## FOOTNOTES

### Contributors

M.-S.C. (Ming-Shu Chen) conceived and designed the experiments; M.-S.C. and C.-H.C. (Chi-Hao Chiu) performed the experiments; C.-H.C., and S.-H.C. (Shih-Hsin Chen) analyzed the data; M.-S.C. supervised the study; M.-S.C. contributed material for investigation; M.-S.C., C.-H.C., and S.-H.C. wrote this paper together. S.-H.C. submitted this paper.

### Funding

This research was funded by grants from the Ministry of Science and Technology in Taiwan (grant numbers: MOST-107-2221-E-161-002 MOST-108-2221-E-161-003-MY2) and from FEMH (ID: NSC-RD-106-1-12-504). The authors declare no conflict of interest. The funding bodies had no role in the design of the study; in the collection, analyses, or interpretation of data; in the writing of the manuscript; or in the decision to publish the results.

## COMPETING INTERESTS

The authors declare no conflicts of interest concerning this study.

### Ethics approval

Ethical approval was obtained from the Research Ethics Review Committee at FEMH in New Taipei City, Taiwan (IRB approval number: FEMH-IRB-107126-E, v.02; board meeting and approval date: September 10, 2018). The MJ Health Research Foundation also approved this study. This study also has a PPS receipt (ClinicalTrials.gov ID: NCT04142593, Date: October 25, 2019).

### Data sharing statement

We aggregated two databases from the New Taipei City Government Annual Taxi Health Examination Survey by FEMH and from the MJPD (for 2012–2016). Access to the first data set by the wider scholarly community is restricted by the Research Ethics Review Committee of FEMH (FEMH-IRB-107126-E, v.02) out of concern for participant privacy. The second data set is accessible to any researcher upon request. Please contact Dr. Ming-Shu Chen (email: tree1013@gmail.com) to obtain further information.

### Consent to patient and public involvement statement

No patients were involved.

## REFERENCES

- 1 R Bethene Ervin. Prevalence of metabolic syndrome among adults 20 years of age and over, by sex, age, race and ethnicity, and body mass index: United states. *National health statistics reports*, 13:1–8, 2009.
- 2 Lee-Ching Hwang, Chyi-Huey Bai, and Chien-Jen Chen. Prevalence of obesity and metabolic syndrome in taiwan. *Journal of the Formosan Medical Association*, 105(8):626–635, 2006.
- 3 Apilak Worachartcheewan, Chanin Nantasenamat, Chartchalerm Isarankura-Na-Ayudhya, Phannee Pidetcha, and Virapong Prachayasittikul. Identification of metabolic syndrome using decision tree analysis. *Diabetes Research and Clinical Practice*, 90(1):e15–e18, 2010.
- 4 Yuan Ching, Yit Chin, Mahenderan Appukutty, Wan Gan, Vasudevan Ramachandran, and Yoke Chan. Prevalence of metabolic syndrome and its associated factors among vegetarians in malaysia. *International journal of environmental research and public health*, 15(9):2031, 2018.
- 5 SuJin Song, Hee Young Paik, Won O Song, and YoonJu Song. Metabolic syndrome risk factors are associated with white rice intake in korean adolescent girls and boys. *British Journal of Nutrition*, 113(3):479–487, 2015.
- 6 Hideo Matsuura, Kanae Mure, Nobuhiro Nishio, Naomi Kitano, Naoko Nagai, and Tatsuya Takeshita. Relationship between coffee consumption and prevalence of metabolic syndrome among japanese civil servants. *Journal of epidemiology*, 22(2):160–166, 2012.
- 7 Ming-Shu Chen and Shih-Hsin Chen. A data-driven assessment of the metabolic syndrome criteria for adult health management in taiwan. *International journal of environmental research and public health*, 16(1):92, 2019.
- 8 Xinghua Yang, Qiushan Tao, Feng Sun, and Siyan Zhan. The impact of socioeconomic status on the incidence of metabolic syndrome in a taiwanese health screening population. *International Journal of Public Health*, 57(3):551–559, 2012.
- 9 Markus Strauß, Peter Foshag, Bianca Przybyłek, Marc Horlitz, Alejandro Lucia, Fabian Sanchis-Gomar, and Roman Leischik. Occupation and metabolic syndrome: is

- there correlation? a cross sectional study in different work activity occupations of german firefighters and office workers. *Diabetology & metabolic syndrome*, 8(1):57, 2016.
- 10 Enzo Bonora, Stefan Kiechl, Johann Willeit, Friedrich Oberhollenzer, Georg Egger, Riccardo C Bonadonna, and Michele Muggeo. Carotid atherosclerosis and coronary heart disease in the metabolic syndrome: prospective data from the bruneck study. *Diabetes care*, 26(4):1251–1257, 2003.
- 11 Joseph Henson, David W Dunstan, Melanie J Davies, and Thomas Yates. Sedentary behaviour as a new behavioural target in the prevention and treatment of type 2 diabetes. *Diabetes/metabolism research and reviews*, 32(S1):213–220, 2016.
- 12 Robert L Hanson, Giuseppina Imperatore, Peter H Bennett, and William C Knowler. Components of the “metabolic syndrome” and incidence of type 2 diabetes. *Diabetes*, 51(10):3120–3127, 2002.
- 13 Peter WF Wilson, Ralph B D’Agostino, Helen Parise, Lisa Sullivan, and James B Meigs. Metabolic syndrome as a precursor of cardiovascular disease and type 2 diabetes mellitus. *Circulation*, 112(20):3066–3072, 2005.
- 14 BO Isomaa, Peter Almgren, Tiinamaija Tuomi, Björn Forsén, Kaj Lahti, Michael Nissén, Marja-Riitta Taskinen, and Leif Groop. Cardiovascular morbidity and mortality associated with the metabolic syndrome. *Diabetes care*, 24(4):683–689, 2001.
- 15 Ann Marie McNeill, Ronit Katz, Cynthia J Girman, Wayne D Rosamond, Lynne E Wagenknecht, Joshua I Barzilay, Russell P Tracy, Peter J Savage, and Sharon A Jackson. Metabolic syndrome and cardiovascular disease in older people: the cardiovascular health study. *Journal of the American Geriatrics Society*, 54(9):1317–1324, 2006.
- 16 MusaSaulawaIbrahim, DongPang, GurchRandhawa, and Yannis Pappas. Risk models and scores for metabolic syndrome: systematic review protocol. *BMJ open*, 9(9):e027326, 2019.
- 17 Kishan Bakrania, Charlotte L Edwardson, Danielle H Bodicoat, Dale W Esliger, Jason MR Gill, Aadil Kazi, Latha Velayudhan, Alan J Sinclair, Naveed Sattar, Stuart JH Biddle, et al. Associations of mutually exclusive categories of physical activity and sedentary time with markers of cardiometabolic health in english adults: a cross-sectional analysis of the health survey for england. *BMC public health*, 16(1):25, 2016.
- 18 Salvatore Carbone, Danielle L Kirkman, Ryan S Garten, Paula Rodriguez-Miguelez, Enrique G Artero, Duck-chul Lee, and Carl J Lavie. Muscular strength and cardiovascular disease: an updated state-of-the-art narrative review. *Journal of Cardiopulmonary Rehabilitation and Prevention*, 40(5):302–309, 2020.
- 19 Jason Brocato, Fen Wu, Yu Chen, Magdy Shamy, Mansour A Alghamdi, Mamdouh I Khoder, Alser A Alkhatim, Mamdouh H Abdou, and Max Costa. Association between sleeping hours and cardiometabolic risk factors for metabolic syndrome in a saudi arabian population. *BMJ open*, 5(11), 2015.
- 20 Jui Hua Huang, Ren Hau Li, Shu Ling Huang, Hon Ke Sia, Yu Ling Chen, and Feng Cheng Tang. Lifestyle factors and metabolic syndrome among workers: The role of interactions between smoking and alcohol to nutrition and exercise. *International Journal of Environmental Research Public Health*, 12(12):15967–15978, 2015.
- 21 Chen-Mao Liao and Chih-Ming Lin. Life course effects of socioeconomic and lifestyle factors on metabolic syndrome and 10-year risk of cardiovascular disease: A longitudinal study in taiwan adults. *International Journal of Environmental Research and Public Health*, 15(10):2178, 2018.
- 22 R Mehrdad, G Pouryaghoub, and M Moradi. Association between metabolic syndrome and job rank. *Int J Occup Environ Med*, 9(1):45–51, 2018.
- 23 Andrea Bankoski, Tamara B Harris, James J McClain, Robert J Brychta, Paolo Caserotti, Kong Y Chen, David Berrigan, Richard P Troiano, and Annemarie Koster. Sedentary activity associated with metabolic syndrome independent of physical activity. *Diabetes care*, 34(2):497–503, 2011.
- 24 Neville Owen, Geneviève N Healy, Charles E Matthews, and David W Dunstan. Too much sitting: the population-health science of sedentary behavior. *Exercise and sport sciences reviews*, 38(3):105, 2010.
- 25 Maria Aguilar, Taft Bhuket, Sharon Torres, Benny Liu, and Robert J Wong. Prevalence of the metabolic syndrome in the united states, 2003-2012. *Jama*, 313(19):1973–1974, 2015.
- 26 Kishan Bakrania, Charlotte L Edwardson, Kamlesh Khunti, StephanBandelow, MelanieJDavies, andThomas Yates. Associations between sedentary behaviours and

- cognitive function: cross-sectional and prospective findings from the uk biobank. *American Journal of Epidemiology*, 2017.
- 27 Duk Cho and Jung-Wan Koo. Differences in metabolic syndrome prevalence by employment type and sex. *International journal of environmental research and public health*, 15(9):1798, 2018.
- 28 Carl J Lavie, Cemal Ozemek, Salvatore Carbone, Peter T Katzmarzyk, and Steven N Blair. Sedentary behavior, exercise, and cardiovascular health. *Circulation research*, 124(5):799–815, 2019.
- 29 Asuka Sakuraya, Kazuhiro Watanabe, Norito Kawakami, Kotaro Imamura, Emiko Ando, Yumi Asai, Hisashi Eguchi, Yuka Kobayashi, Norimitsu Nishida, Hideaki Arima, et al. Work-related psychosocial factors and onset of metabolic syndrome among workers: a systematic review and meta-analysis protocol. *BMJ open*, 7(6):e016716, 2017.
- 30 Seung Yong Shin, Chul Gab Lee, Han Soo Song, Sul Ha Kim, Hyun Seung Lee, Min Soo Jung, and Sang Kon Yoo. Cardiovascular disease risk of bus drivers in a city of korea. *Annals of occupational and environmental medicine*, 25(1):34, 2013.
- 31 Roman Leischik, Peter Foshag, Markus Strauß, Henning Littwitz, Pankaj Garg, Birgit Dworrak, and Marc Horlitz. Aerobic capacity, physical activity and metabolic risk factors in firefighters compared with police officers and sedentary clerks. *PloS one*, 10(7):e0133113, 2015.
- 32 Chutima Jalayondeja, Wattana Jalayondeja, Keerin Mekhora, Petcharatana Bhuanantanondh, Asadang Dusadi-Isariyavong, and Rujiret Upiriyasakul. Break in sedentary behavior reduces the risk of noncommunicable diseases and cardiometabolic risk factors among workers in a petroleum company. *International journal of environmental research and public health*, 14(5):501, 2017.
- 33 Markus Strauss, Peter Foshag, and Roman Leischik. Prospective evaluation of cardiovascular, cardiorespiratory, and metabolic risk of german office workers in comparison to international data. *International journal of environmental research and public health*, 17(5):1590, 2020.
- 34 Mohamed Hamad Al-Thani, Sohaila Cheema, Javaid Sheikh, Ravinder Mamtani, Albert B Lowenfels, Walaa Fattah Al-Chetachi, Badria Ali Almalki, Shamseldin Ali Hassan Khalifa, Ahmad Omar Haj Bakri, Patrick Maisonneuve, et al. Prevalence and determinants of metabolic syndrome in qatar: results from a national health survey. *BMJ open*, 6(9), 2016.
- 35 Anne Kouvonen, Mika Kivimäki, Marko Elovainio, Jaana Pentti, Anne Linna, Marianna Virtanen, and Jussi Vahtera. Effort/reward imbalance and sedentary lifestyle: an observational study in a large occupational cohort. *Occupational and environmental medicine*, 63(6):422–427, 2006.
- 36 R Leischik, B Dworrak, M Strauss, B Przybyłek, D Schöne, M Horlitz, A Mügge, and T Dworrak. Plasticity of health. *German Journal of Medicine*, 1:1–17, 2016.
- 37 Pamela S Cain and Donald J Treiman. The dictionary of occupational titles as a source of occupational data. *American Sociological Review*, pages 253–278, 1981.
- 38 Proper K. I. Hildebrandt V. H. Jans, M. P. Sedentary behavior in dutch workers: differences between occupations and business sectors. *American journal of preventive medicine*, 33(6):450–454, 2007.
- 39 Earl S Ford, Harold W Kohl, Ali H Mokdad, and Umed A Ajani. Sedentary behavior, physical activity, and the metabolic syndrome among us adults. *Obesity*, 13(3):608–614, 2005.
- 40 Katrien Wijndaele, N Duvigneaud, Lynn Matton, William Duquet, Christophe Delecluse, Martine Thomis, Gaston Beunen, Johan Lefevre, and RM Philippaerts. Sedentary behaviour, physical activity and a continuous metabolic syndromeriskscoreinadults. *Europeanjournalofclinical nutrition*, 63(3):421, 2009.
- 41 Genevieve N Healy, Katrien Wijndaele, David W Dunstan, Jonathan E Shaw, Jo Salmon, Paul Z Zimmet, and Neville Owen. Objectively measured sedentary time, physical activity, and metabolic risk. *Diabetes care*, 31(2):369–371, 2008.
- 42 RJ Shephard. Breaks in sedentary time: Beneficial associations with metabolic risk healy gn, dunstan dw, salmon j, et al (the univ of queensland, brisbane, australia; the international diabetes inst, melbourne, australia; deakin univ, melbourne, australia; et al) diabetes care 31: 661-666, 2008. *Year Book of Sports Medicine*, 2010:183–185, 2010.
- 43 Eric B Loucks, David H Rehkopf, Rebecca C Thurston, and Ichiro Kawachi. Socioeconomic disparities in metabolic syndrome differ by gender: evidence from nhanes iii. *Annals of epidemiology*, 17(1):19–26, 2007.

- 1  
2  
3 44 Sunmi Yoo, Hong-Jun Cho, and Young-Ho Khang.  
4 General and abdominal obesity in south korea, 1998–  
5 2007: gender and socioeconomic differences. *Preventive*  
6 *medicine*, 51(6):460–465, 2010.  
7  
8 45 Ji Young Kim, Sung Hi Kim, and Yoon Jeong Cho. So-  
9 cioeconomic status in association with metabolic syn-  
10 drome and coronary heart disease risk. *Korean journal*  
11 *of family medicine*, 34(2):131, 2013.  
12  
13 46 Ricardo de Marchi, Cátia Millene Dell’Agnolo, Tiara  
14 Cristina Romeiro Lopes, Angela Andréia França Gravena,  
15 Marcela de Oliveira Demitto, Sheila Cristina Rocha  
16 Brischiliari, Deise Helena Pelloso Borghesan, Maria  
17 Dalva de Barros Carvalho, and Sandra Marisa Pel-  
18 loso. Prevalence of metabolic syndrome in pre-and post-  
19 menopausal women. *Archives of Endocrinology and*  
20 *Metabolism*, 61(2):160–166, 2017.  
21  
22 47 Esmée A Bakker, Duck-chul Lee, Xuemei Sui, Enrique G  
23 Artero, JonatanRRuiz, ThijsMHEijsvogels, CarlJLlavie,  
24 and Steven N Blair. Association of resistance exercise,  
25 independent of and combined with aerobic exercise, with  
26 the incidence of metabolic syndrome. In *Mayo Clinic Pro-*  
27 *ceedings*, volume 92, pages 1214–1222. Elsevier, 2017.  
28  
29 48 Gerald F Fletcher, Carolyn Landolfo, Josef Niebauer, Ce-  
30 mal Ozemek, Ross Arena, and Carl J Lavie. Promot-  
31 ing physical activity and exercise: Jacc health promotion  
32 series. *Journal of the American College of Cardiology*,  
33 72(14):1622–1639, 2018.  
34  
35  
36  
37  
38  
39  
40  
41  
42  
43  
44  
45  
46  
47  
48  
49  
50  
51  
52  
53  
54  
55  
56  
57  
58  
59  
60

STROBE Statement—Checklist of items that should be included in reports of *case-control studies*

| Item                         | No  | Recommendation                                                                                                                                                                                    | Page No      |
|------------------------------|-----|---------------------------------------------------------------------------------------------------------------------------------------------------------------------------------------------------|--------------|
| <b>Title and abstract</b>    | 1   | (a) Indicate the study's design with a commonly used term in the title or the abstract                                                                                                            | Page 1       |
|                              |     | (b) Provide in the abstract an informative and balanced summary of what was done and what was found                                                                                               | Page 1       |
| <b>Introduction</b>          |     |                                                                                                                                                                                                   |              |
| Background/rationale         | 2   | Explain the scientific background and rationale for the investigation being reported                                                                                                              | Page 1-2     |
| Objectives                   | 3   | State specific objectives, including any prespecified hypotheses                                                                                                                                  | Page 1-2     |
| <b>Methods</b>               |     |                                                                                                                                                                                                   |              |
| Study design                 | 4   | Present key elements of study design early in the paper                                                                                                                                           | Page 2-3     |
| Setting                      | 5   | Describe the setting, locations, and relevant dates, including periods of recruitment, exposure, follow-up, and data collection                                                                   | Page 2-3     |
| Participants                 | 6   | (a) Give the eligibility criteria, and the sources and methods of case ascertainment and control selection. Give the rationale for the choice of cases and controls                               | Page 3       |
|                              |     | (b) For matched studies, give matching criteria and the number of controls per case                                                                                                               | Page 2-3     |
| Variables                    | 7   | Clearly define all outcomes, exposures, predictors, potential confounders, and effect modifiers. Give diagnostic criteria, if applicable                                                          | NA           |
| Data sources/<br>measurement | 8*  | For each variable of interest, give sources of data and details of methods of assessment (measurement). Describe comparability of assessment methods if there is more than one group              | Page 2-3     |
| Bias                         | 9   | Describe any efforts to address potential sources of bias                                                                                                                                         | Page 1 and 7 |
| Study size                   | 10  | Explain how the study size was arrived at                                                                                                                                                         | NA           |
| Quantitative variables       | 11  | Explain how quantitative variables were handled in the analyses. If applicable, describe which groupings were chosen and why                                                                      | Page 3       |
| Statistical methods          | 12  | (a) Describe all statistical methods, including those used to control for confounding                                                                                                             | Page 2-3     |
|                              |     | (b) Describe any methods used to examine subgroups and interactions                                                                                                                               | Page 2-3     |
|                              |     | (c) Explain how missing data were addressed                                                                                                                                                       | Page 2-3     |
|                              |     | (d) If applicable, explain how matching of cases and controls was addressed                                                                                                                       | Page 2-3     |
|                              |     | (e) Describe any sensitivity analyses                                                                                                                                                             | Page 2-3     |
| <b>Results</b>               |     |                                                                                                                                                                                                   |              |
| Participants                 | 13* | (a) Report numbers of individuals at each stage of study—eg numbers potentially eligible, examined for eligibility, confirmed eligible, included in the study, completing follow-up, and analysed | Page 4-7     |
|                              |     | (b) Give reasons for non-participation at each stage                                                                                                                                              | Page 4-7     |
|                              |     | (c) Consider use of a flow diagram                                                                                                                                                                | Page 4-7     |
| Descriptive data             | 14* | (a) Give characteristics of study participants (eg demographic, clinical, social) and information on exposures and potential confounders                                                          | Page 4-7     |

|                          |     |                                                                                                                                                                                                              |                     |
|--------------------------|-----|--------------------------------------------------------------------------------------------------------------------------------------------------------------------------------------------------------------|---------------------|
|                          |     | (b) Indicate number of participants with missing data for each variable of interest                                                                                                                          | Page 4-7            |
| Outcome data             | 15* | Report numbers in each exposure category, or summary measures of exposure                                                                                                                                    | Page 4-7            |
| Main results             | 16  | (a) Give unadjusted estimates and, if applicable, confounder-adjusted estimates and their precision (eg, 95% confidence interval). Make clear which confounders were adjusted for and why they were included | Table 4-9           |
|                          |     | (b) Report category boundaries when continuous variables were categorized                                                                                                                                    | Table 4-9           |
|                          |     | (c) If relevant, consider translating estimates of relative risk into absolute risk for a meaningful time period                                                                                             | Table 4-9           |
| Other analyses           | 17  | Report other analyses done—eg analyses of subgroups and interactions, and sensitivity analyses                                                                                                               | Page 4-7            |
| <b>Discussion</b>        |     |                                                                                                                                                                                                              |                     |
| Key results              | 18  | Summarise key results with reference to study objectives                                                                                                                                                     | Page 1 and Page 7-8 |
| Limitations              | 19  | Discuss limitations of the study, taking into account sources of potential bias or imprecision. Discuss both direction and magnitude of any potential bias                                                   | Page 1 and 7        |
| Interpretation           | 20  | Give a cautious overall interpretation of results considering objectives, limitations, multiplicity of analyses, results from similar studies, and other relevant evidence                                   | Page 1 and 7        |
| Generalisability         | 21  | Discuss the generalisability (external validity) of the study results                                                                                                                                        | Page 7-8            |
| <b>Other information</b> |     |                                                                                                                                                                                                              |                     |
| Funding                  | 22  | Give the source of funding and the role of the funders for the present study and, if applicable, for the original study on which the present article is based                                                | Page 8              |

\*Give information separately for cases and controls.

**Responding: This study is not a typical “case-control studies” and research design, we only on the major study subjects to select the appropriate study objects to compare in this study.**

**Note:** An Explanation and Elaboration article discusses each checklist item and gives methodological background and published examples of transparent reporting. The STROBE checklist is best used in conjunction with this article (freely available on the Web sites of PLoS Medicine at <http://www.plosmedicine.org/>, Annals of Internal Medicine at <http://www.annals.org/>, and Epidemiology at <http://www.epidem.com/>). Information on the STROBE Initiative is available at <http://www.strobe-statement.org>.
